# Supplementary material for: Expression of miR-652-3p and Effect on Apoptosis and Drug Sensitivity in Pediatric Acute Lymphoblastic Leukemia
Source: Biomed Res Int. 2018 Jun 5;2018:5724686. doi: 10.1155/2018/5724686 (PMC6008837; doi:10.1155/2018/5724686)
Supplement: Supplementary Materials — Supplementary Table 1: the expression profiles of circulating miRNAs were analyzed and compared among healthy controls and pediatric patients with ALL at new diagnosis (ND), complete remission (CR), and relapse (RE), using the qRT-PCR-based TaqMan low-density miRNA arrays. Supplementary Table 2: summary of the target prediction for miR-652-3p. Supplementary Table 3: the possible biological targets of miR-652-3p predicted by Target Scan software. Supplementary Table 4: the possible biological targets of miR-652-3p predicted by microRNA.org database. Supplementary Table 5: the possible biological targets of miR-652-3p predicted by miRDB database. [file 5724686.f1.zip › Supplementary Table 1.xlsx]

## Sheet: ND vs. healthy
microRNA	Fold change	P value
hsa-miR-22	-3661.66	1.52211e-05
hsa-miR-624	-27.0598	3.09676e-05
hsa-miR-29a#	-8.27797	3.46846e-05
hsa-miR-183	-39.5102	0.000830159
hsa-miR-190b	-10.8827	0.00139874
hsa-miR-339-5p	-27.6995	0.00195991
hsa-miR-501-3p	-20.2424	0.00196406
hsa-miR-200b	-17.9117	0.00256069
hsa-miR-195	-7.00902	0.00367287
mmu-miR-140	-22.3009	0.00372108
hsa-miR-487b	-5.52375	0.0062764
hsa-miR-301	-8.84726	0.00776624
hsa-miR-200c	-35.1577	0.0130276
hsa-miR-106b	-13.933	0.0130308
hsa-miR-502-3p	-8.93499	0.0138157
hsa-miR-18a	-13.8858	0.0138199
hsa-miR-27a	-8.82858	0.0143696
RNU48	-21.1637	0.0176697
hsa-miR-142-5p	-11.2025	0.0188259
hsa-miR-142-3p	-5.3198	0.0191957
hsa-miR-15a#	-21.2185	0.0194419
hsa-miR-196b	-5.86639	0.0197581
hsa-miR-340#	-13.2937	0.0204515
hsa-miR-183#	-13.2926	0.0218407
hsa-miR-191#	-6.78609	0.0247301
hsa-miR-205	-45.3317	0.0249989
hsa-miR-370	-11.687	0.0269414
hsa-miR-29a	-8.76887	0.0271212
hsa-miR-532-3p	-10.8532	0.028585
hsa-miR-532	-11.1973	0.0292332
hsa-miR-324-3p	-5.60612	0.029651
hsa-miR-20b	-5.53339	0.0310413
hsa-miR-138	-11.3349	0.0312797
hsa-miR-26b	-17.4522	0.0315405
hsa-miR-433	-6.87132	0.0320106
hsa-miR-550	-6.69413	0.0327077
hsa-miR-19b	-11.1638	0.0329202
hsa-miR-136#	-10.7534	0.0334079
hsa-miR-1290	61.8809	0.0338414
hsa-miR-374	-8.80661	0.0355074
hsa-miR-1180	-10.9265	0.0359062
hsa-miR-642	-21.9145	0.0359104
RNU48	-13.5843	0.0366231
hsa-miR-10b	-56.4206	0.038015
mmu-miR-93	-13.8115	0.0395398
hsa-miR-15b	-9.01129	0.0405371
hsa-miR-20a#	-13.2219	0.0415193
hsa-miR-500	-5.62204	0.0416117
hsa-miR-223	-54.5952	0.0424395
hsa-miR-652	-8.70781	0.0433822
hsa-miR-20a	-8.85767	0.0443845
hsa-miR-27b	-5.56261	0.0449729
hsa-miR-19a	-8.78373	0.044981
dme-miR-7	-16.7987	0.0455473
hsa-miR-22#	-40.1579	0.047484
hsa-miR-30c	-5.41914	0.0488771
hsa-miR-30b	-5.54634	0.0491408
hsa-miR-769-5p	-5.47288	0.049161

## Sheet: CR vs. ND
microRNA	Fold change	P value
hsa-miR-106b#	435.056	3.33103e-05
hsa-miR-22	3162.31	0.000100687
hsa-miR-15b#	2081.75	0.000120354
hsa-miR-362	9.93181	0.000160588
hsa-miR-18b	115.038	0.000186232
hsa-miR-502-3p	12.5184	0.000196068
hsa-miR-183	58.2098	0.000485501
hsa-miR-545	12.5483	0.0012674
mmu-miR-140	15.8159	0.00229156
hsa-miR-340#	17.1392	0.00249202
hsa-miR-625	7.76143	0.00290253
hsa-miR-362-3p	6.25988	0.0034171
hsa-miR-200b	9.17961	0.00492432
hsa-miR-190b	5.46035	0.00510426
hsa-miR-32	6.00749	0.00594414
hsa-miR-500	6.71082	0.00634103
hsa-miR-20a#	11.2248	0.00725435
hsa-miR-195	7.7916	0.00766277
hsa-miR-212	-5.32786	0.00887202
hsa-miR-18a	19.7123	0.0116827
RNU48	27.4768	0.0117858
hsa-miR-191#	8.82402	0.0118913
hsa-let-7d	6.10482	0.0131955
hsa-miR-200c	19.7056	0.0132793
RNU48	30.4579	0.0152513
hsa-miR-624	13.5088	0.0162035
hsa-miR-151-5P	6.63564	0.0171746
hsa-miR-183#	10.6837	0.017812
hsa-miR-142-5p	5.1004	0.0215354
hsa-miR-196b	5.39047	0.023813
hsa-miR-15a#	17.1933	0.0256304
hsa-miR-15b	15.7088	0.0266847
hsa-miR-30d#	6.92793	0.0303803
hsa-miR-652	9.85634	0.0318892
hsa-miR-133b	-18.7832	0.0324446
hsa-miR-501	36.6218	0.0330356
hsa-miR-424#	17.3303	0.0345844
hsa-miR-144#	88.0407	0.0405098
hsa-miR-148b#	5.31044	0.0420094
hsa-miR-454	6.1418	0.0436263
hsa-miR-142-3p	6.12435	0.0446559
hsa-miR-10b	42.3144	0.0464711
hsa-miR-374	6.23116	0.0480943

## Sheet: RE vs. CR
microRNA	Fold change	P value
hsa-miR-545	-73.6404	6.29962e-05
hsa-miR-103	-8188.82	0.000127026
hsa-miR-502	-18.058	0.000148535
hsa-miR-18b	-88.4771	0.000220341
hsa-miR-200b	-47.3291	0.000344307
hsa-miR-130a	-21.6661	0.000436625
hsa-miR-517a	-22.6632	0.000454275
hsa-miR-361	-22.9847	0.000471351
hsa-miR-15b	-148.889	0.000509218
mmu-miR-491	-28.3847	0.000527911
hsa-miR-181a-2#	-6.18474	0.000581177
RNU48	-1175.26	0.000631833
hsa-miR-190b	-25.511	0.000671538
mmu-miR-93	-116.984	0.000701889
hsa-miR-340#	-79.973	0.000764555
hsa-miR-424#	-134.272	0.00096448
hsa-let-7g#	-20.8649	0.00115186
hsa-miR-106b#	-199.683	0.0011768
hsa-miR-548d-5p	-15.1064	0.00123041
hsa-miR-192#	-25.0707	0.00124132
hsa-miR-223	-186.375	0.00131948
hsa-miR-374	-94.6385	0.00140351
hsa-miR-501	-41.8601	0.0014274
hsa-miR-125a-5p	-36.6454	0.0015495
hsa-miR-142-5p	-9.29797	0.00167472
hsa-miR-505#	-24.8454	0.00178355
hsa-miR-500	-39.7443	0.00183279
hsa-miR-196b	-37.9034	0.00186113
hsa-miR-141	-29.2679	0.00194674
hsa-miR-1270	-22.9784	0.00194941
hsa-miR-30d#	-12.9202	0.00195435
hsa-miR-9#	-5.00391	0.00202606
hsa-miR-625	-23.2543	0.00205517
hsa-miR-144#	-328.708	0.00209623
hsa-miR-296	-607.092	0.00217686
hsa-miR-324-5p	-116.53	0.00219544
hsa-miR-135b	-5.72104	0.00220375
mmu-miR-140	-117.615	0.00224056
hsa-miR-101	-36.8408	0.00239789
hsa-miR-15a#	-81.8721	0.00244956
hsa-miR-183	-198.812	0.00246615
hsa-miR-660	-46.0759	0.00249957
hsa-miR-21	-36.8789	0.00253973
hsa-miR-197	-56.6413	0.00275628
hsa-miR-579	-28.602	0.00294463
hsa-miR-362-3p	-14.84	0.00298437
hsa-miR-18a	-58.8233	0.00308502
dme-miR-7	-155.626	0.00310994
hsa-miR-500	-29.2086	0.00323408
hsa-miR-194	-115.01	0.00345359
hsa-miR-15b#	-2770.3	0.00348483
hsa-miR-148b#	-39.8292	0.00355767
hsa-miR-543	-30.7125	0.00362313
hsa-miR-23a#	-16.6942	0.00369169
hsa-miR-148a	-73.4416	0.00379631
hsa-miR-378	-81.1492	0.00383367
hsa-miR-429	-7.30494	0.00383428
hsa-miR-671-3p	-59.7779	0.00398618
hsa-miR-624	-80.0051	0.0040295
hsa-miR-330	-38.2805	0.0040662
hsa-miR-345	-74.3465	0.00408671
hsa-miR-26b	-116.074	0.00411056
hsa-miR-363	-59.3783	0.00421268
RNU48	-1021.03	0.0042901
hsa-miR-26a	-37.2336	0.00459483
hsa-miR-195	-45.6716	0.00461506
hsa-miR-519d	-7.82932	0.00464673
hsa-miR-143	-47.238	0.00468506
hsa-miR-16-1#	-49.8321	0.00469367
hsa-miR-27b	-37.6557	0.00479229
hsa-miR-27a	-29.1249	0.00512269
hsa-miR-331	-57.5729	0.00518499
hsa-miR-340	-7.14551	0.0052004
hsa-miR-212	-9.14046	0.0052668
hsa-miR-135a	-11.8549	0.00529358
hsa-miR-454	-89.8084	0.00538258
hsa-miR-106b	-119.161	0.00541201
hsa-miR-576-3p	-46.1687	0.00553053
hsa-miR-16	-148.439	0.0055658
hsa-let-7e	-14.1522	0.00570967
hsa-miR-214#	-64.4892	0.00581334
hsa-miR-335	-11.6136	0.00584407
hsa-miR-532	-152.806	0.005949
hsa-miR-20a#	-51.4231	0.00595865
hsa-miR-28	-23.0283	0.00602914
hsa-miR-130b	-7.12196	0.00605909
hsa-miR-25	-231.483	0.00610762
hsa-miR-32	-18.4087	0.00614027
hsa-miR-192	-145.152	0.00631479
hsa-miR-142-3p	-29.3406	0.00648871
hsa-miR-24-2#	-12.3051	0.00652558
hsa-miR-628-3p	-20.6109	0.00657115
hsa-miR-22#	-131.646	0.00657145
hsa-miR-532-3p	-92.6	0.00662536
hsa-miR-1180	-95.4896	0.00669582
hsa-miR-31	-95.1196	0.00681793
hsa-miR-19a	-91.613	0.00699042
hsa-miR-185	-93.2921	0.00703407
hsa-miR-22	-57.2877	0.00719111
hsa-miR-138	-75.1797	0.00727822
hsa-miR-502-3p	-72.6223	0.00740317
hsa-miR-652	-58.5404	0.00746568
hsa-miR-301	-113.752	0.00748624
hsa-let-7g	-23.5658	0.00757825
hsa-miR-210	-79.019	0.00779023
hsa-miR-19b-1#	-24.7803	0.00787448
hsa-miR-30b	-118.594	0.00789938
hsa-miR-744	-36.3903	0.00802716
hsa-miR-362	-29.3122	0.00811508
hsa-miR-30e-3p	-15.6347	0.0082975
hsa-miR-886-5p	-92.2574	0.00875105
mmu-miR-451	-188.371	0.00898226
hsa-miR-301b	-11.5205	0.00910235
hsa-miR-328	-475.689	0.00915662
hsa-miR-20b	-36.8484	0.0091809
hsa-miR-629	-23.1995	0.00927044
hsa-let-7d	-14.4165	0.00934253
mmu-miR-96	-11.7955	0.00937625
hsa-miR-19b	-119.016	0.0104346
hsa-miR-30c	-118.827	0.0106832
hsa-miR-10b	-254.734	0.0106834
hsa-miR-324-3p	-58.7528	0.010723
hsa-miR-106a	-72.9967	0.0107817
hsa-miR-17	-74.0126	0.0108087
hsa-miR-145#	-40.7113	0.0111827
hsa-miR-199a-3p	-22.786	0.0113565
hsa-miR-616	-8.06763	0.0116473
hsa-miR-589	-20.1295	0.0117088
mmu-miR-374-5p	-36.7842	0.011721
hsa-miR-598	-146.957	0.0122762
hsa-miR-423-5p	-29.2636	0.012446
hsa-miR-629	-12.5019	0.0125356
hsa-miR-24	-45.8828	0.0126307
hsa-miR-191	-93.2077	0.0128911
hsa-miR-29c	-116.545	0.0130986
hsa-miR-337-5p	-18.913	0.0131983
hsa-miR-29b	-29.3032	0.0134005
hsa-miR-193a-5p	-36.2839	0.0134879
hsa-miR-505	-152.398	0.0135831
hsa-miR-550	-129.897	0.0136176
hsa-miR-589	-5.57961	0.0136419
hsa-miR-10a	-29.1946	0.0137461
hsa-miR-1255B	-15.5552	0.0137829
hsa-miR-517c	-14.3742	0.0138518
hsa-miR-152	-93.7525	0.0141513
hsa-miR-642	-45.4018	0.0143597
hsa-miR-548c-5p	-7.39957	0.0150826
hsa-let-7b	-39.5631	0.0153365
hsa-miR-92a	-288.861	0.0156242
hsa-miR-26b#	-12.4991	0.01565
hsa-miR-551a	-7.68225	0.0158378
hsa-miR-223#	-40.3743	0.0160079
hsa-miR-221	-29.5517	0.0161874
hsa-miR-29b-2#	-20.4332	0.0164163
hsa-miR-34a	-18.4349	0.016615
hsa-miR-550	-12.6318	0.0167458
hsa-miR-656	-12.6369	0.0169571
hsa-miR-886-3p	-29.1851	0.0171393
hsa-miR-99b	-153.175	0.0175133
hsa-miR-224	-115.628	0.0175774
hsa-miR-339-3p	-36.0243	0.0179711
hsa-miR-450a	-19.989	0.018196
hsa-miR-126	-23.4221	0.0182739
hsa-miR-455	-29.6743	0.0184336
hsa-let-7c	-23.2112	0.0186891
hsa-miR-205	-37.2302	0.0188255
hsa-miR-29a	-14.5868	0.0190899
hsa-miR-592	-8.00883	0.0191391
hsa-miR-148b	-15.221	0.0193106
hsa-miR-191#	-40.696	0.0196324
hsa-miR-20a	-57.7946	0.0196816
hsa-miR-27b#	-6.47075	0.0198169
hsa-miR-183#	-219.495	0.0203626
hsa-miR-203	-36.6493	0.0206776
hsa-miR-184	-46.0841	0.0216336
hsa-miR-200c	-21.2686	0.0217514
hsa-miR-452	-28.7098	0.0217661
hsa-miR-146b-3p	-36.5294	0.0220606
hsa-miR-25#	-54.3409	0.0222336
hsa-miR-144	-607.487	0.0225063
hsa-miR-151-3p	-100.321	0.0230943
hsa-miR-425-5p	-42.2863	0.0236331
hsa-miR-18a#	-32.3811	0.0236707
hsa-miR-99b#	-25.9589	0.0238243
hsa-miR-33a#	-10.0853	0.023902
hsa-miR-182	-29.9066	0.0242296
hsa-miR-204	-29.4968	0.0245286
hsa-miR-193b#	-34.3402	0.0246082
hsa-miR-486-3p	-114.456	0.0253454
hsa-miR-885-5p	-988.376	0.0262238
hsa-miR-720	-99.3114	0.0269272
hsa-miR-512-3p	-18.3429	0.0280375
rno-miR-7#	-15.9769	0.0302406
hsa-miR-320B	-15.5181	0.0315463
mmu-miR-187	-14.8188	0.0316222
hsa-miR-145	-74.3238	0.031735
hsa-miR-190	-30.0815	0.0329199
hsa-miR-323-3p	-35.9382	0.0334004
hsa-miR-151-5P	-38.7018	0.033474
hsa-miR-1291	-9.88092	0.0345682
hsa-miR-410	-59.5081	0.0349305
hsa-miR-941	-17.657	0.0352968
hsa-miR-365	-73.8633	0.03594
hsa-miR-31#	-8.06785	0.0360421
hsa-miR-199a	-7.07228	0.0361111
hsa-miR-942	-129.386	0.0367956
hsa-miR-193b	-30.3196	0.0374924
hsa-miR-34b	-14.4052	0.037812
hsa-miR-425#	-19.7876	0.0410739
hsa-miR-122	-57.7221	0.0428959
hsa-miR-484	-289.543	0.0435898
hsa-miR-140-3p	-94.3052	0.0438074
hsa-miR-545#	-6.31932	0.0439355
RNU44	-88.6231	0.0443944
hsa-miR-17#	-15.9006	0.0463167
hsa-miR-590-5p	-116.145	0.0478131
hsa-miR-127	-36.9729	0.0479469
hsa-miR-411	-11.6781	0.0496809
