# Supplementary material for: Expression of miR-652-3p and Effect on Apoptosis and Drug Sensitivity in Pediatric Acute Lymphoblastic Leukemia
Source: Biomed Res Int. 2018 Jun 5;2018:5724686. doi: 10.1155/2018/5724686 (PMC6008837; doi:10.1155/2018/5724686)
Supplement: Supplementary Materials — Supplementary Table 1: the expression profiles of circulating miRNAs were analyzed and compared among healthy controls and pediatric patients with ALL at new diagnosis (ND), complete remission (CR), and relapse (RE), using the qRT-PCR-based TaqMan low-density miRNA arrays. Supplementary Table 2: summary of the target prediction for miR-652-3p. Supplementary Table 3: the possible biological targets of miR-652-3p predicted by Target Scan software. Supplementary Table 4: the possible biological targets of miR-652-3p predicted by microRNA.org database. Supplementary Table 5: the possible biological targets of miR-652-3p predicted by miRDB database. [file 5724686.f1.zip › Supplementary Table 2 Summary of target prediction.xlsx]

## Sheet: Supplementary Table 2
Gene	TargetScan	microRNA.org	miRDB	Frequency
ISL1	yes	yes	yes	3
TNRC6A	yes	yes	yes	3
KCNB1	yes	yes		2
CAPZB		yes	yes	2
KCTD10		yes	yes	2
LLGL1		yes	yes	2
NPTN		yes	yes	2
VCPIP1		yes	yes	2
ACVR2B	yes			1
CUX1	yes			1
GGCX	yes			1
PSKH1	yes			1
STK35	yes			1
ABCA13		yes		1
ABCA17P		yes		1
ABCB4		yes		1
ACACB		yes		1
ACAD9		yes		1
ACAP2		yes		1
ACSF3		yes		1
ACTA1		yes		1
ACTR1B		yes		1
ADAP2		yes		1
ADPGK		yes		1
ADPRHL2		yes		1
AKAP6		yes		1
ALCAM		yes		1
ALG6		yes		1
AMY2B		yes		1
ANKLE1		yes		1
ANXA8		yes		1
ANXA8L1		yes		1
ANXA8L2		yes		1
AP1G1		yes		1
ARHGAP10		yes		1
ARHGEF10		yes		1
ARHGEF3		yes		1
ARHGEF6		yes		1
ARMC10		yes		1
ASF1B		yes		1
ASNA1		yes		1
ATG16L1		yes		1
ATP5F1		yes		1
ATP9A		yes		1
ATPIF1		yes		1
BAD		yes		1
BAI2		yes		1
BASE		yes		1
BCL11A		yes		1
BEND6		yes		1
BEYLA		yes		1
BGN		yes		1
BRD3		yes		1
BRIP1		yes		1
BSG		yes		1
BTAF1		yes		1
C10orf57		yes		1
C11orf73		yes		1
C12orf54		yes		1
C12orf73		yes		1
C15orf21		yes		1
C16orf70		yes		1
C16orf82		yes		1
C1orf151		yes		1
C1orf83		yes		1
C1orf86		yes		1
C20orf114		yes		1
C3orf15		yes		1
C3orf20		yes		1
C3orf34		yes		1
C3orf50		yes		1
C6orf217		yes		1
C7orf42		yes		1
C9orf3		yes		1
CASP6		yes		1
CCDC142		yes		1
CCDC66		yes		1
CCRN4L		yes		1
CCS		yes		1
CD3D		yes		1
CDC40		yes		1
CDC42BPB		yes		1
CDCP2		yes		1
CDK4		yes		1
CHD4		yes		1
CIRBP		yes		1
CLDN18		yes		1
CLEC4G		yes		1
CMAS		yes		1
CMTM1		yes		1
COMMD9		yes		1
CORO1A		yes		1
CORO7		yes		1
COX19		yes		1
CR1		yes		1
CRELD1		yes		1
CRISPLD1		yes		1
CRNKL1		yes		1
CTSS		yes		1
CUL4B		yes		1
DCTN4		yes		1
DHX57		yes		1
DIRC2		yes		1
DIS3L2		yes		1
DLC1		yes		1
DLEU7		yes		1
DNAH10		yes		1
DNAJC2		yes		1
DPAGT1		yes		1
DPYD		yes		1
DTNA		yes		1
E2F7		yes		1
EEF1A1P9		yes		1
EFS		yes		1
EIF3A		yes		1
ELN		yes		1
EOMES			yes	1
EPHX2		yes		1
ERLIN1		yes		1
EXOC6		yes		1
FAM108C1		yes		1
FAM32A		yes		1
FAM46B		yes		1
FAM66C		yes		1
FAM71D		yes		1
FAM71F2			yes	1
FAM81A		yes		1
FASLG		yes		1
FBXL17		yes		1
FBXL21		yes		1
FERMT1		yes		1
FLJ23867		yes		1
FOSL2		yes		1
FOXRED1		yes		1
FUCA1		yes		1
FXYD6		yes		1
GABRB3		yes		1
GADD45A		yes		1
GALC		yes		1
GALNT11		yes		1
GBGT1		yes		1
GFRA4		yes		1
GHRL		yes		1
GLIPR2		yes		1
GNAO1		yes		1
GNAS		yes		1
GNAZ		yes		1
GNL1		yes		1
GOLGA6L1		yes		1
GOLGA6L6		yes		1
GRB7		yes		1
GRK5		yes		1
GTF2IP1		yes		1
GUCA1A		yes		1
HCP5		yes		1
HDGFRP2		yes		1
HEATR2		yes		1
HIBADH		yes		1
HLCS		yes		1
HMBS		yes		1
HNRNPAB		yes		1
HOXB13		yes		1
HOXB4		yes		1
HSD3B7		yes		1
HSPA8		yes		1
HSPB2		yes		1
HTR1D		yes		1
IGF2BP2		yes		1
INADL		yes		1
IPPK		yes		1
ITGA7		yes		1
ITGAL		yes		1
ITPA		yes		1
ITSN1		yes		1
JPH3		yes		1
KCNJ11		yes		1
KCNK2		yes		1
KCNMB1		yes		1
KDM4C		yes		1
KIAA1217		yes		1
KIAA1529		yes		1
KIAA1614		yes		1
KIF21B		yes		1
KLC4		yes		1
KLHL32		yes		1
KPNA1		yes		1
KRBA2		yes		1
L3MBTL3		yes		1
LCN8		yes		1
LEKR1		yes		1
LGI1		yes		1
LOC100128398		yes		1
LOC100132169		yes		1
LOC100132832		yes		1
LOC100133612		yes		1
LOC100272146		yes		1
LOC100288797		yes		1
LOC158435		yes		1
LOC197350		yes		1
LOC202781		yes		1
LOC284861		yes		1
LOC285043		yes		1
LOC338579		yes		1
LOC401074		yes		1
LOC401463		yes		1
LOC554223		yes		1
LOC643648		yes		1
LOC84856		yes		1
LRBA		yes		1
LRRC28		yes		1
LSM14A		yes		1
LUC7L3		yes		1
MAN2A2		yes		1
MAP3K12		yes		1
MARVELD2		yes		1
MATN2		yes		1
MATN3		yes		1
MCCC2		yes		1
MCM4		yes		1
MED27		yes		1
MGA		yes		1
MGC70870		yes		1
MGST2		yes		1
MKI67		yes		1
MLL		yes		1
MON1A		yes		1
MPP2		yes		1
MPPE1		yes		1
MRC2		yes		1
MTERFD3		yes		1
MTMR1		yes		1
MUC4		yes		1
MYO16		yes		1
MYOZ3		yes		1
NBPF22P		yes		1
NCOR2		yes		1
NCRNA00213		yes		1
NDUFA10		yes		1
NF2		yes		1
NFE2L3		yes		1
NISCH		yes		1
NKX2-3		yes		1
NMT1		yes		1
NOD2		yes		1
NR4A3		yes		1
NRG1		yes		1
NRP2		yes		1
NRSN1		yes		1
NSMCE4A		yes		1
NT5C1B		yes		1
NXF1		yes		1
OXNAD1		yes		1
OXR1		yes		1
P2RX1		yes		1
PBX4		yes		1
PDE4DIP		yes		1
PDLIM7		yes		1
PDPK1		yes		1
PERP		yes		1
PHC2		yes		1
PHKB		yes		1
PI15		yes		1
PIGK		yes		1
PIPOX		yes		1
PKP4		yes		1
PLAG1		yes		1
PLBD2		yes		1
PLEKHB2		yes		1
PLEKHF2		yes		1
PLK3		yes		1
PLXDC1		yes		1
PMS2L11		yes		1
PMS2L2		yes		1
PMS2L3		yes		1
PMS2L5		yes		1
PNPLA1		yes		1
PNPT1		yes		1
POLDIP2		yes		1
POLR1C		yes		1
POU2F1		yes		1
PPHLN1		yes		1
PPIL2		yes		1
PPP1R1C		yes		1
PPP2R3A		yes		1
PRKCZ		yes		1
PRPF4		yes		1
PRRX1		yes		1
PSEN1		yes		1
PSEN2		yes		1
PTGFR		yes		1
QSER1		yes		1
QTRTD1		yes		1
RAB3IP		yes		1
RAB40B		yes		1
RAGE		yes		1
RAI14		yes		1
RALY		yes		1
RBBP7		yes		1
RBM46		yes		1
RCOR3		yes		1
RIMKLB		yes		1
RNF121		yes		1
RNF126		yes		1
RNF180		yes		1
RNF34		yes		1
RNF7		yes		1
RPH3A		yes		1
RPS9		yes		1
RSU1		yes		1
RUNDC2B		yes		1
SACS		yes		1
SAR1B		yes		1
SAT1		yes		1
SCN8A		yes		1
SCPEP1		yes		1
SEC61A2		yes		1
SERBP1		yes		1
SEZ6		yes		1
SGK2		yes		1
SGK269		yes		1
SH2D6		yes		1
SH3RF2		yes		1
SIT1		yes		1
SLAIN1		yes		1
SLC11A1		yes		1
SLC16A4		yes		1
SLC17A5		yes		1
SLC25A26		yes		1
SLC29A3		yes		1
SLC38A6		yes		1
SLC39A9		yes		1
SLCO2A1		yes		1
SLIT1		yes		1
SLMAP		yes		1
SMAP2		yes		1
SMC4		yes		1
SOST		yes		1
SOX2OT		yes		1
SPATA24		yes		1
SRD5A1		yes		1
SREBF1		yes		1
SRM		yes		1
SRRM1		yes		1
SS18		yes		1
ST3GAL3		yes		1
ST7L		yes		1
STAG3L3		yes		1
SUZ12P		yes		1
SYNGR2		yes		1
SYTL1		yes		1
TANC1		yes		1
TBC1D17		yes		1
TCF12		yes		1
TCF15		yes		1
TDGF3		yes		1
TDH		yes		1
TGFBRAP1			yes	1
TGM4		yes		1
TIPARP		yes		1
TIRAP		yes		1
TLR8		yes		1
TM6SF1		yes		1
TM9SF1		yes		1
TMEM131		yes		1
TMEM154		yes		1
TMEM217		yes		1
TMEM57		yes		1
TMEM70		yes		1
TMSB15B		yes		1
TNFRSF10D		yes		1
TOM1		yes		1
TOM1L1		yes		1
TOX		yes		1
TP53		yes		1
TP53INP1		yes		1
TRIM41		yes		1
TRMT112		yes		1
TRPM8		yes		1
TSPYL5		yes		1
TTC12		yes		1
TTTY15		yes		1
TUSC3		yes		1
TXNDC2		yes		1
TXNRD2		yes		1
UBQLN1		yes		1
UGT2B15		yes		1
UGT2B4		yes		1
UNC119B		yes		1
UNC80		yes		1
VEGFA		yes		1
VLDLR		yes		1
VPS24		yes		1
VPS4B		yes		1
VWA2		yes		1
WBP11P1		yes		1
WIZ		yes		1
YWHAH		yes		1
ZBTB1		yes		1
ZBTB37		yes		1
ZC3H12D		yes		1
ZFAND5		yes		1
ZFP1		yes		1
ZFYVE1		yes		1
ZMYM2		yes		1
ZNF131		yes		1
ZNF263		yes		1
ZNF333		yes		1
ZNF362		yes		1
ZNF517		yes		1
ZNF573		yes		1
ZNF581		yes		1
ZNF595		yes		1
ZNF677		yes		1
ZNF714		yes		1
ZNF793		yes		1
ZNF841		yes		1
