# Supplementary material for: Expression of miR-652-3p and Effect on Apoptosis and Drug Sensitivity in Pediatric Acute Lymphoblastic Leukemia
Source: Biomed Res Int. 2018 Jun 5;2018:5724686. doi: 10.1155/2018/5724686 (PMC6008837; doi:10.1155/2018/5724686)
Supplement: Supplementary Materials — Supplementary Table 1: the expression profiles of circulating miRNAs were analyzed and compared among healthy controls and pediatric patients with ALL at new diagnosis (ND), complete remission (CR), and relapse (RE), using the qRT-PCR-based TaqMan low-density miRNA arrays. Supplementary Table 2: summary of the target prediction for miR-652-3p. Supplementary Table 3: the possible biological targets of miR-652-3p predicted by Target Scan software. Supplementary Table 4: the possible biological targets of miR-652-3p predicted by microRNA.org database. Supplementary Table 5: the possible biological targets of miR-652-3p predicted by miRDB database. [file 5724686.f1.zip › Supplementary Table 3 Target prediction by TargetScan.xlsx]

## Sheet: Supplementary Table 3
Target gene	Representative transcript	Gene name	total	8mer	7mer-m8	7mer-1A	total	8mer	7mer-m8	7mer-1A	Repre- sentative miRNA	Total context+ score	Aggregate P CT
ISL1	NM_002202	ISL LIM homeobox 1	1	1	0	0	0	0	0	0	hsa-miR-652	-0.68	N/A
TNRC6A	NM_014494	trinucleotide repeat containing 6A	1	1	0	0	0	0	0	0	hsa-miR-652	-0.62	N/A
KCNB1	NM_004975	potassium voltage-gated channel, Shab-related subfamily, member 1	1	1	0	0	0	0	0	0	hsa-miR-652	-0.47	N/A
GGCX	NM_000821	gamma-glutamyl carboxylase	1	0	0	1	1	0	1	0	hsa-miR-652	-0.29	N/A
ACVR2B	NM_001106	activin A receptor, type IIB	1	0	1	0	0	0	0	0	hsa-miR-652	-0.25	N/A
STK35	NM_080836	serine/threonine kinase 35	1	0	1	0	0	0	0	0	hsa-miR-652	-0.2	N/A
CUX1	NM_001202543	cut-like homeobox 1	1	0	0	1	0	0	0	0	hsa-miR-652	-0.2	N/A
PSKH1	NM_006742	protein serine kinase H1	1	0	1	0	0	0	0	0	hsa-miR-652	-0.11	N/A
