# Supplementary material for: Expression of miR-652-3p and Effect on Apoptosis and Drug Sensitivity in Pediatric Acute Lymphoblastic Leukemia
Source: Biomed Res Int. 2018 Jun 5;2018:5724686. doi: 10.1155/2018/5724686 (PMC6008837; doi:10.1155/2018/5724686)
Supplement: Supplementary Materials — Supplementary Table 1: the expression profiles of circulating miRNAs were analyzed and compared among healthy controls and pediatric patients with ALL at new diagnosis (ND), complete remission (CR), and relapse (RE), using the qRT-PCR-based TaqMan low-density miRNA arrays. Supplementary Table 2: summary of the target prediction for miR-652-3p. Supplementary Table 3: the possible biological targets of miR-652-3p predicted by Target Scan software. Supplementary Table 4: the possible biological targets of miR-652-3p predicted by microRNA.org database. Supplementary Table 5: the possible biological targets of miR-652-3p predicted by miRDB database. [file 5724686.f1.zip › Supplementary Table 4 Target prediction by microRNA.org.xlsx]

## Sheet: Supplementary Table 4
mirbase_acc	mirna_name	gene_id	gene_symbol	transcript_id	ext_transcript_id	mirna_alignment	alignment	gene_alignment	mirna_start	mirna_end	gene_start	gene_end	genome_coordinates	conservation	align_score	seed_cat	energy	mirsvr_score
MIMAT0003322	hsa-miR-652	166863	RBM46	uc011cim.1	AK302720	guguuggGAUCACCG-CGGUAa	||| |||| |||||	ucacuugCUAAUGGCAGCCAUg	2	15	1239	1260	[hg19:4:155749154-155749175:+]	0.8508	126	0	-20.04	-0.5624
MIMAT0003322	hsa-miR-652	441032	EEF1A1P9	uc003hxt.1	NR_003586	gugUUGGGAUCAC--CG-CGGUAa	|| :||:||| || |||||	uugAAGUCUGGUGAUGCUGCCAUu	2	19	382	405	[hg19:4:106407028-106407051:+]	0.5279	125	0	-20.2	-0.3429
MIMAT0003322	hsa-miR-652	58	ACTA1	uc001htm.2	NM_001100	guGUUGGGAUCACCG-CGGUAa	||||:: || || |||||	aaCAACUUCCGUUGCUGCCAUc	2	20	97	118	[hg19:1:229567128-229567149:-]	0.5066	127	0	-17.53	-0.8328
MIMAT0003322	hsa-miR-652	55298	RNF121	uc001ora.2	NM_018320	guGUUGGGAUCACCG-CGGUAa	||| :|: |||| |||||	ggCAA--UUGUUGGCAGCCAUg	2	20	752	771	[hg19:11:71708113-71708132:+]	0.5578	120	0	-16.64	-0.1179
MIMAT0003322	hsa-miR-652	197350	LOC197350	uc002cuf.1	BC111724	gugUUGGGAUCACCGCGGUAa	:|:|| | |||||||	ccaGAUCCCA---GCGCCAUu	2	19	38	55	[hg19:16:3199847-3199864:+]	0.4038	142	7	-17.85	-0.294
MIMAT0003322	hsa-miR-652	9639	ARHGEF10	uc003wpr.2	NM_014629	guGUUGGGAUCAC-CGCGGUAa	|| |:||||| |||||||	ugCAUACUUAGUGAGCGCCAUc	2	20	1110	1131	[hg19:8:1906539-1906560:+]	0.4831	166	7	-25.84	-0.1742
MIMAT0003322	hsa-miR-652	27000	DNAJC2	uc003vbr.1	BC032854	guguUGGGAUCA-CCG-CGGUAa	|:| |||| || |||||	caguAUCAUAGUCUGCAGCCAUa	2	18	50	72	[hg19:7:102978085-102978107:-]	0.5152	120	0	-14.07	-0.5384
MIMAT0003322	hsa-miR-652	3084	NRG1	uc003xiu.2	NM_013956	gugUUGGGAUCA-CCGCGGUAa	|| : |: | |:|||||	uaaAAAUGUGUUAUGUGCCAUa	2	19	146	167	[hg19:8:32622066-32622087:+]	0.771	125	0	-10.24	-0.1509
MIMAT0003322	hsa-miR-652	285175	UNC80	uc002vdk.2	AB058746	gugUUGGGAUCACCGCGG-UAa	:|| ||| ||||||| ||	caaGACGCUAAUGGCGCCUAUa	2	19	2094	2115	[hg19:2:210834459-210834480:+]	0.7189	134	0	-20.71	-0.5033
MIMAT0003322	hsa-miR-652	682	BSG	uc002lpb.2	CR619238	guguugGGAUCACCGCGGUAa	:||:|| |||||||	augcugUCUGGUUGCGCCAUu	2	16	1284	1304	[hg19:19:583130-583150:+]	0.5074	159	7	-21.86	-0.6423
MIMAT0003322	hsa-miR-652	2355	FOSL2	uc002rma.2	NM_005253	guguugggaucacCGCGGUAa	|||||||	gcuuguggcucauGCGCCAUu	2	9	1370	1390	[hg19:2:28636685-28636705:+]	0.5186	140	7	-16.95	-0.1127
MIMAT0003322	hsa-miR-652	6760	SS18	uc002kvm.2	NM_001007559	guGUUG-GGAUCACCG-CGGUAa	||:: :||| | || |||||	gcCAGUAUCUAUUAGCAGCCAUa	2	20	22	44	[hg19:18:23598274-23598296:-]	0.8022	122	0	-13.03	-0.9866
MIMAT0003322	hsa-miR-652	51128	SAR1B	uc003kzr.2	NM_016103	guguUGGGAUCACCGCGGUAa	|||| | |||||||	caucACCCCA---GCGCCAUu	2	18	243	260	[hg19:5:133942380-133942397:-]	0.6623	145	7	-19.77	-0.9901
MIMAT0003322	hsa-miR-652	5257	PHKB	uc002eev.3	NM_000293	guGUUGGGAUCA---CCG-CGGUAa	||| |:|| | ||| |||||	uuCAAGCUUAAUCAAGGCAGCCAUu	2	20	60	84	[hg19:16:47733337-47733361:+]	0.5032	122	0	-17.76	-0.4118
MIMAT0003322	hsa-miR-652	124925	SEZ6	uc002hdp.2	NM_178860	guGUUGGGAUCACCGCGGUAa	:| :||| |||||||	ggUACUCCUCACAGCGCCAUc	2	20	424	444	[hg19:17:27282536-27282556:-]	0.5855	147	7	-17.3	-0.2636
MIMAT0003322	hsa-miR-652	57125	PLXDC1	uc002hrg.2	NM_020405	guGUUG-GGAUCACCG-CGGUAa	:||| ::|| | || |||||	ucUAACAUUUAUUUGCUGCCAUu	2	20	3327	3349	[hg19:17:37220744-37220766:-]	0.5628	122	0	-12.27	-0.1872
MIMAT0003322	hsa-miR-652	84614	ZBTB37	uc001gjp.1	AK057310	guguugGGAUCACCGCGGUaa	:||| | ||||||	ccugcaUCUA-UUGCGCCAaa	3	16	94	113	[hg19:1:173854871-173854890:+]	0.8276	129	0	-13.03	-0.1997
MIMAT0003322	hsa-miR-652	54919	HEATR2	uc003sja.2	BC072425	guGUUGGGAUC-ACCGCGGUAa	::| | || | |||||||	agUGAGCGGAGAUUGCGCCAUu	2	20	2167	2188	[hg19:7:812426-812447:+]	0.5025	146	7	-14.52	-0.254
MIMAT0003322	hsa-miR-652	4771	NF2	uc003agf.3	NM_181832	gugUUGGGA-UCAC--CGCGGUAa	::|::| || | |||||||	cagGGCUUUCAGGGAAGCGCCAUc	2	19	3702	3725	[hg19:22:30094418-30094441:+]	0.5667	144	7	-18.37	-0.1773
MIMAT0003322	hsa-miR-652	26064	RAI14	uc011coj.1	NM_001145520	guGUUGGGAUCACCGC-GGUAa	::||:||| ||| ||||	ccUGACUCUACCAGCGCCCAUa	2	20	1136	1157	[hg19:5:34832006-34832027:+]	0.6148	123	0	-15.9	-0.8468
MIMAT0003322	hsa-miR-652	151242	PPP1R1C	uc002uon.2	CR600208	guguugggaucacCGCGGUAa	|||||||	gagggaaagcacaGCGCCAUc	2	9	171	191	[hg19:2:182819138-182819158:+]	0.5047	140	7	-14.44	-0.283
MIMAT0003322	hsa-miR-652	3836	KPNA1	uc003efe.2	NM_002264	guguuGGGAUCACCGCGGUAa	|:||| |||||||||	cuuucCUCUAUUGGCGCCAUu	2	17	562	582	[hg19:3:122145250-122145270:-]	0.7369	168	7	-24.79	-0.1751
MIMAT0003322	hsa-miR-652	3836	KPNA1	uc003efe.2	NM_002264	guGUUGGGAUCACCGCG-GUAa	:||: ||: | |||| |||	caUAAUACUGUUUGCGCUCAUu	2	20	103	124	[hg19:3:122145708-122145729:-]	0.7691	123	0	-16.03	-0.1588
MIMAT0003322	hsa-miR-652	26135	SERBP1	uc001ddv.2	NM_001018067	gugUUGGGAUC---AC-CGCGGUAa	||| ||:| || |||||||	augAACACUGGAAAUGAGCGCCAUu	2	19	3696	3720	[hg19:1:67875170-67875194:-]	0.5299	152	7	-19.73	-0.126
MIMAT0003322	hsa-miR-652	126231	ZNF573	uc002ohf.2	NM_152360	gugUUGGGAUCACCGCGGUAa	|:: | || |||||||	aagAGUACGAG-CGCGCCAUu	2	19	8	27	[hg19:19:38229366-38229385:-]	0.4439	144	7	-16.01	-0.1817
MIMAT0003322	hsa-miR-652	4585	MUC4	uc011bto.1	NM_018406	guguUGGGAUCACCGCGGUAa	|| :| ||||||||	ccgcACAUUUAAGGCGCCAUu	2	18	47	67	[hg19:3:195473980-195474000:-]	0.558	149	7	-21.51	-0.5439
MIMAT0003322	hsa-miR-652	214	ALCAM	uc003dvx.2	NM_001627	guGUUGGGAUCACCG-CGGUAa	||| ::| |||| |||||	aaCAAGUUU--UGGCAGCCAUg	2	20	203	222	[hg19:3:105293498-105293517:+]	0.6142	120	0	-17.85	-0.6498
MIMAT0003322	hsa-miR-652	6578	SLCO2A1	uc003eqa.3	NM_005630	guGUUGGGAUCACCG-CGGUAa	| |::||:| || |||||	ggCCAUUCUGGAUGCUGCCAUg	2	20	589	610	[hg19:3:133652947-133652968:-]	0.5393	123	0	-17.81	-0.1398
MIMAT0003322	hsa-miR-652	3312	HSPA8	uc001pyo.2	NM_006597	guguugggaUCACCGCGGUAa	| |||| ||||	cuauuuaaaAUUGGCACCAU-	2	13	222	241	[hg19:11:122928201-122928220:-]	0.5134	120	0	-9.93	-0.1067
MIMAT0003322	hsa-miR-652	51738	GHRL	uc010hdj.2	NM_001134944	guGUUGGGAUCACCGCG-GUAa	:|| ::||| |||| |||	ucUAAGUUUAGAAGCGCUCAUc	2	20	27	48	[hg19:3:10327511-10327532:-]	0.5506	123	0	-15.18	-0.5316
MIMAT0003322	hsa-miR-652	55758	RCOR3	uc010psv.1	AK300942	guguugggaucaccGCGGUAa	||||||	agaguuuacaacauCGCCAUc	2	8	1070	1090	[hg19:1:211462578-211462598:+]	0.8139	120	6	-13.84	-0.1258
MIMAT0003322	hsa-miR-652	682	BSG	uc010drr.2	CR611405	guguugGGAUCACCGCGGUAa	:||:|| |||||||	augcugUCUGGUUGCGCCAUu	2	16	189	209	[hg19:19:583130-583150:+]	0.5074	159	7	-21.86	-0.8854
MIMAT0003322	hsa-miR-652	6251	RSU1	uc001ion.2	AK225681	gugUUGGGAUCACCG-CGGUAa	|:::||: |||| |||||	uugAGUUCUGUUGGCAGCCAUa	2	19	1058	1079	[hg19:10:16793439-16793460:-]	0.5019	130	0	-20.98	-0.3939
MIMAT0003322	hsa-miR-652	51164	DCTN4	uc010jhi.2	NM_001135643	guguUGGGAUCACCG-CGGUAa	:|| || |||| |||||	cauuGCCAUAAUGGCUGCCAUu	2	18	492	513	[hg19:5:150090198-150090219:-]	0.5648	129	0	-19.43	-0.2862
MIMAT0003322	hsa-miR-652	1798	DPAGT1	uc001pvm.1	AK095122	gugUUGGGAUCACCG-CGGUAa	::||||| ||| |||||	uaaGGCCCUA--GGCUGCCAUc	2	19	956	975	[hg19:11:118968134-118968153:-]	0.6086	123	0	-22.19	-0.1739
MIMAT0003322	hsa-miR-652	8013	NR4A3	uc004bai.2	NM_173200	guguUGGGAUCACCGCGGUAa	|::| || |||||||	auucAUUC-AGAAGCGCCAUa	2	18	939	958	[hg19:9:102627088-102627107:+]	0.59	147	7	-15.42	-0.6958
MIMAT0003322	hsa-miR-652	26065	LSM14A	uc002nva.3	NM_015578	guGUUGGGAUCACCG-CGGUAa	||:: || |||| |||||	ucCAGUACU--UGGCAGCCAUa	2	20	1520	1539	[hg19:19:34719813-34719832:+]	0.7227	120	0	-15.66	-0.8466
MIMAT0003322	hsa-miR-652	10644	IGF2BP2	uc003fpo.2	NM_006548	guguugggaucacCGCGGUAa	|||||||	uuuaauaggguacGCGCCAUu	2	9	1604	1624	[hg19:3:185361695-185361715:-]	0.6718	140	7	-15.15	-0.2897
MIMAT0003322	hsa-miR-652	9659	PDE4DIP	uc001elw.3	NM_014644	guguugggaucaccGCGGUAa	||||||	auauauguugcuaaCGCCAUa	2	8	902	922	[hg19:1:144851536-144851556:-]	0.6404	120	6	-11.13	-0.1037
MIMAT0003322	hsa-miR-652	5664	PSEN2	uc009xeo.1	NM_000447	guguUGGGAUCACCGCGGUAa	||:||| |:|||||	uuacACUCUA---GUGCCAUa	2	18	64	81	[hg19:1:227083344-227083361:+]	0.6783	133	0	-18.18	-0.1308
MIMAT0003322	hsa-miR-652	5523	PPP2R3A	uc011bma.1	AK302163	guGUUGGGAUCAC---CGCGGUAa	:||: :| ||| |||||||	aaUAAUGUU-GUGAAUGCGCCAUu	2	20	97	119	[hg19:3:135745770-135745792:+]	0.7005	144	7	-19.42	-1.064
MIMAT0003322	hsa-miR-652	7750	ZMYM2	uc001ums.2	NM_197968	guguugggaucacCGCGGUAa	|:|||||	uaugaaugagaauGUGCCAUg	2	9	271	291	[hg19:13:20660425-20660445:+]	0.7222	124	0	-9.75	-0.1211
MIMAT0003322	hsa-miR-652	83690	CRISPLD1	uc003yan.2	NM_031461	guguugggaUCACC-GCGGUAa	||||| ||||||	uaugaggucAGUGGACGCCAUu	2	13	2137	2158	[hg19:8:75946614-75946635:+]	0.5173	124	6	-22.45	-0.2518
MIMAT0003322	hsa-miR-652	441818	WBP11P1	uc010dmc.2	NR_003558	guguugggaUCAC-CGCGGUAa	|||| |||||||	gauugagaaAGUGUGCGCCAUg	2	13	1022	1043	[hg19:18:30092647-30092668:+]	0.5066	151	7	-18.14	-0.1466
MIMAT0003322	hsa-miR-652	51208	CLDN18	uc003ero.1	NM_001002026	gugUUGG-GAUCAC-CGCGGUAa	||:: | :||| |||||||	uggAAUUACAGGUGUGCGCCAUc	2	19	1570	1592	[hg19:3:137751553-137751575:+]	0.5283	152	7	-18.12	-0.1778
MIMAT0003322	hsa-miR-652	26278	SACS	uc001uop.1	AX746526	guguugggaucacCGCGGUAa	|:|||||	gcuguuauauaaaGUGCCAUa	2	9	537	557	[hg19:13:23902999-23903019:-]	0.6476	124	0	-10.04	-0.1151
MIMAT0003322	hsa-miR-652	50650	ARHGEF3	uc003dih.2	NM_001128615	gugUUGGGAUCA-CCGCGGUAa	| :|:| || ||||||||	augAUUCUUUGUAGGCGCCAUc	2	19	1667	1688	[hg19:3:56761610-56761631:-]	0.583	157	7	-21.11	-0.1567
MIMAT0003322	hsa-miR-652	6556	SLC11A1	uc010fvq.1	AK311405	guGUUGG-GAUCACCGCGGUAa	|| || || | |||||||	cuCACCCGCUCCU-GCGCCAUc	2	20	792	812	[hg19:2:219257746-219257766:+]	0.7555	148	7	-18.35	-0.26
MIMAT0003322	hsa-miR-652	51311	TLR8	uc004cve.2	NM_138636	guguugggaucACCGCGGUAa	| |||||||	aagucaugauuUCGCGCCAUa	2	11	9	29	[hg19:X:12940294-12940314:+]	0.5587	142	7	-13.25	-0.9989
MIMAT0003322	hsa-miR-652	682	BSG	uc002loz.2	NM_001728	guguugGGAUCACCGCGGUAa	:||:|| |||||||	augcugUCUGGUUGCGCCAUu	2	16	386	406	[hg19:19:583130-583150:+]	0.5074	159	7	-21.86	-0.8407
MIMAT0003322	hsa-miR-652	23759	PPIL2	uc011aij.1	AK299206	gugUUGGGAUCACCGCGGUAa	||| | |||||||	aagAACAAGAACUGCGCCAUg	2	19	148	168	[hg19:22:22051251-22051271:+]	0.4802	142	7	-13.84	-0.2184
MIMAT0003322	hsa-miR-652	2006	ELN	uc003tzn.2	NM_000501	guGUUGGGAUCACCG-CGGUAa	| ||| | |||| |||||	acCCACCGU--UGGCUGCCAUc	2	20	438	457	[hg19:7:73483468-73483487:+]	0.5989	120	0	-18.3	-0.1442
MIMAT0003322	hsa-miR-652	115572	FAM46B	uc010ofj.1	NM_052943	guguugggaucaCCGCGGUAa	||||||||	cgguggggugcaGGCGCCAUu	2	10	244	264	[hg19:1:27332171-27332191:-]	0.5747	145	7	-17.09	-0.1366
MIMAT0003322	hsa-miR-652	2794	GNL1	uc011gsx.1	NM_005275	guguugggaucacCGCGGUAa	|||||||	-guuccucgcccaGCGCCAUc	2	9	1	20	[hg19:6_mann_hap4:1861901-1861920:-]	0.6854	140	7	-15.86	-0.6445
MIMAT0003322	hsa-miR-652	55041	PLEKHB2	uc002tsg.3	NM_001100623	guGUUGGGAUCA-CCG-CGGUAa	||::|: | | ||| |||||	gcCAGUCUCAUUAGGCAGCCAUa	2	20	2326	2348	[hg19:2:131906672-131906694:+]	0.5447	122	0	-16.37	-0.1099
MIMAT0003322	hsa-miR-652	138307	LCN8	uc004cjc.1	BC042109	guguUGGGAUCA-CCGCGGUAa	||::| | |||||||	cugcACUUUUCUCUGCGCCAUu	2	18	93	114	[hg19:9:139650705-139650726:-]	0.5024	144	7	-20.57	-0.4087
MIMAT0003322	hsa-miR-652	80714	PBX4	uc002nmy.2	NM_025245	gugUUGGGAU-CAC-CG-CGGUAa	|:| ||: ||| || |||||	aagAGCGCUGCGUGAGCUGCCAUg	2	19	20	43	[hg19:19:19672791-19672814:-]	0.5096	120	0	-18.92	-0.1687
MIMAT0003322	hsa-miR-652	284861	LOC284861	uc002zul.3	AK128837	guguugggaucacCGCGGUAa	|||||||	uccugaggaaaaaGCGCCAUc	2	9	1936	1956	[hg19:22:21540456-21540476:+]	0.6421	140	7	-16.84	-0.3365
MIMAT0003322	hsa-miR-652	4355	MPP2	uc002ieo.1	NM_005374	guGUUGGGAUCACCGCGGUAa	||||:| || ||||||||	caCAACUCCAGAGGCGCCAUu	2	20	1030	1050	[hg19:17:41954125-41954145:-]	0.4975	175	7	-30.83	-0.145
MIMAT0003322	hsa-miR-652	7047	TGM4	uc003coc.3	NM_003241	guGUUGGGA--UCACCG-CGGUAa	|:||||| || || |||||	gaCGACCCUUGAGAAGCUGCCAUa	2	20	363	386	[hg19:3:44955580-44955603:+]	0.5258	126	0	-23.04	-0.4808
MIMAT0003322	hsa-miR-652	162239	ZFP1	uc002fdo.2	NM_153688	guguugggaucacCGCGGUaa	||||||	uaaggaauaaaaaGCGCCAgc	3	9	1621	1641	[hg19:16:75205853-75205873:+]	0.6451	120	0	-10.81	-0.1307
MIMAT0003322	hsa-miR-652	3745	KCNB1	uc002xur.1	NM_004975	gugUUGGGAUCACCGCGGUAa	|| :|| | |||||||	gggAAGUCU-CU-GCGCCAUa	2	19	531	549	[hg19:20:47988971-47988989:-]	0.6289	142	7	-14.25	-0.8003
MIMAT0003322	hsa-miR-652	83787	ARMC10	uc003vax.1	NM_001161009	guGUUGGGAUC-ACCGCGGUAa	::| |: || | |||||||	agUGAGCUGAGAUAGCGCCAUu	2	20	859	880	[hg19:7:102739859-102739880:+]	0.5087	150	7	-15.88	-0.1587
MIMAT0003322	hsa-miR-652	80196	RNF34	uc001ual.1	NM_025126	guguUGGGAUCACCGCGGUAa	| |||: | |||||||	agucAGCCUGUUUGCGCCAUg	2	18	253	273	[hg19:12:121861632-121861652:+]	0.5016	157	7	-20.1	-0.2514
MIMAT0003322	hsa-miR-652	7991	TUSC3	uc003wwr.2	CR608157	guGUUGGGAUCACCG-CGGUAa	||||| | || || |||||	gcCAACCAU-GU-GCAGCCAUc	2	20	205	224	[hg19:8:15556641-15556660:+]	0.5224	123	0	-19.24	-0.6083
MIMAT0003322	hsa-miR-652	23505	TMEM131	uc002syh.3	NM_015348	guGUUGGGAUCACCGCGGUaa	|||: :|| | ||||||	cuCAAUAUUA-U-GCGCCAag	3	20	426	444	[hg19:2:98373118-98373136:-]	0.7538	131	0	-12.77	-0.4538
MIMAT0003322	hsa-miR-652	100133612	LOC100133612	uc001alh.3	BC062787	guguugGGAUCACC-GCGGUAa	||| |||| ||||||	ggugcaCCU-GUGGCCGCCAUg	2	16	198	218	[hg19:1:3817165-3817185:+]	0.495	125	6	-21.62	-0.1151
MIMAT0003322	hsa-miR-652	122060	SLAIN1	uc001vkk.1	NM_001040153	guGUUGGGAU--CACCGCGGUAa	||||:: | | |:|||||	aaCAACUUAAAUUUUGUGCCAUa	2	20	507	529	[hg19:13:78337862-78337884:+]	0.7815	134	0	-15.25	-0.2156
MIMAT0003322	hsa-miR-652	83440	ADPGK	uc002avf.3	NM_031284	guGUUGGGAUCACCGCGGUAa	||:::: | |||||||	ccCAGUUUAUGCAGCGCCAUc	2	20	241	261	[hg19:15:73044421-73044441:-]	0.5197	147	7	-15.61	-0.4399
MIMAT0003322	hsa-miR-652	6487	ST3GAL3	uc010okj.1	AK301829	guGUUGGGAUCACCGCGGUAa	:| ||| || ||||||||	ccUACCCCGAG-GGCGCCAUg	2	20	1178	1197	[hg19:1:44365278-44365297:+]	0.8033	161	7	-24.85	-0.1288
MIMAT0003322	hsa-miR-652	6487	ST3GAL3	uc010okj.1	AK301829	guguUGGGAUCACCGC-GGUAa	||: |:| |||| ||||	----ACUAUGGCGGCGCCCAUg	2	18	1	18	[hg19:1:44173218-44173235:+]	0.678	125	0	-16.08	-0.1278
MIMAT0003322	hsa-miR-652	7786	MAP3K12	uc001sdm.1	NM_006301	guguugggAUCACCGCGGUaa	|| ||||||	uauauauaUAUAUGCGCCAca	3	14	61	81	[hg19:12:53874885-53874905:-]	0.6043	121	0	-9.88	-0.3408
MIMAT0003322	hsa-miR-652	3182	HNRNPAB	uc003miu.2	NM_031266	guguugggaucACCGCGGUAa	| |||||||	cugagaggccaUAGCGCCAUc	2	11	197	217	[hg19:5:177637821-177637841:+]	0.5874	142	7	-14.68	-0.3525
MIMAT0003322	hsa-miR-652	3182	HNRNPAB	uc003miu.2	NM_031266	guguUGGGAUCACCGCGGUAa	|: :|| | |||:|||	uuuuAUAUUAUUUGCGUCAUa	2	18	366	386	[hg19:5:177637990-177638010:+]	0.7334	137	0	-9.19	-0.2429
MIMAT0003322	hsa-miR-652	10278	EFS	uc001wjo.2	NM_005864	guGUUGGGAUCAC----CG-CGGUAa	||:||||:||| || |||||	agCAGCCCUGGUGCUCAGCAGCCAUa	2	20	594	619	[hg19:14:23825816-23825841:-]	0.5654	130	0	-28.15	-0.2945
MIMAT0003322	hsa-miR-652	1263	PLK3	uc001cmo.2	CR607047	gugUUGGGAUCACCGCGGUAa	:|:||| |||||||	ccaGAUCCU----GCGCCAUg	2	19	600	616	[hg19:1:45268795-45268811:+]	0.709	141	7	-17.68	-0.546
MIMAT0003322	hsa-miR-652	100132832	LOC100132832	uc003ufy.2	NR_028058	guGUUGGGAU-CAC-CGCGGUAa	| || ||| || |||||||	uuCUACGCUACCUGUGCGCCAUa	2	20	833	855	[hg19:7:76673047-76673069:+]	0.6267	153	7	-22.06	-0.8859
MIMAT0003322	hsa-miR-652	9211	LGI1	uc009xui.2	AK309416	gugUUGGGAUCACCG-CGGUAa	||::|| ||||| |||||	ccaAAUUCU-GUGGCUGCCAUc	2	19	1826	1846	[hg19:10:95557565-95557585:+]	0.6951	132	0	-22.2	-0.3964
MIMAT0003322	hsa-miR-652	100288797	LOC100288797	uc002wgx.1	BC021178	gugUUGG-GAUCACCGC-GGUAa	|:|| ||: | ||| ||||	ccaAGCCACUGAUAGCGCCCAUa	2	19	273	295	[hg19:20:2797932-2797954:+]	0.5925	121	0	-15.56	-0.4437
MIMAT0003322	hsa-miR-652	51050	PI15	uc003yal.2	NM_015886	guguugGGAUCACCGCGGUAa	::|:| |||||||	auuucaUUUGGCAGCGCCAUa	2	16	3272	3292	[hg19:8:75764760-75764780:+]	0.5275	147	7	-15.92	-0.1729
MIMAT0003322	hsa-miR-652	65258	MPPE1	uc002kqf.2	NM_023075	guguugggaucaCCGCGGUAa	||||||||	------agagcaGGCGCCAUu	2	10	1	15	[hg19:18:11884429-11884443:-]	0.5744	145	7	-17.09	-0.5349
MIMAT0003322	hsa-miR-652	115286	SLC25A26	uc003dmt.2	CR606146	guguuGGGAUCACCG-CGGUAa	|:| | |||| |||||	cuuccCUCGAAUGGCAGCCAUc	2	17	38	59	[hg19:3:66428129-66428150:+]	0.7081	124	0	-19.7	-0.5489
MIMAT0003322	hsa-miR-652	145773	FAM81A	uc002agc.2	NM_152450	guguugggaucaccGCGGUAa	||||||	guuuuauuuucaauCGCCAUa	2	8	1178	1198	[hg19:15:59814755-59814775:+]	0.6079	120	6	-10.45	-0.1007
MIMAT0003322	hsa-miR-652	54780	NSMCE4A	uc001lfs.2	NM_017615	guguugggaucaccGCGGUAa	||||||	uaaaggaaacucacCGCCAUa	2	8	153	173	[hg19:10:123716614-123716634:-]	0.6302	120	6	-11.65	-0.1514
MIMAT0003322	hsa-miR-652	5244	ABCB4	uc003uiy.2	BC020618	guGUUGGGAUCACCG-CGGUAa	|:|:| | |||| |||||	auCGAUCAU-CUGGCAGCCAUg	2	20	115	135	[hg19:7:87082121-87082141:-]	0.5367	121	0	-18.75	-0.3816
MIMAT0003322	hsa-miR-652	728113	ANXA8L1	uc001jeh.2	NM_001098845	guguugggaucaccGCGGUAa	||||||	acgaaaaauucucuCGCCAUc	2	8	584	604	[hg19:10:47158233-47158253:-]	0.5376	120	6	-14.83	-0.1304
MIMAT0003322	hsa-miR-652	202781	LOC202781	uc010lqi.2	NR_028090	guguugggaucaccGCGGUAa	||||||	auuuuuuuuuaaaaCGCCAUc	2	8	1810	1830	[hg19:7:154796952-154796972:+]	0.5064	120	6	-11.2	-0.1014
MIMAT0003322	hsa-miR-652	79054	TRPM8	uc010fyk.2	BC033137	guGUUGGGAUCACC-GCGGUAa	||| |||: ||| ||||||	guCAA-CCUGCUGGUCGCCAUg	2	20	594	614	[hg19:2:234894484-234894504:+]	0.7992	133	6	-22.5	-0.1191
MIMAT0003322	hsa-miR-652	51652	VPS24	uc010ytl.1	AK294389	guGUUGGGAUC--ACCG-CGGUAa	||: | |:| |||| |||||	caCAGACAUGGUAUGGCAGCCAUu	2	20	520	543	[hg19:2:86732384-86732407:-]	0.5334	122	0	-21.78	-0.1994
MIMAT0003322	hsa-miR-652	5737	PTGFR	uc001din.2	NM_000959	guguugggaucacCGCGGUAa	|||||||	ucuccaaauuacaGCGCCAUa	2	9	3343	3363	[hg19:1:79005715-79005735:+]	0.4966	140	7	-13.57	-0.3855
MIMAT0003322	hsa-miR-652	2581	GALC	uc001xvt.2	NM_000153	guGUUGGGAUCACCG-CGGUAa	||| :|: |||| |||||	ccCAA--UUGUUGGCAGCCAUu	2	20	1450	1469	[hg19:14:88399607-88399626:-]	0.5569	120	0	-17.62	-0.329
MIMAT0003322	hsa-miR-652	59342	SCPEP1	uc010dcl.2	BC010078	gugUUGGGAU-CACCGCGGUAa	|:|: || | |||||||	ugaAGCUGUAGGAAGCGCCAUu	2	19	1485	1506	[hg19:17:55083658-55083679:+]	0.4676	149	7	-20.62	-0.2018
MIMAT0003322	hsa-miR-652	80298	MTERFD3	uc001tmg.1	NM_025198	gugUUGGGA-UCA--CCGCGGUAa	||::|| | | |:|||||	auaAAUUCUGACUCAUGUGCCAUa	2	19	141	164	[hg19:12:107371171-107371194:-]	0.5344	128	0	-14.09	-0.1316
MIMAT0003322	hsa-miR-652	89876	C3orf15	uc003edh.3	AB063297	guGUUGGGAUCACC-GCGGUAa	|:: :||: ||| ||||||	ugCGGGUCUGAUGGUCGCCAUc	2	20	1904	1925	[hg19:3:119485498-119485519:+]	0.5358	127	6	-23.37	-0.2046
MIMAT0003322	hsa-miR-652	55803	ADAP2	uc002hfx.2	NM_018404	guguugggaUC-ACCGCGGUAa	|| | |||||||	ggcgcagugAGAUUGCGCCAUu	2	13	483	504	[hg19:17:29285370-29285391:+]	0.5175	143	7	-19.77	-0.2187
MIMAT0003322	hsa-miR-652	7763	ZFAND5	uc004aiy.2	NM_001102421	gugUUGG-GAU-CACCGCGGUAa	|||| || |||||||||	ugaAACCAGUAUUUGGCGCCAUa	2	19	522	544	[hg19:9:74970325-74970347:-]	0.6102	156	7	-20.83	-0.2425
MIMAT0003322	hsa-miR-652	6938	TCF12	uc002aea.2	NM_207036	guGUUGGGAUCACCGCGGUAa	:|:| || |:|||||	ugUAGCAAUAAAUGUGCCAUc	2	20	2333	2353	[hg19:15:57580676-57580696:+]	0.8021	131	0	-13.68	-0.1047
MIMAT0003322	hsa-miR-652	80195	C10orf57	uc010qlv.1	AK309980	guGUUGGGAUCACCGCGGUaa	||| | :| ||||||	uaCAAAC--GGAAGCGCCAaa	3	20	101	119	[hg19:10:81850644-81850662:+]	0.7236	124	0	-14.79	-0.1305
MIMAT0003322	hsa-miR-652	515	ATP5F1	uc001ebd.3	CR598017	guGUUGGGAUCACCGCGGUAa	:::::| || |||||||	acUGGUUC-AGAAGCGCCAUu	2	20	534	553	[hg19:1:111999338-111999357:+]	0.7016	145	7	-18.85	-0.6762
MIMAT0003322	hsa-miR-652	515	ATP5F1	uc001ebd.3	CR598017	guGUUGGGAUCAC-CG-CGGUAa	|:| || ||| || |||||	cgCGAGACUUGUGAGCGGCCAUc	2	20	251	273	[hg19:1:111992067-111992089:+]	0.6499	122	0	-20.59	-0.2955
MIMAT0003322	hsa-miR-652	10207	INADL	uc001dac.2	AB044807	guguUGG-GAUCACCGCGGUAa	||| || |||||||	agauACCAAUAUAAGCGCCAUa	2	18	3726	3747	[hg19:1:62613964-62613985:+]	0.7279	144	7	-14.67	-0.4596
MIMAT0003322	hsa-miR-652	80270	HSD3B7	uc010cac.2	NM_001142778	guguugggaucacCGCGGUAa	|||||||	ccgacaaggcucaGCGCCAUu	2	9	250	270	[hg19:16:30999398-30999418:+]	0.6858	140	7	-17.07	-0.425
MIMAT0003322	hsa-miR-652	79834	SGK269	uc002bcn.2	AK074157	guGUUGGGAUCACCG-CGGUAa	| |:|||: ||| |||||	auCCAUCCUGCAGGCUGCCAUg	2	20	588	609	[hg19:15:77450204-77450225:-]	0.543	127	0	-19.16	-0.1094
MIMAT0003322	hsa-miR-652	1837	DTNA	uc010dmn.1	NM_001390	guGUUGGGAUCA----CCGCGGUAa	||||||| | |||||||	gcCAACCCUCCUCCACAGCGCCAUa	2	20	2850	2874	[hg19:18:32470548-32470572:+]	0.7209	150	7	-22.38	-0.5423
MIMAT0003322	hsa-miR-652	839	CASP6	uc003hzn.1	NM_001226	guGUUGGGAUC-ACCGCGGUAa	::| || || | |||||||	ggUGAGCCGAGAUUGCGCCAUu	2	20	278	299	[hg19:4:110610187-110610208:-]	0.5059	154	7	-18.34	-0.21
MIMAT0003322	hsa-miR-652	9525	VPS4B	uc002lix.2	NM_004869	guguugGGAUC-ACCGCGGUAa	|| || | |||||||	ugggcgCCGAGAUAGCGCCAUu	2	16	858	879	[hg19:18:61057329-61057350:-]	0.4999	150	7	-17.73	-0.1447
MIMAT0003322	hsa-miR-652	100132169	LOC100132169	uc002cfh.2	BC032901	gugUUGGGAUCA--CCGCGGUAa	:|:: ||| |||||||	uggGAUUACAGUCAUGCGCCAUc	2	19	543	565	[hg19:16:74612-74634:+]	0.968	141	7	-17.45	-1.0469
MIMAT0003322	hsa-miR-652	7690	ZNF131	uc010ivm.1	AK310735	guguugggaucaccGCGGUAa	||||||	guaaaauggccuuuCGCCAUu	2	8	277	297	[hg19:5:43139273-43139293:+]	0.7935	120	6	-15.86	-0.1309
MIMAT0003322	hsa-miR-652	9211	LGI1	uc001kjd.3	AF473548	gugUUGGGAUCACCG-CGGUAa	||::|| ||||| |||||	ccaAAUUCU-GUGGCUGCCAUc	2	19	22	42	[hg19:10:95557565-95557585:+]	0.6951	132	0	-22.2	-0.7821
MIMAT0003322	hsa-miR-652	100131814	C6orf217	uc010kgl.2	BC127000	guGUUGGGAUCACCGCGGUAa	|| :| || ||||||||	ucCACUCGGAGCGGCGCCAUc	2	20	188	208	[hg19:6:135819126-135819138,135819542-135819549:+]	0.5064	159	7	-22.62	-0.1048
MIMAT0003322	hsa-miR-652	5383	PMS2L5	uc003ubk.2	NR_027776	guGUUGGGAU-CAC-CGCGGUAa	| || ||| || |||||||	uuCUACGCUACCUGUGCGCCAUa	2	20	435	457	[hg19:7:74313903-74313925:+]	0.6736	153	7	-22.06	-1.1461
MIMAT0003322	hsa-miR-652	497634	BEYLA	uc010lxr.1	NR_027013	guguugggaucacCGCGGUAa	|||||||	guacuucacauaaGCGCCAUu	2	9	895	915	[hg19:8:47760837-47760857:+]	0.6769	140	7	-15.34	-0.7868
MIMAT0003322	hsa-miR-652	55054	ATG16L1	uc002vty.2	NM_030803	gugUUGGGAUCACCGCGGUAa	|| | || |||||||	cagAAGCACAGCAGCGCCAUc	2	19	895	915	[hg19:2:234203891-234203911:+]	0.4095	150	7	-18.81	-0.1019
MIMAT0003322	hsa-miR-652	5451	POU2F1	uc010plg.1	AK302525	guGUUGGGA-UCA---CCG-CGGUAa	||:||:| ||| ||| |||||	agCAGCCUUCAGUGCAGGCAGCCAUu	2	20	428	453	[hg19:1:167341206-167341231:+]	0.8158	125	0	-24.68	-0.3345
MIMAT0003322	hsa-miR-652	653145	ANXA8	uc010qfr.1	AK300139	guguugggaucaccGCGGUAa	||||||	acgaaaaauucucuCGCCAUc	2	8	584	604	[hg19:10:47158233-47158253:-]	0.5376	120	6	-14.83	-0.1304
MIMAT0003322	hsa-miR-652	2794	GNL1	uc011jga.1	NM_005275	guguugggaucacCGCGGUAa	|||||||	-guuccucgcccaGCGCCAUc	2	9	1	20	[hg19:6_ssto_hap7:1846106-1846125:-]	0.6854	140	7	-15.86	-0.6445
MIMAT0003322	hsa-miR-652	84856	LOC84856	uc001izy.2	NR_026827	guguuGGGAUCACCG-CGGUAa	||| ||| || |||||	ggaccCCCCAGUUGCAGCCAUg	2	17	813	834	[hg19:10:42987620-42987641:+]	0.5052	128	0	-17.97	-0.1023
MIMAT0003322	hsa-miR-652	2794	GNL1	uc003nqh.2	NM_005275	guguugggaucacCGCGGUAa	|||||||	-guuccucgcccaGCGCCAUc	2	9	1	20	[hg19:6:30513829-30513848:-]	0.6286	140	7	-15.86	-0.5267
MIMAT0003322	hsa-miR-652	29929	ALG6	uc009waj.2	CR618543	guguuGGGAUCACCG-CGGUAa	|:||: |||| |||||	ucguuCUCUGCUGGCUGCCAUu	2	17	938	959	[hg19:1:63877641-63877662:+]	0.7059	128	0	-22.88	-0.2083
MIMAT0003322	hsa-miR-652	439	ASNA1	uc002muv.2	NM_004317	guGUUGGGAUCACCG-CGGUAa	||:||| | || |||||	gcCAGCCCCAACCGCUGCCAUu	2	20	8	29	[hg19:19:12858926-12858947:+]	0.5091	123	0	-20.03	-0.3803
MIMAT0003322	hsa-miR-652	59342	SCPEP1	uc002iuv.3	NM_021626	gugUUGGGAU-CACCGCGGUAa	|:|: || | |||||||	ugaAGCUGUAGGAAGCGCCAUu	2	19	62	83	[hg19:17:55083658-55083679:+]	0.4676	149	7	-20.62	-0.4263
MIMAT0003322	hsa-miR-652	10613	ERLIN1	uc001kqo.3	NM_001100626	gugUUGGGAUCACCG-CGGUAa	|::||||| ||| |||||	ccaAGUCCUAG-GGCUGCCAUg	2	19	1014	1034	[hg19:10:101910854-101910874:-]	0.7028	132	0	-24.38	-0.1581
MIMAT0003322	hsa-miR-652	23046	KIF21B	uc001gvt.1	AK131318	guguuggGAUCAC--CGCGGUAa	||:||| |||||||	ggggagaCUGGUGAUGCGCCAUa	2	15	1061	1083	[hg19:1:200971586-200971608:-]	0.4721	153	7	-20.05	-0.1192
MIMAT0003322	hsa-miR-652	1019	CDK4	uc001spv.2	NM_000075	guGUUGGGAUCACCG-CGGUAa	||| : |||||| |||||	-gCAA-UGGAGUGGCUGCCAUg	2	20	1	20	[hg19:12:58142288-58142307:-]	0.6396	125	0	-21.57	-1.0655
MIMAT0003322	hsa-miR-652	7871	SLMAP	uc003djd.1	NM_007159	guguugggaucaccGCGGUAa	||||||	uuuuuacauauuuaCGCCAUu	2	8	471	491	[hg19:3:57913586-57913606:+]	0.6854	120	6	-13.84	-0.2861
MIMAT0003322	hsa-miR-652	987	LRBA	uc003ilx.1	BC064834	gugUUGG-GAUC-ACCGCGGUAa	|||: ||:| |||||||	uggAACUACUGGCAUGCGCCAUu	2	19	997	1019	[hg19:4:151934548-151934570:-]	0.5033	148	7	-19.99	-0.2093
MIMAT0003322	hsa-miR-652	152007	GLIPR2	uc003zza.2	CR749781	guGUUGGGAUCAC-CGCG-GUAa	||:::|| ||| |||| |||	uaCAGUUCU-GUGUGCGCUCAUu	2	20	1031	1052	[hg19:9:36162670-36162691:+]	0.6065	124	0	-24.96	-0.2728
MIMAT0003322	hsa-miR-652	8502	PKP4	uc002tzv.2	NM_003628	guguugggaucacCGCGGUAa	|||||||	ggcugguaccgcaGCGCCAUg	2	9	643	663	[hg19:2:159537832-159537852:+]	0.7433	140	7	-15.42	-0.3318
MIMAT0003322	hsa-miR-652	54936	ADPRHL2	uc001bzt.2	NM_017825	guGUUGGGAUCACCG-CGGUAa	:::|:|| |||| |||||	ccUGGCUCU--UGGCUGCCAUg	2	20	471	490	[hg19:1:36559458-36559477:+]	0.5792	120	0	-18.36	-0.1736
MIMAT0003322	hsa-miR-652	832	CAPZB	uc009vpk.2	AK125085	guGUUGGGAUCACCGCGGUAa	::||| | |||||||	auUGACCGCA-CAGCGCCAUc	2	20	159	178	[hg19:1:19665883-19665902:-]	0.5948	141	7	-14.97	-0.2594
MIMAT0003322	hsa-miR-652	3679	ITGA7	uc001shf.2	AF034833	guGUUGGGAUC-ACCG-CGGUAa	::|||:||| | || |||||	ucUGACCUUAGUUUGCUGCCAUc	2	20	584	606	[hg19:12:56078406-56078428:-]	0.655	130	0	-20.25	-0.7439
MIMAT0003322	hsa-miR-652	53349	ZFYVE1	uc001xnm.2	NM_021260	guGUUGGGAUCACCGCGG-UAa	|| :|||:|| ||||| ||	guCAUUCCUGGU-GCGCCUAUc	2	20	1279	1299	[hg19:14:73436291-73436311:-]	0.5538	129	0	-21.94	-0.127
MIMAT0003322	hsa-miR-652	153769	SH3RF2	uc003lnt.2	NM_152550	guGUUGG-GAUCACCG-CGGUAa	:::|| ||||| || |||||	acUGGCCACUAGUAGCUGCCAUa	2	20	457	479	[hg19:5:145442721-145442743:+]	0.5611	130	0	-20.93	-0.9434
MIMAT0003322	hsa-miR-652	10079	ATP9A	uc002xwg.1	NM_006045	guguugggaucacCGCGGUAa	|||||||	gaacuuacauaaaGCGCCAUu	2	9	2717	2737	[hg19:20:50215013-50215033:-]	0.5277	140	7	-15.09	-0.1397
MIMAT0003322	hsa-miR-652	2978	GUCA1A	uc011duo.1	AK125780	guGUUGGGAUCACCGCGGUAa	||: || | | |||||||	ucCAGGCC-AUUCGCGCCAUu	2	20	1363	1382	[hg19:6:42146163-42146167,42146540-42146554:+]	0.7357	153	7	-18.73	-0.3706
MIMAT0003322	hsa-miR-652	340706	VWA2	uc001lbk.1	NM_198496	guGUUGGGAUC-ACCGCGGUAa	::| || || | |||||||	ggUGAGCCAAGAUCGCGCCAUu	2	20	388	409	[hg19:10:116049692-116049713:+]	0.4966	154	7	-18.13	-0.1723
MIMAT0003322	hsa-miR-652	9902	MRC2	uc010ddq.1	AY429551	guGUUGG-GAUCACCGCGGUAa	:::|| ||:| |||||||	gcUGGCCACUGGCAGCGCCAUg	2	20	175	196	[hg19:17:60754655-60754676:+]	0.769	154	7	-21.98	-0.1309
MIMAT0003322	hsa-miR-652	29929	ALG6	uc001daz.2	CR602025	guguuGGGAUCACCG-CGGUAa	|:||: |||| |||||	ucguuCUCUGCUGGCUGCCAUu	2	17	938	959	[hg19:1:63877641-63877662:+]	0.7059	128	0	-22.88	-0.1985
MIMAT0003322	hsa-miR-652	64065	PERP	uc003qht.2	NM_022121	guguUGGGAUCACCGCG-GUAa	|||:|| ||||| |||	caauACCUUAACGGCGCACAUu	2	18	2147	2168	[hg19:6:138411011-138411032:-]	0.5848	129	0	-21.11	-0.1473
MIMAT0003322	hsa-miR-652	244	ANXA8L2	uc001jem.2	NM_001630	guguugggaucaccGCGGUAa	||||||	acgaaaaauucucuCGCCAUc	2	8	584	604	[hg19:10:47762771-47762791:+]	0.5369	120	6	-14.83	-0.1298
MIMAT0003322	hsa-miR-652	197322	ACSF3	uc002fmq.1	CR615543	guguuggGAUCACCGCGGUAa	| || ||||||||	ggaggaaCAAG-GGCGCCAUg	2	15	804	823	[hg19:16:89167664-89167683:+]	0.6939	148	7	-18.6	-0.1197
MIMAT0003322	hsa-miR-652	55041	PLEKHB2	uc010zap.1	AK293880	guGUUGGGAUCA-CCG-CGGUAa	||::|: | | ||| |||||	gcCAGUCUCAUUAGGCAGCCAUa	2	20	2349	2371	[hg19:2:131906672-131906694:+]	0.5447	122	0	-16.37	-0.1084
MIMAT0003322	hsa-miR-652	8828	NRP2	uc002vaw.2	NM_201266	guGUUGGGAUCACCG-CGGUAa	|||||||| || |||||	gcCAACCCUACAAGCUGCCAUu	2	20	574	595	[hg19:2:206660356-206660377:+]	0.6862	135	0	-24.07	-0.2383
MIMAT0003322	hsa-miR-652	283651	C15orf21	uc001zvk.2	BC062412	gugUUGGGAUCACCGCGGUAa	:||: || |||||||	uggGACUACAGGUGCGCCAUg	2	19	645	665	[hg19:15:45811568-45811588:+]	0.5054	150	7	-17.26	-0.1385
MIMAT0003322	hsa-miR-652	92106	OXNAD1	uc010her.1	AK307258	guguugggaucacCGCGGUAa	|||||||	gacuucuaagaaaGCGCCAUg	2	9	440	460	[hg19:3:16310773-16310782,16312452-16312462:+]	0.6396	140	7	-14.6	-0.3907
MIMAT0003322	hsa-miR-652	7422	VEGFA	uc003owh.2	NM_001025366	guguugggaucaccGCGGUAa	||||||	cuuggaauuggauuCGCCAUu	2	8	245	265	[hg19:6:43752544-43752564:+]	0.7763	120	6	-14.9	-0.124
MIMAT0003322	hsa-miR-652	157739	TDH	uc003wtq.1	NR_001578	guGUUGGGAUCACCGCGGUAa	| || |: |||||||	acCUACAAUGUCAGCGCCAUg	2	20	863	883	[hg19:8:11222384-11222404:+]	0.7869	143	7	-15.32	-0.7941
MIMAT0003322	hsa-miR-652	3779	KCNMB1	uc003maq.1	NM_004137	guguugggaucacCGCGGUAa	|:|||||	ucuaggauauaaaGUGCCAUa	2	9	476	496	[hg19:5:169805212-169805232:-]	0.511	124	0	-13.17	-0.117
MIMAT0003322	hsa-miR-652	10481	HOXB13	uc002ioa.2	NM_006361	guGUUGG-GAUCACCG-CGGUAa	:|||| || | || |||||	gaUAACCAGUACUAGCUGCCAUg	2	20	275	297	[hg19:17:46803855-46803877:-]	0.6441	122	0	-16.98	-0.5265
MIMAT0003322	hsa-miR-652	55315	SLC29A3	uc001jrr.3	NM_018344	guGUUG--GGAUCACCGCG-GUAa	|||| || || |||| |||	ugCAACCUCCCAGCUGCGCUCAUu	2	20	368	391	[hg19:10:73122733-73122756:+]	0.5496	122	0	-19.49	-0.1174
MIMAT0003322	hsa-miR-652	2794	GNL1	uc011fwu.1	NM_005275	guguugggaucacCGCGGUAa	|||||||	-guuccucgcccaGCGCCAUc	2	9	1	20	[hg19:6_dbb_hap3:1807460-1807479:-]	0.6854	140	7	-15.86	-0.6445
MIMAT0003322	hsa-miR-652	100133612	LOC100133612	uc010nzo.1	AK130173	guguugGGAUCACC-GCGGUAa	||| |||| ||||||	ggugcaCCU-GUGGCCGCCAUg	2	16	198	218	[hg19:1:3817165-3817185:+]	0.495	125	6	-21.62	-0.1433
MIMAT0003322	hsa-miR-652	3704	ITPA	uc002wid.2	NM_033453	gugUUGGGA----UCACC-GCGGUAa	|||:|| ||||| ||||||	agaAACUCUGGCAAGUGGACGCCAUu	2	19	169	194	[hg19:20:3204277-3204302:+]	0.5336	129	6	-24.88	-0.1029
MIMAT0003322	hsa-miR-652	55907	CMAS	uc001rfn.2	BC016609	guguugggaucaccGCGGUAa	||||||	ucucuguugugagaCGCCAUc	2	8	588	608	[hg19:12:22208494-22208514:+]	0.8094	120	6	-17.58	-0.1021
MIMAT0003322	hsa-miR-652	2794	GNL1	uc011elh.1	NM_005275	guguugggaucacCGCGGUAa	|||||||	-guuccucgcccaGCGCCAUc	2	9	1	20	[hg19:6_apd_hap1:1825472-1825491:-]	0.7418	140	7	-15.86	-0.7639
MIMAT0003322	hsa-miR-652	64744	SMAP2	uc001cfj.2	NM_022733	guguugggaucaccGCGGUAa	||||||	uaugguuuaaaaaaCGCCAUg	2	8	936	956	[hg19:1:40888709-40888729:+]	0.6468	120	6	-11	-0.1167
MIMAT0003322	hsa-miR-652	4771	NF2	uc003agh.3	NM_181829	gugUUGGGA-UCAC--CGCGGUAa	::|::| || | |||||||	cagGGCUUUCAGGGAAGCGCCAUc	2	19	3687	3710	[hg19:22:30094418-30094441:+]	0.5667	144	7	-18.37	-0.1788
MIMAT0003322	hsa-miR-652	3776	KCNK2	uc001hkr.3	NM_014217	guguugggaucacCGCGGUAa	|||||||	uauaugguggaauGCGCCAUg	2	9	1878	1898	[hg19:1:215410366-215410386:+]	0.7423	140	7	-16.34	-0.7194
MIMAT0003322	hsa-miR-652	127428	C1orf83	uc001cwu.1	AK096488	guguuGGGAU-CACCGCGGUAa	| ||| | |||||||	gcuguCACUAGGAAGCGCCAUa	2	17	913	934	[hg19:1:54562374-54562395:+]	0.6172	147	7	-19.02	-0.4753
MIMAT0003322	hsa-miR-652	152007	GLIPR2	uc003zyz.2	NM_022343	guGUUGGGAUCAC-CGCG-GUAa	||:::|| ||| |||| |||	uaCAGUUCU-GUGUGCGCUCAUu	2	20	151	172	[hg19:9:36162670-36162691:+]	0.6065	124	0	-24.96	-0.4405
MIMAT0003322	hsa-miR-652	53826	FXYD6	uc009yzq.1	AK311736	gugUUGGGAUCACCG-CGGUAa	|||: ||| || |||||	gagAACUGAAGU-GCAGCCAUc	2	19	495	515	[hg19:11:117710505-117710525:-]	0.7339	120	0	-15.31	-0.3282
MIMAT0003322	hsa-miR-652	4173	MCM4	uc003xql.1	NM_005914	guGUUGGGAUCACC-GCGGUAa	|| |:| : ||| ||||||	ugCAUCUCAGUUGGCCGCCAUc	2	20	64	85	[hg19:8:48889402-48889423:+]	0.3814	127	6	-19.78	-0.1435
MIMAT0003322	hsa-miR-652	114609	TIRAP	uc001qdn.1	NM_001039661	guGUUGGGAU-CACCGCGGUAa	| |:::|: ||||||||	aaCUAUUUUGCCAGGCGCCAUg	2	20	1119	1140	[hg19:11:126164701-126164722:+]	0.5093	146	7	-18.89	-0.1561
MIMAT0003322	hsa-miR-652	440078	FAM66C	uc001qug.3	AK096301	guGUUGGGAUC-ACCGCGGUAa	::| :| || | |||||||	agUGAGUCGAGAUUGCGCCAUu	2	20	2106	2127	[hg19:12:8368686-8368707:+]	0.6423	150	7	-15.57	-0.2074
MIMAT0003322	hsa-miR-652	340152	ZC3H12D	uc010kid.2	BC157832	guGUUGGGAUCACCG-CGGUAa	| |||| |||| |||||	ccCCACCCCCUUGGCAGCCAUg	2	20	408	429	[hg19:6:149771390-149771411:-]	0.4972	127	0	-22.15	-0.2949
MIMAT0003322	hsa-miR-652	3679	ITGA7	uc001shh.2	NM_001144996	guGUUGGGAUC-ACCG-CGGUAa	::|||:||| | || |||||	ucUGACCUUAGUUUGCUGCCAUc	2	20	414	436	[hg19:12:56078406-56078428:-]	0.655	130	0	-20.25	-0.7815
MIMAT0003322	hsa-miR-652	84203	TXNDC2	uc010wzq.1	AK303045	guguugggaUCACCGCGGUAa	||| |||||||	uggugagagAGU-GCGCCAUc	2	13	1378	1397	[hg19:18:9888014-9888033:+]	0.6587	146	7	-14.83	-0.2757
MIMAT0003322	hsa-miR-652	51268	PIPOX	uc002hdr.1	NM_016518	guGUUGGGAUC-ACCGCGGUAa	::| || || | |||||||	agUGAGCCGAGAUUGCGCCAUu	2	20	619	640	[hg19:17:27383942-27383963:+]	0.5093	154	7	-18.34	-0.1647
MIMAT0003322	hsa-miR-652	92747	C20orf114	uc002wyw.1	NM_033197	gugUUGGGAUC-ACCG-CGGUAa	|: |:|:| |||| |||||	---AGACUUGGAUGGCAGCCAUc	2	19	1	20	[hg19:20:31897574-31897593:+]	0.6013	125	0	-19.69	-0.1026
MIMAT0003322	hsa-miR-652	2794	GNL1	uc011eyh.1	NM_005275	guguugggaucacCGCGGUAa	|||||||	-guuccucgcccaGCGCCAUc	2	9	1	20	[hg19:6_cox_hap2:2025877-2025896:-]	0.6854	140	7	-15.86	-0.6445
MIMAT0003322	hsa-miR-652	22895	RPH3A	uc001ttz.2	NM_001143854	guGUUG--GGAUCACCG-CGGUAa	|||| |:| |||| |||||	gcCAACAGCUUCCUGGCUGCCAUc	2	20	1771	1794	[hg19:12:113336356-113336379:+]	0.5516	126	0	-20.17	-0.246
MIMAT0003322	hsa-miR-652	10120	ACTR1B	uc002syb.2	NM_005735	guguugggaUCAC-CGCGGUAa	| || |||||||	cgugugggaAUUGAGCGCCAUg	2	13	219	240	[hg19:2:98273081-98273102:-]	0.5529	143	7	-12.85	-0.1716
MIMAT0003322	hsa-miR-652	285043	LOC285043	uc002rng.2	AK123934	guGUUGGGAUCACCG-CGGUAa	|||:| || ||| |||||	ucCAAUC--AGAGGCUGCCAUg	2	20	1278	1297	[hg19:2:30575061-30575080:+]	0.5811	124	0	-17.53	-0.2398
MIMAT0003322	hsa-miR-652	27020	NPTN	uc002avs.2	NM_012428	gugUUGGGAUCACCGCGGUAa	:|:| |: |||||||	ucaGAUCAUGCAUGCGCCAUu	2	19	291	311	[hg19:15:73853093-73853113:-]	0.6874	146	7	-16.18	-1.1794
MIMAT0003322	hsa-miR-652	2869	GRK5	uc001led.2	NM_005308	guguUGGGAUCACCGCGGUAa	|:::|| | |||:|||	acguAUUUUAAUAGCGUCAUa	2	18	271	291	[hg19:10:121214850-121214870:+]	0.7897	141	0	-13.57	-0.2244
MIMAT0003322	hsa-miR-652	55612	FERMT1	uc002wmr.2	NM_017671	guGUUGGGAUCACCG-CGGUAa	::| || ||| || |||||	ucUGAGCC-AGUAGCUGCCAUc	2	20	1572	1592	[hg19:20:6056228-6056248:-]	0.5408	121	0	-14.84	-0.1249
MIMAT0003322	hsa-miR-652	1108	CHD4	uc001qpo.2	NM_001273	guGUUGGGAUC---ACCGCGGUAa	||:| ||| |||||||||	ugCAGCAGUAGCGCUGGCGCCAUc	2	20	195	218	[hg19:12:6679624-6679647:-]	0.6327	158	7	-24.87	-0.1396
MIMAT0003322	hsa-miR-652	5380	PMS2L2	uc003txi.3	AB017007	guGUUGGGAU-CAC-CGCGGUAa	| || ||| || |||||||	uuCUACGCUACCUGUGCGCCAUa	2	20	732	754	[hg19:7:72511821-72511843:+]	0.6343	153	7	-22.06	-1.1313
MIMAT0003322	hsa-miR-652	54879	ST7L	uc010owi.1	AK301869	guguugggAUCACCG-CGGUAa	|||| || |||||	uuuguauaUAGUUGCUGCCAUa	2	14	84	105	[hg19:1:113084429-113084450:-]	0.6125	121	0	-12.39	-1.2645
MIMAT0003322	hsa-miR-652	144455	E2F7	uc001sym.3	NM_203394	guguuggGAUCACCGCGGUAa	|| || |||||||	uauuuagCU-GUAGCGCCAUc	2	15	865	884	[hg19:12:77416911-77416930:-]	0.6491	148	7	-15.74	-0.5893
MIMAT0003322	hsa-miR-652	113540	CMTM1	uc010cdt.1	BC028676	guGUUGGGAUCACCGCGGUAa	:|: : || |||||||	caUAGGUAUAUACGCGCCAUg	2	20	38	58	[hg19:16:66601123-66601143:+]	0.5107	143	7	-15.26	-0.1289
MIMAT0003322	hsa-miR-652	389170	LEKR1	uc003fba.1	NM_001004316	guGUUGGGAUCACCGCGGUaa	||| :| | ||||||	uuCAA--UUUCUUGCGCCAcu	3	20	317	335	[hg19:3:156763856-156763874:+]	0.5741	124	0	-13.62	-0.1076
MIMAT0003322	hsa-miR-652	10587	TXNRD2	uc011ahc.1	NM_006440	guguugggaucacCGCGGUAa	|||||||	-------------GCGCCAUc	2	9	1	8	[hg19:22:19864620-19864627:-]	0.677	140	7	-11.19	-0.1145
MIMAT0003322	hsa-miR-652	53335	BCL11A	uc010ypi.1	AK300012	guGUUGGGAUCACCGCGGUAa	:|: ||| | |||||||	ccUAGGCCU-GCAGCGCCAUu	2	20	149	168	[hg19:2:60679542-60679561:-]	0.772	149	7	-20.73	-0.8491
MIMAT0003322	hsa-miR-652	1153	CIRBP	uc002lru.2	CR625198	guGUUGGGAUCACC-GCGGUAa	|:||:| ||||| ||||||	ccCGACUC-AGUGGCCGCCAUg	2	20	132	152	[hg19:19:1269398-1269409,1270927-1270935:+]	0.6362	137	6	-26.63	-0.135
MIMAT0003322	hsa-miR-652	5590	PRKCZ	uc010nyx.1	AK302160	guGUUGGGAUCACCGCGGUAa	::||| | | ||||||	aaUGACCAAAUUUACGCCAUg	2	20	423	443	[hg19:1:2082361-2082381:+]	0.8074	123	6	-13.64	-0.123
MIMAT0003322	hsa-miR-652	2794	GNL1	uc011iiw.1	NM_005275	guguugggaucacCGCGGUAa	|||||||	-guuccucgcccaGCGCCAUc	2	9	1	20	[hg19:6_qbl_hap6:1806732-1806751:-]	0.6854	140	7	-15.86	-0.9074
MIMAT0003322	hsa-miR-652	5383	PMS2L5	uc010lbw.2	AK309660	guGUUGGGAU-CAC-CGCGGUAa	| || ||| || |||||||	uuCUACGCUACCUGUGCGCCAUa	2	20	430	452	[hg19:7:74313903-74313925:+]	0.6736	153	7	-22.06	-1.129
MIMAT0003322	hsa-miR-652	11112	HIBADH	uc003szi.2	AK025558	guGUU-GGGAUCACCGCGGUAa	||: :|| | ||||||||	gaCAGUUCCCA--GGCGCCAUu	2	20	488	507	[hg19:7:27580844-27580863:-]	0.5059	147	7	-23.6	-0.3206
MIMAT0003322	hsa-miR-652	100131814	C6orf217	uc003qgm.2	AJ606326	guGUUGGGAUCACCGCGGUAa	|| :| || ||||||||	ucCACUCGGAGCGGCGCCAUc	2	20	188	208	[hg19:6:135819126-135819138,135819542-135819549:+]	0.5064	159	7	-22.62	-0.102
MIMAT0003322	hsa-miR-652	2562	GABRB3	uc001zaz.2	NM_000814	guGUUGGGA-UCACCGCGGUAa	| :| :| | ||||||||	uaCUGCAUUGAAAGGCGCCAUg	2	20	3843	3864	[hg19:15:26789076-26789097:-]	0.7251	146	7	-17.59	-0.2821
MIMAT0003322	hsa-miR-652	6453	ITSN1	uc002yta.1	NM_003024	guguuGGGAUCACCG-CGGUAa	|:| : |||| |||||	uggguCUCGGUUGGCAGCCAUg	2	17	817	838	[hg19:21:35261421-35261442:+]	0.5282	120	0	-18.18	-0.2307
MIMAT0003322	hsa-miR-652	64096	GFRA4	uc002win.2	NM_022139	guGUUGG-GAUCACCGCGGUAa	:|:|| | || |||||||	ugUAGCCACCUGU-GCGCCAUg	2	20	484	504	[hg19:20:3640052-3640072:-]	0.5166	148	7	-19.83	-0.2555
MIMAT0003322	hsa-miR-652	84315	MON1A	uc010hlb.2	AK307140	guguuggGAUCACCGCGGUAa	|| | ||||||||	ucacaggCU-GCGGCGCCAUu	2	15	323	342	[hg19:3:49950102-49950121:-]	0.518	148	7	-25.67	-0.1366
MIMAT0003322	hsa-miR-652	2775	GNAO1	uc002eit.3	NM_138736	guguUGGGAUCACCG-CGGUAa	| ::|| |||| |||||	uaauAAUUUAUUGGCUGCCAUa	2	18	4180	4201	[hg19:16:56382042-56382063:+]	0.6567	125	0	-16.21	-0.6908
MIMAT0003322	hsa-miR-652	2781	GNAZ	uc002zwu.1	NM_002073	gugUUGGGAUCACCGCGGUAa	||: | | |||||||	guaAAUACGAACUGCGCCAUg	2	19	1392	1412	[hg19:22:23467010-23467030:+]	0.4463	146	7	-15.66	-0.1017
MIMAT0003322	hsa-miR-652	100316868	NCRNA00213	uc003szc.1	AK093987	guGUUGG---GAUCACCG-CGGUAa	|:||| || || || |||||	agCGACCCGUCUUGUAGCUGCCAUg	2	20	850	874	[hg19:7:27241006-27241030:+]	0.5434	122	0	-21.02	-0.2417
MIMAT0003322	hsa-miR-652	57338	JPH3	uc010vou.1	AK295518	guguuggGAUCACCGCGGUAa	| | ||||||||	gggccagCAACCGGCGCCAUg	2	15	658	678	[hg19:16:87678425-87678445:+]	0.8563	146	7	-21.26	-0.1053
MIMAT0003322	hsa-miR-652	58525	WIZ	uc002nbb.3	NM_021241	guGUUGGGAUCACCGCGGUAa	| ::|| || |||||||	cuCUGUCC-AG-AGCGCCAUg	2	20	1068	1086	[hg19:19:15532801-15532819:-]	0.5721	143	7	-16.24	-0.1396
MIMAT0003322	hsa-miR-652	27327	TNRC6A	uc002dmm.2	NM_014494	guguuGGGAUCACCGCGGUAa	||| | | |||||||	acacuCCCAAAUAGCGCCAUa	2	17	206	226	[hg19:16:24835334-24835354:+]	0.635	156	7	-20.9	-1.0758
MIMAT0003322	hsa-miR-652	80124	VCPIP1	uc003xwn.2	NM_025054	guGUUGGGAUCACCGCGGUAa	:||: || | |||||||	uaUAAUAAUAAUAGCGCCAUa	2	20	3448	3468	[hg19:8:67543268-67543288:-]	0.5674	155	7	-14.95	-0.9233
MIMAT0003322	hsa-miR-652	5324	PLAG1	uc010lyi.2	NM_001114634	guguugggaUCACCGCGGUAa	| | |||||||	gaaauggggAAUAGCGCCAUa	2	13	2507	2527	[hg19:8:57076275-57076295:-]	0.5259	144	7	-12.06	-0.1872
MIMAT0003322	hsa-miR-652	26065	LSM14A	uc002nvb.3	NM_001114093	guGUUGGGAUCACCG-CGGUAa	||:: || |||| |||||	ucCAGUACU--UGGCAGCCAUa	2	20	1577	1596	[hg19:19:34719813-34719832:+]	0.7227	120	0	-15.66	-0.8345
MIMAT0003322	hsa-miR-652	284371	ZNF841	uc010ydh.1	NM_001136499	gugUUGGGAUCA-CCGCGGUAa	||| || |||||||	gugAACAGACGUCAGCGCCAUg	2	19	569	590	[hg19:19:52567770-52567791:-]	0.5084	141	7	-14.94	-0.4558
MIMAT0003322	hsa-miR-652	202051	SPATA24	uc003lem.2	BC050563	guguugggaucaccGCGGUAa	||||||	acuauauucuucacCGCCAUa	2	8	17	37	[hg19:5:138737225-138737245:-]	0.7185	120	6	-12.73	-0.2363
MIMAT0003322	hsa-miR-652	55176	SEC61A2	uc001ilf.3	NR_024577	gugUUGGGAUCACCGCGGUAa	|::|| | ||||||||	cugAGUCC-AUGGGCGCCAUc	2	19	1323	1342	[hg19:10:12202996-12203015:+]	0.782	152	7	-20.68	-0.4707
MIMAT0003322	hsa-miR-652	1647	GADD45A	uc009wbd.1	EF614238	gugUUGGGAUCAC-CG-CGGUAa	|:::: |||| || |||||	uaaAGUUUAAGUGUGCAGCCAUa	2	19	773	795	[hg19:1:68153777-68153799:+]	0.5998	121	0	-16.45	-1.0657
MIMAT0003322	hsa-miR-652	117177	RAB3IP	uc001svl.1	BC059358	guGUUGGGAUCACCGCGGUAa	||:|: : | |||||||	guCAGCUGAGAUUGCGCCAUc	2	20	838	858	[hg19:12:70190022-70190042:+]	0.5037	151	7	-17.69	-0.1764
MIMAT0003322	hsa-miR-652	8502	PKP4	uc002uad.2	CR602334	guguugggaucacCGCGGUAa	|||||||	ggcugguaccgcaGCGCCAUg	2	9	1649	1669	[hg19:2:159537832-159537852:+]	0.7433	140	7	-15.42	-0.1944
MIMAT0003322	hsa-miR-652	94241	TP53INP1	uc003yhg.2	NM_033285	guguugggAUCACCGCGGUAa	|||| |||||||	agcuuuuaUAGU-GCGCCAUg	2	14	2743	2762	[hg19:8:95939945-95939964:-]	0.6031	151	7	-16.54	-0.2018
MIMAT0003322	hsa-miR-652	144455	E2F7	uc009zse.2	BC016658	guguuggGAUCACCGCGGUAa	|| || |||||||	uauuuagCU-GUAGCGCCAUc	2	15	989	1008	[hg19:12:77416911-77416930:-]	0.6491	148	7	-15.74	-0.559
MIMAT0003322	hsa-miR-652	23026	MYO16	uc010tjh.1	AK302933	guguugGGAUCACCGC-GGUAa	||| | |||| ||||	-cuucgCCUUGGGGCGCCCAUg	2	16	1	21	[hg19:13:109779952-109779972:+]	0.5052	123	0	-21.83	-0.2161
MIMAT0003322	hsa-miR-652	441263	PMS2L11	uc003ufw.3	NR_023383	guGUUGGGAU-CAC-CGCGGUAa	| || ||| || |||||||	uuCUACGCUACCUGUGCGCCAUa	2	20	1458	1480	[hg19:7:76645124-76645146:+]	0.6095	153	7	-22.06	-0.9786
MIMAT0003322	hsa-miR-652	9612	NCOR2	uc010tay.1	NM_006312	guguUGGGAUCACC-GCGGUAa	|::|| |||| ||||||	gcguAUUCU-GUGGCCGCCAUc	2	18	901	921	[hg19:12:124809027-124809047:-]	0.5936	127	6	-22.92	-0.164
MIMAT0003322	hsa-miR-652	145389	SLC38A6	uc001xfj.1	AF070578	guguugggaucaccGCGGUAa	||||||	cauucucauggauuCGCCAUu	2	8	1604	1624	[hg19:14:61518545-61518565:+]	0.7891	120	6	-16.85	-0.1133
MIMAT0003322	hsa-miR-652	2886	GRB7	uc002hst.2	AB008790	guGUUGGGAUCACCGCGGUAa	| :: || | |||||||	ugCCGUGCUUGCUGCGCCAUu	2	20	124	144	[hg19:17:37903107-37903127:+]	0.7036	147	7	-16.68	-0.2264
MIMAT0003322	hsa-miR-652	400509	RUNDC2B	uc010vdo.1	NM_001012391	guguugggaucaccGCGGUAa	||||||	uagagaaaggguuuCGCCAUg	2	8	244	264	[hg19:16:29382343-29382363:+]	0.9662	120	6	-11.91	-0.2343
MIMAT0003322	hsa-miR-652	79691	QTRTD1	uc003eba.2	AL832215	guGUUGGGAUC-ACCGCGGUAa	::| :| || | |||||||	agUGAGUCGAGUUUGCGCCAUu	2	20	2521	2542	[hg19:3:113798326-113798347:+]	0.5043	150	7	-16.98	-0.102
MIMAT0003322	hsa-miR-652	9616	RNF7	uc003eue.2	AF312226	guguugggAU-CACCGCGGUAa	|| || |||||||	gagugcgaUACGU-GCGCCAUc	2	14	269	289	[hg19:3:141457319-141457339:+]	0.7829	142	7	-15.49	-0.1788
MIMAT0003322	hsa-miR-652	317716	BASE	uc002wyp.2	NR_026760	guGUUGGGAUCACCGCGGUAa	||:|:: |||||||	ucCAGCUUCCACAGCGCCAUg	2	20	1021	1041	[hg19:20:31798086-31798106:+]	0.6058	143	7	-16.58	-0.2284
MIMAT0003322	hsa-miR-652	51747	LUC7L3	uc010wmw.1	AK295983	guguugggaucaccGCGGUAa	||||||	auuuguaauauaguCGCCAUu	2	8	187	207	[hg19:17:48828291-48828311:+]	0.6369	120	6	-14.77	-0.1811
MIMAT0003322	hsa-miR-652	9459	ARHGEF6	uc004fab.2	NM_004840	guGUUGGGAUCA-CCGCGGUAa	|| || | | |||||||	caCAUCCAAAUUCAGCGCCAUu	2	20	1303	1324	[hg19:X:135748864-135748885:-]	0.56	146	7	-19.55	-0.2998
MIMAT0003322	hsa-miR-652	152007	GLIPR2	uc010mlf.1	AK307243	guGUUGGGAUCAC-CGCG-GUAa	||:::|| ||| |||| |||	uaCAGUUCU-GUGUGCGCUCAUu	2	20	431	452	[hg19:9:36162670-36162691:+]	0.6065	124	0	-24.96	-0.6217
MIMAT0003322	hsa-miR-652	26503	SLC17A5	uc003phn.3	NM_012434	guGUUGGGAUCAC--CG-CGGUAa	|| |:|| ||| || |||||	agCAUCUCU-GUGGAGCUGCCAUc	2	20	432	454	[hg19:6:74304346-74304368:-]	0.561	120	0	-20.29	-0.224
MIMAT0003322	hsa-miR-652	1647	GADD45A	uc009wbc.1	EF581092	gugUUGGGAUCAC-CG-CGGUAa	|:::: |||| || |||||	uaaAGUUUAAGUGUGCAGCCAUa	2	19	875	897	[hg19:1:68153777-68153799:+]	0.5998	121	0	-16.45	-1.0497
MIMAT0003322	hsa-miR-652	55074	OXR1	uc003ymf.2	NM_018002	guGUUGGGAUCAC---CGC-GGUAa	:||| |||| | ||| ||||	guUAACACUAGGGACUGCGUCCAUg	2	20	191	215	[hg19:8:107763360-107763384:+]	0.6099	122	0	-15.27	-0.3987
MIMAT0003322	hsa-miR-652	915	CD3D	uc001pss.1	NM_000732	guguuGGGAUCACCG-CGGUAa	::|||| || |||||	guggcUUCUAGAAGCAGCCAUu	2	17	12	33	[hg19:11:118209844-118209865:-]	0.6327	120	0	-16.84	-0.4127
MIMAT0003322	hsa-miR-652	23527	ACAP2	uc003fuo.2	AK222635	gugUUGGGAUCACCGCGGUAa	|:|| | | |||||||	gugAGCCGAAAUCGCGCCAUu	2	19	944	964	[hg19:3:195056685-195056705:-]	0.5073	154	7	-16.51	-0.1098
MIMAT0003322	hsa-miR-652	4771	NF2	uc003age.3	NM_000268	gugUUGGGA-UCAC--CGCGGUAa	::|::| || | |||||||	cagGGCUUUCAGGGAAGCGCCAUc	2	19	3627	3650	[hg19:22:30094418-30094441:+]	0.5667	144	7	-18.37	-0.185
MIMAT0003322	hsa-miR-652	100131814	C6orf217	uc010kgo.2	EU130902	guguugggaucacCGCGGUAa	|||||||	-------------GCGCCAUc	2	9	1	8	[hg19:6:135819542-135819549:+]	0.5736	140	7	-11.19	-0.3374
MIMAT0003322	hsa-miR-652	5891	RAGE	uc001ylm.2	NM_014226	guGUUGGGAUCACCGCGGUAa	||::| |:| |||||||	guCAGUCGUGG-AGCGCCAUc	2	20	369	388	[hg19:14:102695238-102695257:-]	0.4769	153	7	-20.54	-0.1328
MIMAT0003322	hsa-miR-652	90933	TRIM41	uc003mnf.1	BC071887	gugUUGGGAUC--ACC-GCGGUAa	|: :||:| ||| ||||||	gagAGAUCUGGAAUGGUCGCCAUg	2	19	2229	2252	[hg19:5:180662380-180662403:+]	0.6483	121	6	-18.35	-0.292
MIMAT0003322	hsa-miR-652	7871	SLMAP	uc011bfc.1	AK302934	guguugggaucaccGCGGUAa	||||||	uuuuuacauauuuaCGCCAUu	2	8	570	590	[hg19:3:57913586-57913606:+]	0.6854	120	6	-13.84	-0.27
MIMAT0003322	hsa-miR-652	6585	SLIT1	uc001kmw.2	NM_003061	gugUUGGGAUCACCGCGGUAa	|| | | | |||||||	uuaAAAGCAAAUUGCGCCAUa	2	19	156	176	[hg19:10:98760693-98760713:-]	0.4685	150	7	-11.8	-0.1998
MIMAT0003322	hsa-miR-652	832	CAPZB	uc001bce.2	NM_004930	guGUUGGGAUCACCGCGGUAa	::||| | |||||||	auUGACCGCA-CAGCGCCAUc	2	20	122	141	[hg19:1:19665883-19665902:-]	0.5948	141	7	-14.97	-0.2651
MIMAT0003322	hsa-miR-652	5931	RBBP7	uc004cxt.2	NM_002893	guguugggaucacCGCGGUaa	||||||	cuugauuuaucaaGCGCCAaa	3	9	49	69	[hg19:X:16863089-16863109:-]	0.6777	120	0	-11.13	-0.1363
MIMAT0003322	hsa-miR-652	10026	PIGK	uc001dhl.1	BC026186	guGUUGGGAUCACCGCGGUAa	| |:|| | |||||||	ggCUAUCCCA---GCGCCAUa	2	20	276	293	[hg19:1:77619828-77619845:-]	0.55	143	7	-15.31	-0.8741
MIMAT0003322	hsa-miR-652	9973	CCS	uc001ois.2	CR592698	guguugggaucacCGCGGUAa	|||||||	gaugcugacggccGCGCCAUc	2	9	331	351	[hg19:11:66372840-66372860:+]	0.7022	140	7	-17.64	-0.1715
MIMAT0003322	hsa-miR-652	126549	ANKLE1	uc002nga.2	NM_152363	guGUUGGGAUCACCGCGGUAa	|| :|| | |||||||	uaCACUCCCACCAGCGCCAUg	2	20	554	574	[hg19:19:17397915-17397935:+]	0.5082	151	7	-20.55	-0.3015
MIMAT0003322	hsa-miR-652	1520	CTSS	uc001evn.2	NM_004079	guguuGGGAUCACCG-CGGUAa	||| || || |||||	guucuCCCCAGAAGCAGCCAUa	2	17	2495	2516	[hg19:1:150703006-150703027:-]	0.5201	120	0	-15.89	-0.1654
MIMAT0003322	hsa-miR-652	347689	SOX2OT	uc003fkv.2	BC041898	guGUUGGGAUCACCGCGGUAa	| || | | ||||||||	agCCACAC-AUAGGCGCCAUu	2	20	1703	1722	[hg19:3:181458388-181458407:+]	0.5807	149	7	-19.39	-0.3311
MIMAT0003322	hsa-miR-652	401463	LOC401463	uc003xvh.2	AK097150	gugUUGGGAUCACCGCGGUAa	||||| | |||||||	uaaAACCC-A-CAGCGCCAUc	2	19	986	1004	[hg19:8:65487796-65487814:-]	0.7225	146	7	-18.58	-0.5433
MIMAT0003322	hsa-miR-652	10395	DLC1	uc003wwm.2	NM_182643	guguugGGAUCACCGCGGUAa	|:||| |||||||	aggucaCUUAG-AGCGCCAUc	2	16	2285	2304	[hg19:8:12941016-12941035:-]	0.6002	149	7	-17.89	-0.3005
MIMAT0003322	hsa-miR-652	200008	CDCP2	uc001cwv.1	NM_201546	guGUUGG-GAUC-ACCG-CGGUAa	||:|: | || |||| |||||	caCAGCUGCAAGAUGGCUGCCAUa	2	20	305	328	[hg19:1:54604865-54604888:-]	0.5414	125	0	-23.02	-0.2048
MIMAT0003322	hsa-miR-652	5380	PMS2L2	uc010las.1	NR_003614	guGUUGGGAU-CAC-CGCGGUAa	| || ||| || |||||||	uuCUACGCUACCUGUGCGCCAUa	2	20	666	688	[hg19:7:72511821-72511843:+]	0.6343	153	7	-22.06	-1.1561
MIMAT0003322	hsa-miR-652	79585	CORO7	uc002cwi.1	AK097238	guGUUG-GGAUC-A-CCGCGGUAa	|| | |:||| | |||||||	acCACCUCUUAGAUCUGCGCCAUa	2	20	622	645	[hg19:16:4407672-4407695:-]	0.5088	148	7	-20	-0.8232
MIMAT0003322	hsa-miR-652	23759	PPIL2	uc002zvh.3	NM_148176	gugUUGGGAUCACCGCGGUAa	||| | |||||||	aagAACAAGAACUGCGCCAUg	2	19	59	79	[hg19:22:22051251-22051271:+]	0.4802	142	7	-13.84	-0.231
MIMAT0003322	hsa-miR-652	347689	SOX2OT	uc003fkw.3	NR_004053	guGUUGGGAUCACCGCGGUAa	| || | | ||||||||	agCCACAC-AUAGGCGCCAUu	2	20	1878	1897	[hg19:3:181458388-181458407:+]	0.5807	149	7	-19.39	-0.3032
MIMAT0003322	hsa-miR-652	140767	NRSN1	uc003ndv.2	BC067291	guguugggaucacCGCGGUAa	|||||||	gggauugaagaauGCGCCAUu	2	9	154	174	[hg19:6:24126567-24126568,24128356-24128374:+]	0.6819	140	7	-13.88	-1.1101
MIMAT0003322	hsa-miR-652	53335	BCL11A	uc002sac.2	NM_138559	guGUUGGGAUCACCGCGGUAa	:|: ||| | |||||||	ccUAGGCCU-GCAGCGCCAUu	2	20	139	158	[hg19:2:60679542-60679561:-]	0.772	149	7	-20.73	-0.8514
MIMAT0003322	hsa-miR-652	90933	TRIM41	uc003mne.1	NM_033549	gugUUGGGAUC--ACC-GCGGUAa	|: :||:| ||| ||||||	gagAGAUCUGGAAUGGUCGCCAUg	2	19	605	628	[hg19:5:180662380-180662403:+]	0.6483	121	6	-18.35	-0.5659
MIMAT0003322	hsa-miR-652	9760	TOX	uc003xtw.1	NM_014729	gugUUGGGAUCACCGCGG-UAa	:| ||| || ||||| ||	augGAACCU-GUUGCGCCUAUu	2	19	910	930	[hg19:8:59719376-59719396:-]	0.8127	120	0	-16.08	-1.172
MIMAT0003322	hsa-miR-652	164	AP1G1	uc010cgg.2	NM_001128	guGUUGGGAUCACCGCGGUAa	||| : | ||||||||	uuCAAGUAUUCAGGCGCCAUg	2	20	1479	1499	[hg19:16:71765462-71765482:-]	0.6275	151	7	-17.18	-0.1166
MIMAT0003322	hsa-miR-652	196463	PLBD2	uc001tve.2	NM_173542	guGUUGGGAUC--A-CCGCGGUAa	||: ::|:| | |||||||	cuCAGGUUUGGGUUCUGCGCCAUc	2	20	828	851	[hg19:12:113827259-113827282:+]	0.5057	141	7	-19.59	-0.1068
MIMAT0003322	hsa-miR-652	23759	PPIL2	uc002zvk.3	U37220	gugUUGGGAUCACCGCGGUAa	||| | |||||||	aagAACAAGAACUGCGCCAUg	2	19	84	104	[hg19:22:22051251-22051271:+]	0.4802	142	7	-13.84	-0.2272
MIMAT0003322	hsa-miR-652	55298	RNF121	uc009yst.2	AL833638	guGUUGGGAUCACCG-CGGUAa	||| :|: |||| |||||	ggCAA--UUGUUGGCAGCCAUg	2	20	898	917	[hg19:11:71708113-71708132:+]	0.5578	120	0	-16.64	-0.108
MIMAT0003322	hsa-miR-652	114792	KLHL32	uc003ppa.2	BC047491	gugUUGGGAUCACCGCGGUAa	:|:||| || |||||||	ccgGAUCCUUGU-GCGCCAUa	2	19	833	852	[hg19:6:97578746-97578765:+]	0.7801	160	7	-21.22	-1.0128
MIMAT0003322	hsa-miR-652	9659	PDE4DIP	uc001eme.1	AK001619	guGUUGGGAUCACCG-CGGUAa	||||||| || |||||	agCAACCCUUAAAGCUGCCAUa	2	20	21	42	[hg19:1:144895207-144895228:-]	0.5788	127	0	-22.06	-0.98
MIMAT0003322	hsa-miR-652	54536	EXOC6	uc001kif.3	AF220217	guGUUGGGAUCACCG-CGGUAa	||: :||:| || |||||	cuCAGAUCUGGAAGCAGCCAUu	2	20	1989	2010	[hg19:10:94661394-94661415:+]	0.5207	123	0	-19.22	-0.1349
MIMAT0003322	hsa-miR-652	93556	C3orf50	uc003ffh.3	BC105690	guGUUGGGAUC-ACCGCGGUAa	::| |: || | |||||||	agUGAGCUGAGAUUGCGCCAUu	2	20	1300	1321	[hg19:3:168548332-168548353:+]	0.4994	150	7	-15.8	-0.2124
MIMAT0003322	hsa-miR-652	10966	RAB40B	uc002kft.2	NM_006822	guGUUGGGAUCACCGCGGUaa	|||: : | ||||||	uuCAAUGUCA-AAGCGCCAau	3	20	435	454	[hg19:17:80615285-80615304:-]	0.5223	121	0	-11.97	-0.1174
MIMAT0003322	hsa-miR-652	28976	ACAD9	uc003eld.1	CR613592	guguuGGGAUCACCG-CGGUAa	|| | | ||| |||||	cugcuCCAUCGAGGCAGCCAUg	2	17	489	510	[hg19:3:128623321-128623342:+]	0.8187	120	0	-13.98	-0.3496
MIMAT0003322	hsa-miR-652	57710	KIAA1614	uc001gok.2	NM_020950	guGUUGGGAUC-ACCGCGGUAa	::| || || | |||||||	agUGAGCCGAGAUUGCGCCAUu	2	20	456	477	[hg19:1:180915180-180915201:+]	0.511	154	7	-18.34	-0.2725
MIMAT0003322	hsa-miR-652	93974	ATPIF1	uc001bpr.2	NM_178191	guguugggaUCAC-CGCGGUAa	| || |||||||	cagaaagaaAUUGAGCGCCAUa	2	13	1466	1487	[hg19:1:28564433-28564454:+]	0.7282	143	7	-13.53	-1.1433
MIMAT0003322	hsa-miR-652	84909	C9orf3	uc004auy.2	NM_032823	gugUUGGGAUCA-CCGCGGUAa	|: || ||| ||||||||	augAGACC-AGUGGGCGCCAUu	2	19	399	419	[hg19:9:97849358-97849378:+]	0.4788	155	7	-23.07	-0.4662
MIMAT0003322	hsa-miR-652	338579	LOC338579	uc009xmr.1	BC031237	gugUUGGGA--UCAC-CGCGGUAa	||:: | | || |||||||	uggAAUUAUUGAAUGAGCGCCAUa	2	19	647	670	[hg19:10:45666916-45666939:+]	0.5285	144	7	-13.07	-1.1132
MIMAT0003322	hsa-miR-652	10482	NXF1	uc010rmh.1	AK304082	guGUUGGGAUCACCGCGGUAa	|: :|:|: |||||||	ccCGUUCUUGACAGCGCCAUu	2	20	1733	1753	[hg19:11:62566041-62566061:-]	0.7219	147	7	-18.47	-0.5807
MIMAT0003322	hsa-miR-652	100288797	LOC100288797	uc002wgy.1	AK126033	gugUUGG-GAUCACCGC-GGUAa	|:|| ||: | ||| ||||	ccaAGCCACUGAUAGCGCCCAUa	2	19	273	295	[hg19:20:2797932-2797954:+]	0.5925	121	0	-15.56	-0.138
MIMAT0003322	hsa-miR-652	51340	CRNKL1	uc002wrs.2	NM_016652	guGUUGGGAUCA--CCGCG-GUAa	:||::: ||| ||||| |||	aaUAAUUUCAGUUAGGCGCUCAUc	2	20	714	737	[hg19:20:20016102-20016125:-]	0.514	122	0	-17.39	-0.2853
MIMAT0003322	hsa-miR-652	158435	LOC158435	uc004avz.2	BC008050	guGUUGGGAUCACCGCGGUAa	|| :|| | |||||||	uaCACUCCCAUCAGCGCCAUg	2	20	1568	1588	[hg19:9:98863972-98863992:+]	0.5188	151	7	-20.55	-0.2705
MIMAT0003322	hsa-miR-652	79832	QSER1	uc001mua.2	AK025577	guguugggaucaccGCGGUAa	||||||	ugcuugcuuuacauCGCCAUa	2	8	34	54	[hg19:11:32997136-32997156:+]	0.5478	120	6	-11.96	-0.1053
MIMAT0003322	hsa-miR-652	2778	GNAS	uc002xzt.2	NM_016592	gugUUGGGAUCACC-GCGGUAa	|||| | |||| ||||||	ugaAACCAUUGUGGCCGCCAUg	2	19	212	233	[hg19:20:57478637-57478640,57478727-57478744:+]	0.7215	138	6	-22.34	-0.1915
MIMAT0003322	hsa-miR-652	7366	UGT2B15	uc011cal.1	NM_001076	guguugggaucacCGCGGUAa	|||||||	uugaguuugucauGCGCCAUa	2	9	1943	1963	[hg19:4:69403522-69403542:-]	0.6329	140	7	-12.91	-0.8046
MIMAT0003322	hsa-miR-652	3767	KCNJ11	uc001mna.2	NM_000525	guguuGGGAUCACCGCGGUAa	::| || ||||||||	cccccUUCAAGAGGCGCCAUa	2	17	1138	1158	[hg19:11:17407308-17407328:-]	0.5659	156	7	-22.47	-0.2114
MIMAT0003322	hsa-miR-652	9044	BTAF1	uc001khr.2	NM_003972	gugUUGGGAUCACCGCGGUAa	|:||:|| | | |||||	aaaAGCCUUAAU-GAGCCAUa	2	19	421	440	[hg19:10:93789111-93789130:+]	0.6368	128	0	-15.13	-0.1235
MIMAT0003322	hsa-miR-652	11151	CORO1A	uc010vej.1	AK296207	gugUUGGGAUCACCG-CGGUAa	::| ||:| ||| |||||	gugGGCACUGG-GGCGGCCAUg	2	19	73	93	[hg19:16:30198389-30198409:+]	0.6688	120	0	-18.27	-0.1007
MIMAT0003322	hsa-miR-652	9472	AKAP6	uc001wrq.2	NM_004274	guGUUGG-GAUCACCGCGGUAa	||||: :|| |||||||	agCAACUAUUAAAAGCGCCAUu	2	20	556	577	[hg19:14:33299567-33299588:+]	0.722	154	7	-18.79	-1.2426
MIMAT0003322	hsa-miR-652	9122	SLC16A4	uc001dzo.1	NM_004696	gugUUGGGA-UCACCGCGGUAa	|||:|| | | ||||||	ccaAACUCUCAAUUACGCCAUg	2	19	588	609	[hg19:1:110905779-110905800:-]	0.5659	129	6	-14.84	-0.1062
MIMAT0003322	hsa-miR-652	342926	ZNF677	uc002qbg.1	NM_182609	guguugggaucacCGCGGUAa	|||||||	ggauuacaggcauGCGCCAUc	2	9	885	905	[hg19:19:53739320-53739340:-]	0.5089	140	7	-16.18	-0.188
MIMAT0003322	hsa-miR-652	7533	YWHAH	uc003alz.2	NM_003405	guguUGGGAUCACCGCGGUAa	|:|||: |||||||	guguAUCCUGACAGCGCCAUg	2	18	686	706	[hg19:22:32353465-32353485:+]	0.7773	153	7	-19.49	-0.8596
MIMAT0003322	hsa-miR-652	442578	STAG3L3	uc011kfx.1	BC066937	guguUGGGAUCACCGCGGUAa	:|::|:|| |||||||	ucuuGCUUUGGUUGCGCCAUg	2	18	100	120	[hg19:7:74988646-74988666:+]	0.5	161	7	-20.6	-0.1205
MIMAT0003322	hsa-miR-652	440574	C1orf151	uc001bch.1	BC009927	guguugggaucacCGCGGUAa	|||||||	ggauuacaggcauGCGCCAUc	2	9	2201	2221	[hg19:1:19954707-19954727:+]	0.5069	140	7	-16.18	-0.1193
MIMAT0003322	hsa-miR-652	5170	PDPK1	uc010uwe.1	AK293900	guguuGGGAUCACCGCGGUAa	|||||| |||||||	ugcucCCCUAG-AGCGCCAUc	2	17	548	567	[hg19:16:2612166-2612185:+]	0.5067	158	7	-24.32	-0.4249
MIMAT0003322	hsa-miR-652	5170	PDPK1	uc010uwe.1	AK293900	gugUUGGGAUCAC--CGCGGUAa	||::||:| | ||| |||	uaaAAUUCUGGAGAAGCGACAUa	2	19	155	177	[hg19:16:2611773-2611795:+]	0.7493	125	0	-13.02	-0.1128
MIMAT0003322	hsa-miR-652	4836	NMT1	uc002iia.2	CR626529	guguugggaUCACCGCGGUAa	| | |||||||	guuggguucAUUAGCGCCAUc	2	13	685	705	[hg19:17:43174566-43174586:+]	0.785	144	7	-14.01	-0.2428
MIMAT0003322	hsa-miR-652	285848	PNPLA1	uc010jwf.2	NM_001145717	guguugGGAUC-ACCGCGGUAa	|| || |||||||	agugcaCCAAGACUGCGCCAUu	2	16	602	623	[hg19:6:36276095-36276116:+]	0.5047	142	7	-17.36	-0.2956
MIMAT0003322	hsa-miR-652	26301	GBGT1	uc010nab.2	AK307687	gugUUGGGAUCACCG-CGGUAa	|: |||:||||| |||||	gggAGACCUGGUGGCUGCCAUu	2	19	214	235	[hg19:9:136029327-136029348:-]	0.7017	138	0	-27.59	-0.129
MIMAT0003322	hsa-miR-652	126549	ANKLE1	uc010xpm.1	AK303628	guGUUGGGAUCACCGCGGUAa	|| :|| | |||||||	uaCACUCCCACCAGCGCCAUg	2	20	2422	2442	[hg19:19:17397915-17397935:+]	0.5082	151	7	-20.55	-0.105
MIMAT0003322	hsa-miR-652	89876	C3orf15	uc003edg.3	AB063298	guGUUGGGAUCACC-GCGGUAa	|:: :||: ||| ||||||	ugCGGGUCUGAUGGUCGCCAUc	2	20	1920	1941	[hg19:3:119485498-119485519:+]	0.5358	127	6	-23.37	-0.2027
MIMAT0003322	hsa-miR-652	2794	GNL1	uc011hlr.1	NM_005275	guguugggaucacCGCGGUAa	|||||||	-guuccucgcccaGCGCCAUc	2	9	1	20	[hg19:6_mcf_hap5:1895683-1895702:-]	0.6854	140	7	-15.86	-0.6445
MIMAT0003322	hsa-miR-652	55074	OXR1	uc010mcg.2	AK123667	guGUUGGGAUCAC---CGC-GGUAa	:||| |||| | ||| ||||	guUAACACUAGGGACUGCGUCCAUg	2	20	1154	1178	[hg19:8:107763360-107763384:+]	0.6099	122	0	-15.27	-0.2309
MIMAT0003322	hsa-miR-652	440574	C1orf151	uc001bci.1	NM_001032363	guguugggaucacCGCGGUAa	|||||||	ggauuacaggcauGCGCCAUc	2	9	1812	1832	[hg19:1:19954707-19954727:+]	0.5069	140	7	-16.18	-0.1178
MIMAT0003322	hsa-miR-652	84865	CCDC142	uc002slq.2	NM_032779	guguugggaucACCGCGGUAa	| |||||||	caaagagguuuUUGCGCCAUu	2	11	1596	1616	[hg19:2:74700057-74700077:-]	0.5079	142	7	-14.78	-0.6813
MIMAT0003322	hsa-miR-652	9128	PRPF4	uc004bgx.2	NM_004697	guGUUGGGAUC-ACCGCGGUAa	::| || || | |||||||	agUGAGCCGAGAUUGCGCCAUu	2	20	495	516	[hg19:9:116054435-116054456:+]	0.5096	154	7	-18.34	-0.2092
MIMAT0003322	hsa-miR-652	83892	KCTD10	uc001toi.1	NM_031954	guguugGGAUCACCGCGGUAa	:|| | |||||||	uuucugUCUCUUUGCGCCAUa	2	16	2838	2858	[hg19:12:109886542-109886562:-]	0.5461	147	7	-15.51	-0.8092
MIMAT0003322	hsa-miR-652	728113	ANXA8L1	uc001jev.2	NM_001098845	guguugggaucaccGCGGUAa	||||||	acgaaaaauucucuCGCCAUc	2	8	584	604	[hg19:10:48271099-48271119:+]	0.5238	120	6	-14.83	-0.1206
MIMAT0003322	hsa-miR-652	84456	L3MBTL3	uc003qbt.2	NM_032438	guguugggaucACCGCGGUAa	| |:|||||	uauuguuaauuUUGUGCCAUa	2	11	474	494	[hg19:6:130461372-130461392:+]	0.6974	126	0	-10.95	-0.1185
MIMAT0003322	hsa-miR-652	3141	HLCS	uc002yvs.2	NM_000411	guGUUGGGAUCA-CCGCGGUAa	||| : || | |||||||	gaCAAAUGUAUUCAGCGCCAUa	2	20	3238	3259	[hg19:21:38123288-38123309:-]	0.5285	150	7	-13.8	-0.6623
MIMAT0003322	hsa-miR-652	7436	VLDLR	uc003zhm.1	AB208822	guGUUGGGAUCACCGC-GGUAa	|||||: |||||| ||||	gcCAACCU--GUGGCGCCCAUg	2	20	967	986	[hg19:9:2643281-2643300:+]	0.7983	132	0	-24.23	-0.1257
MIMAT0003322	hsa-miR-652	7436	VLDLR	uc003zhm.1	AB208822	gugUUGG--GAUCACCGC-GGUAa	||:| || |||||| ||||	ugaAAUCAGCU-GUGGCGCCCAUu	2	19	745	767	[hg19:9:2641399-2641421:+]	0.8028	123	0	-21.09	-0.2718
MIMAT0003322	hsa-miR-652	58489	FAM108C1	uc002bfu.2	NM_021214	guGUUGGGA---UCACCGCGGUaa	::|| || ||| ||||||	uuUGACACUGGAAGUUGCGCCAaa	3	20	997	1020	[hg19:15:81047708-81047731:+]	0.697	134	0	-16.05	-0.1142
MIMAT0003322	hsa-miR-652	6203	RPS9	uc002qec.2	BC096822	guGUUGGGAUCACCGCGGUAa	::|:|| : |||||||	gcUGAUCC-GCCAGCGCCAUa	2	20	409	428	[hg19:19:54710307-54710326:+]	0.7438	141	7	-17.36	-0.6819
MIMAT0003322	hsa-miR-652	55658	RNF126	uc010drs.2	NM_194460	gugUUGGGAUCACCG-CGGUAa	|:|:| ||||| |||||	uugAGCUCACGUGGCGGCCAUg	2	19	310	331	[hg19:19:647797-647818:-]	0.6016	130	0	-20.79	-0.1809
MIMAT0003322	hsa-miR-652	572	BAD	uc001nzd.2	NM_032989	guGUUGGGAUCACCG-CGGUAa	| :||||: ||| |||||	caCUGCCCUG--GGCAGCCAUc	2	20	35	54	[hg19:11:64037627-64037646:-]	0.552	120	0	-23.61	-0.1735
MIMAT0003322	hsa-miR-652	6720	SREBF1	uc002grt.1	NM_001005291	guGUUGGGA-UC--ACCG-CGGUAa	::||||| || ||| |||||	cuUGACCCUAAGACCGGCGGCCAUg	2	20	171	195	[hg19:17:17715741-17715765:-]	0.4953	121	0	-21.02	-0.1025
MIMAT0003322	hsa-miR-652	8450	CUL4B	uc004esw.2	NM_003588	gugUUGGGAUCAC-CG-CGGUAa	| :|:|| || || |||||	guaAUUCUUAUUGAGCAGCCAUu	2	19	1645	1667	[hg19:X:119658949-119658971:-]	0.5867	121	0	-17.39	-0.2905
MIMAT0003322	hsa-miR-652	727832	GOLGA6L6	uc001ytk.2	NM_001145004	gugUUG-GGAUCACCG-CGGUAa	|:| |||:| || |||||	--gAGCACCUGGAAGCUGCCAUc	2	19	1	21	[hg19:15:20738820-20738840:-]	0.5784	121	0	-18.99	-0.1479
MIMAT0003322	hsa-miR-652	26073	POLDIP2	uc002haz.2	NM_015584	guGUUGGGAUC--ACCGCGGUAa	| :||| :| |||||||	ucCUGCCCAGGACCUGCGCCAUc	2	20	1205	1227	[hg19:17:26673916-26673938:-]	0.5942	142	7	-18.56	-0.2591
MIMAT0003322	hsa-miR-652	356	FASLG	uc001gis.2	NM_000639	gugUUGGGAUCACCG-CGGUAa	|||:||: ||| |||||	uagAACUCUG--GGCUGCCAUg	2	19	213	232	[hg19:1:172635369-172635388:+]	0.6333	123	0	-20.13	-0.368
MIMAT0003322	hsa-miR-652	280	AMY2B	uc001dus.1	DQ786288	gugUUGGGAUCACCGCGGUaa	||| : : ||||||||	gugAACAUCGAUGGCGCCAaa	3	19	195	215	[hg19:1:104120206-104120226:+]	0.6759	138	0	-17.37	-0.1246
MIMAT0003322	hsa-miR-652	32	ACACB	uc010sxl.1	AK302469	guguugggaucacCGCGGUAa	|||||||	agguucuucauccGCGCCAUc	2	9	567	587	[hg19:12:109675138-109675158:+]	0.7808	140	7	-15.87	-0.1596
MIMAT0003322	hsa-miR-652	10548	TM9SF1	uc001wnb.1	NM_006405	guGUUGGGAUCACCG-CGGUAa	|::|:| ||| || |||||	ggCGGCUC-AGUUGCUGCCAUg	2	20	610	630	[hg19:14:24657991-24658011:-]	0.6454	125	0	-20.2	-0.1292
MIMAT0003322	hsa-miR-652	10051	SMC4	uc003fdf.1	AK002200	guguugggaucaCCGCGGUAa	||||||||	----------uaGGCGCCAUu	2	10	1	11	[hg19:3:160117430-160117440:+]	0.6501	145	7	-17.09	-0.3909
MIMAT0003322	hsa-miR-652	89876	C3orf15	uc003ede.3	NM_033364	guGUUGGGAUCACC-GCGGUAa	|:: :||: ||| ||||||	ugCGGGUCUGAUGGUCGCCAUc	2	20	1601	1622	[hg19:3:119485498-119485519:+]	0.5358	127	6	-23.37	-0.2415
MIMAT0003322	hsa-miR-652	55176	SEC61A2	uc001ilh.3	NR_024576	gugUUGGGAUCACCGCGGUAa	|::|| | ||||||||	cugAGUCC-AUGGGCGCCAUc	2	19	1190	1209	[hg19:10:12202996-12203015:+]	0.782	152	7	-20.68	-0.498
MIMAT0003322	hsa-miR-652	4705	NDUFA10	uc002vyn.2	NM_004544	guguUGGGAUCACC-GCGGUAa	||:|| ||| ||||||	ccgcACUCUCCUGGACGCCAUa	2	18	53	74	[hg19:2:240900461-240900482:-]	0.4408	129	6	-23.21	-0.2597
MIMAT0003322	hsa-miR-652	284861	LOC284861	uc002zuk.3	BC039313	guguugggaucacCGCGGUAa	|||||||	uccugaggaaaaaGCGCCAUc	2	9	1936	1956	[hg19:22:21540456-21540476:+]	0.6421	140	7	-16.84	-0.4836
MIMAT0003322	hsa-miR-652	6303	SAT1	uc010nfv.2	AK315888	guGUU-GGGAUCACCGCGGUAa	||: |:|||| ||||||	uaCAGUCUCUAGCUUCGCCAUg	2	20	252	273	[hg19:X:23802413-23802434:+]	0.8381	130	6	-22.04	-0.137
MIMAT0003322	hsa-miR-652	221336	BEND6	uc003pdg.2	BC036119	gugUUGGGAUCACCGCGGUaa	|| | || ||||||	aggAAGAAUUGU-GCGCCAaa	3	19	786	805	[hg19:6:56857255-56857274:+]	0.795	124	0	-11.89	-0.1871
MIMAT0003322	hsa-miR-652	10040	TOM1L1	uc010dcb.1	AK309164	guguugggaucaccGCGGUAa	||||||	gugcgagugaugucCGCCAUa	2	8	274	294	[hg19:17:52993149-52993169:+]	0.8196	120	6	-12.25	-0.3446
MIMAT0003322	hsa-miR-652	55334	SLC39A9	uc001xle.2	NM_018375	guGUUGGGA--UCACCG-CGGUAa	|||: || ||| || |||||	ggCAAUACUUAAGUUGCUGCCAUg	2	20	2510	2533	[hg19:14:69927820-69927843:+]	0.6448	126	0	-16.48	-0.3375
MIMAT0003322	hsa-miR-652	25976	TIPARP	uc003fav.2	NM_015508	guGUUGGGAUCAC---CG-CGGUAa	:||:|||: || || |||||	guUAAUCCUGUUGUUUGCUGCCAUu	2	20	1393	1417	[hg19:3:156424313-156424337:+]	0.7374	122	0	-19.26	-0.4434
MIMAT0003322	hsa-miR-652	200058	FLJ23867	uc001god.3	NR_026900	guguugGGAUC---ACCGCGGUAa	||||| | |||||||	uaguuaCCUAGAAUUAGCGCCAUg	2	16	533	556	[hg19:1:180168130-180168153:+]	0.4916	150	7	-19.17	-0.3828
MIMAT0003322	hsa-miR-652	9260	PDLIM7	uc003mhf.2	BC084575	guguugggaUCACCGCGGUAa	|| ||||||||	uugaggagaAG-GGCGCCAUc	2	13	36	55	[hg19:5:176915138-176915157:-]	0.7232	146	7	-17.18	-0.2527
MIMAT0003322	hsa-miR-652	22913	RALY	uc002xad.2	CR620280	guguUGGGAUCAC-CGCGGUAa	||:| | || |||||||	caguACUCCAAUGAGCGCCAUg	2	18	479	500	[hg19:20:32660061-32660082:+]	0.8063	156	7	-17.23	-0.2994
MIMAT0003322	hsa-miR-652	1837	DTNA	uc010dmj.2	AK308410	guGUUGGGAUCA----CCGCGGUAa	||||||| | |||||||	gcCAACCCUCCUCCACAGCGCCAUa	2	20	144	168	[hg19:18:32470548-32470572:+]	0.7209	150	7	-22.38	-1.2846
MIMAT0003322	hsa-miR-652	9211	LGI1	uc001kjc.3	NM_005097	gugUUGGGAUCACCG-CGGUAa	||::|| ||||| |||||	ccaAAUUCU-GUGGCUGCCAUc	2	19	5	25	[hg19:10:95557565-95557585:+]	0.6951	132	0	-22.2	-1.0688
MIMAT0003322	hsa-miR-652	55219	TMEM57	uc009vrt.2	AK311472	guguugggaucACCGCGGUaa	| ||||||	ccucgaagucaUAGCGCCAca	3	11	1279	1299	[hg19:1:25785226-25785246:+]	0.8043	122	0	-12.7	-0.1611
MIMAT0003322	hsa-miR-652	7422	VEGFA	uc003owi.2	NM_001033756	guguugggaucaccGCGGUAa	||||||	cuuggaauuggauuCGCCAUu	2	8	179	199	[hg19:6:43752544-43752564:+]	0.7763	120	6	-14.9	-0.1296
MIMAT0003322	hsa-miR-652	6487	ST3GAL3	uc009vwx.2	AF425865	guGUUGGGAUCACCGCGGUAa	:| ||| || ||||||||	ccUACCCCGAG-GGCGCCAUg	2	20	826	845	[hg19:1:44365278-44365297:+]	0.8033	161	7	-24.85	-0.1046
MIMAT0003322	hsa-miR-652	87178	PNPT1	uc002rzf.2	NM_033109	guGUUGGGAUC-ACCGCGGUAa	::| || || | |||||||	agUGAGCCGAGAUUGCGCCAUu	2	20	846	867	[hg19:2:55862505-55862526:-]	0.5063	154	7	-18.34	-0.1385
MIMAT0003322	hsa-miR-652	87178	PNPT1	uc002rzf.2	NM_033109	guGUUGGGAUC-ACCGCGGUAa	::| || || | |||||||	agUGAGCCGAGAUUGCGCCAUu	2	20	1899	1920	[hg19:2:55861452-55861473:-]	0.5072	154	7	-18.34	-0.1441
MIMAT0003322	hsa-miR-652	8793	TNFRSF10D	uc003xcz.1	NM_003840	guguugggaucacCGCGGUAa	|||||||	gcuucucuuucaaGCGCCAUu	2	9	1249	1269	[hg19:8:22994114-22994134:-]	0.5476	140	7	-17.41	-0.3983
MIMAT0003322	hsa-miR-652	554223	LOC554223	uc011ejf.1	BC068238	gugUUGGGA---UC---ACCG-CGGUAa	|||||| || |||| |||||	ugaAACCCUCUGAGGAAUGGCUGCCAUc	2	19	833	860	[hg19:6_apd_hap1:1064821-1064848:+]	0.6083	120	0	-21.19	-0.1251
MIMAT0003322	hsa-miR-652	633	BGN	uc004fhq.1	CR624916	guguugGGAUCACCGCGGUAa	|||| |||||||	cacccaCCUA-CAGCGCCAUg	2	16	339	358	[hg19:X:152770256-152770275:+]	0.6495	145	7	-19.3	-0.3498
MIMAT0003322	hsa-miR-652	124751	KRBA2	uc002glf.1	NM_213597	guGUUGGGAUCACCG-CGGUAa	:| :|:||| ||| |||||	uuUAUUCUUAG-GGCUGCCAUa	2	20	161	181	[hg19:17:8272271-8272291:-]	0.5697	125	0	-19.17	-0.972
MIMAT0003322	hsa-miR-652	6334	SCN8A	uc001rza.1	AJ310885	guguUGGGAUCA-CCGCGGUAa	:||:|:|| ||||||||	gaauGCCUUGGUGGGCGCCAUc	2	18	253	274	[hg19:12:52180334-52180355:+]	0.8862	164	7	-26.81	-0.2699
MIMAT0003322	hsa-miR-652	79666	PLEKHF2	uc003yhn.1	NM_024613	guguUGGGAUCACCG-CGGUAa	||::| | ||| |||||	cuuuACUUUUGAGGCAGCCAUu	2	18	1282	1303	[hg19:8:96168304-96168325:+]	0.6201	125	0	-16.84	-0.3007
MIMAT0003322	hsa-miR-652	23269	MGA	uc001zoi.2	BX648098	gugUUGGGAUCACCGCGGUAa	|:||| : | |||||||	gugAGCCCAGAUCGCGCCAUu	2	19	1027	1047	[hg19:15:42043864-42043884:+]	0.5053	158	7	-21.84	-0.1046
MIMAT0003322	hsa-miR-652	90639	COX19	uc003sjp.1	NM_001031617	gugUUGGG-AUCACCGCGGUAa	| ||| | | |||||||	ggaAUCCCAAAAUAGCGCCAUu	2	19	4266	4287	[hg19:7:1004727-1004748:-]	0.5494	149	7	-17.45	-0.1016
MIMAT0003322	hsa-miR-652	356	FASLG	uc001git.2	AF288573	gugUUGGGAUCACCG-CGGUAa	|||:||: ||| |||||	uagAACUCUG--GGCUGCCAUg	2	19	629	648	[hg19:1:172635369-172635388:+]	0.6333	123	0	-20.13	-0.2922
MIMAT0003322	hsa-miR-652	166863	RBM46	uc003iop.1	AK125877	guguuggGAUCACCG-CGGUAa	||| |||| |||||	ucacuugCUAAUGGCAGCCAUg	2	15	1224	1245	[hg19:4:155749154-155749175:+]	0.8508	126	0	-20.04	-0.5657
MIMAT0003322	hsa-miR-652	728568	C12orf73	uc009zuj.2	NM_001135570	guguugggaucacCGCGGUAa	|||||||	uggucauggaaauGCGCCAUc	2	9	888	908	[hg19:12:104344393-104344413:-]	0.518	140	7	-14.15	-0.3819
MIMAT0003322	hsa-miR-652	23081	KDM4C	uc011lmj.1	AK303651	gugUUGG-GA---UC-ACCGCGGUAa	|||| || || |||||||||	caaAACCUCUAAGAGUUGGCGCCAUc	2	19	2160	2185	[hg19:9:6990433-6990458:+]	0.6893	155	7	-23.53	-0.2144
MIMAT0003322	hsa-miR-652	9578	CDC42BPB	uc001ymi.1	NM_006035	guGUUGGGAUCACCG-CGGUAa	|| :|: :|| || |||||	uuCAUUCUGGGUCGCAGCCAUg	2	20	607	628	[hg19:14:103399421-103399442:-]	0.4758	123	0	-16.03	-0.1493
MIMAT0003322	hsa-miR-652	10482	NXF1	uc001nvg.1	NM_001081491	guGUUGGGAUCACCGCGGUAa	|: :|:|: |||||||	ccCGUUCUUGACAGCGCCAUu	2	20	1733	1753	[hg19:11:62566041-62566061:-]	0.7219	147	7	-18.47	-0.3216
MIMAT0003322	hsa-miR-652	3145	HMBS	uc009zao.1	AK309544	guGUUGGGAUCACCGCGGUAa	| |: || | |||||||	ucCCAUGCU--UUGCGCCAUu	2	20	145	163	[hg19:11:118963048-118963066:+]	0.4789	144	7	-17.55	-0.3884
MIMAT0003322	hsa-miR-652	64127	NOD2	uc010cbo.1	AY187237	guguUGGGAU-CACCGCGGUAa	|||: | | |||||||	cuguACCUGAGGAAGCGCCAUc	2	18	714	735	[hg19:16:50745182-50745203:+]	0.6481	148	7	-18.89	-0.2328
MIMAT0003322	hsa-miR-652	2053	EPHX2	uc010lut.1	AK294065	guguuGGGAUCACCGCGGUAa	|| | ||||||||	ccucuCCAUCCAGGCGCCAUg	2	17	277	297	[hg19:8:27396599-27396619:+]	0.5136	148	7	-18.42	-0.1854
MIMAT0003322	hsa-miR-652	148206	ZNF714	uc002npl.2	BC064985	guGUUGGGAUC-ACCGCGGUAa	::| || || | |||||||	agUGAGCCAAGAUCGCGCCAUu	2	20	61	82	[hg19:19:21301196-21301217:+]	0.5085	154	7	-18.13	-0.3266
MIMAT0003322	hsa-miR-652	29099	COMMD9	uc001mwn.3	NM_014186	guGUUGGGA---UCACCGCGGUAa	:||::|| | | |||||||	uaUAAUUCUGUGACUAGCGCCAUu	2	20	1841	1864	[hg19:11:36294318-36294341:-]	0.567	150	7	-23.29	-0.5723
MIMAT0003322	hsa-miR-652	221468	TMEM217	uc003onm.3	NM_001162900	guGUUGGGAUC---ACCG-CGGUAa	| | |||:| |||| |||||	gaCCAGCCUGGCCUUGGCAGCCAUg	2	20	28	52	[hg19:6:37186146-37186170:-]	0.5028	122	0	-21.68	-0.1059
MIMAT0003322	hsa-miR-652	4258	MGST2	uc010ioi.1	AK307231	gugUUGGGAUCACCGCGGUAa	|| :| || |||||||	ucaAAGUCAAGAAGCGCCAUu	2	19	193	213	[hg19:4:140587114-140587134:+]	0.5661	154	7	-18.14	-0.8555
MIMAT0003322	hsa-miR-652	100128398	LOC100128398	uc002qqz.1	AK094748	guGUUGGGAUC-ACCGCGGUAa	::| || || | |||||||	auUGAGCCGAGAUUGCGCCAUu	2	20	830	851	[hg19:19:58518197-58518218:+]	0.5038	154	7	-18.34	-0.1414
MIMAT0003322	hsa-miR-652	285331	CCDC66	uc003dhw.2	AK095688	guGUUGGGAUC-ACCGCGGUAa	::| |: || | |||||||	agUGAGCUGAGAUAGCGCCAUu	2	20	1327	1348	[hg19:3:56604717-56604738:+]	0.5051	150	7	-15.88	-0.1233
MIMAT0003322	hsa-miR-652	85461	TANC1	uc002uai.1	AK000401	gugUUGGGA-UCAC-CG-CGGUAa	||:| | |||| || |||||	ggaAAUCAUAAGUGCGCUGCCAUu	2	19	167	190	[hg19:2:160033029-160033029,160035067-160035089:+]	0.7919	124	0	-18.68	-0.9689
MIMAT0003322	hsa-miR-652	1912	PHC2	uc001bxf.1	AK128821	guguugGGAUCAC-CGCGGUAa	|||: || |||||||	ggaccaCCUGAUGAGCGCCAUg	2	16	101	122	[hg19:1:33790529-33790550:-]	0.8331	154	7	-20.68	-0.9158
MIMAT0003322	hsa-miR-652	643648	LOC643648	uc004ads.2	BC032596	guguuGGGAUCA-CCGCGGUAa	:::|| | |:|||||	cauuuUUUUACUAUGUGCCAUc	2	17	966	987	[hg19:9:46833116-46833137:+]	0.8279	127	0	-12.76	-0.1729
MIMAT0003322	hsa-miR-652	78987	CRELD1	uc003buf.2	NM_001031717	guguuggGAUCACCG-CGGUAa	|| ||||| |||||	auuggggCU-GUGGCGGCCAUg	2	15	105	125	[hg19:3:9986180-9986200:+]	0.7503	120	0	-18.09	-0.1718
MIMAT0003322	hsa-miR-652	441263	PMS2L11	uc011kgn.1	AK297517	guGUUGGGAU-CAC-CGCGGUAa	| || ||| || |||||||	uuCUACGCUACCUGUGCGCCAUa	2	20	1457	1479	[hg19:7:76673047-76673069:+]	0.6267	153	7	-22.06	-0.6727
MIMAT0003322	hsa-miR-652	11188	NISCH	uc003deg.1	AK075000	guGUUGGGAUCAC---CGCGGUAa	||:||: | | |||||||	gcCAGCCUGCGGGGCAGCGCCAUc	2	20	1700	1723	[hg19:3:52523641-52523664:+]	0.7217	146	7	-22.08	-0.1858
MIMAT0003322	hsa-miR-652	8776	MTMR1	uc011mya.1	AK295738	guGUUGGGAUCAC-CGCGGUAa	|||:|| || |||||||	uuCAAUCCACUUGAGCGCCAUa	2	20	1186	1207	[hg19:X:149932388-149932409:+]	0.5015	158	7	-21.77	-0.2996
MIMAT0003322	hsa-miR-652	84449	ZNF333	uc002mzm.2	CR617489	guguuggGAUCACCG-CGGUAa	|||| ||| |||||	gaguuugCUAG-GGCUGCCAUa	2	15	250	270	[hg19:19:14819509-14819529:+]	0.5301	120	0	-18.4	-0.5016
MIMAT0003322	hsa-miR-652	64839	FBXL17	uc011cvc.1	NM_001163315	gugUUGGGAUCA--C---CGCGGUAa	|| :||||| | |||||||	ggaAAAUCUAGUCAGUAAGCGCCAUg	2	19	1664	1689	[hg19:5:107195732-107195757:-]	0.6328	148	7	-17.19	-0.5919
MIMAT0003322	hsa-miR-652	10866	HCP5	uc011hpt.1	NM_006674	gugUUGGGAUCAC---CGCGGUAa	|| |:||| |||||||	cugAAGGAUGGUGACUGCGCCAUg	2	19	933	956	[hg19:6_mcf_hap5:2812836-2812859:+]	0.9136	145	7	-15.79	-0.3447
MIMAT0003322	hsa-miR-652	1647	GADD45A	uc001ddz.1	NM_001924	gugUUGGGAUCAC-CG-CGGUAa	|:::: |||| || |||||	uaaAGUUUAAGUGUGCAGCCAUa	2	19	320	342	[hg19:1:68153777-68153799:+]	0.5998	121	0	-16.45	-1.1298
MIMAT0003322	hsa-miR-652	4288	MKI67	uc001lke.2	NM_002417	guguUGGGAUCACCG-CGGUAa	||: || |||| |||||	uuguACUAUAUUGGCUGCCAUg	2	18	1313	1334	[hg19:10:129896120-129896141:-]	0.5194	129	0	-15.04	-0.1361
MIMAT0003322	hsa-miR-652	84925	DIRC2	uc003efw.3	NM_032839	guguugGGAUCAC-CGCGGUAa	||| ||| |||||||	ucugcaCCU-GUGUGCGCCAUg	2	16	1408	1428	[hg19:3:122599633-122599653:+]	0.4948	152	7	-21.62	-0.1313
MIMAT0003322	hsa-miR-652	285622	NBPF22P	uc003kiq.2	NR_003719	gugUUGGGAUCACCGC-GGUAa	|||:|| | ||| ||||	aggAACUCU-GCAGCGUCCAUg	2	19	764	784	[hg19:5:85592839-85592859:+]	0.5269	120	0	-16.45	-0.1734
MIMAT0003322	hsa-miR-652	6723	SRM	uc001arz.1	NM_003132	guGUUGGGAUCA--CCGCGGUAa	||:|: | || |||||||	acCAGCUGU-GUACAGCGCCAUc	2	20	204	225	[hg19:1:11114697-11114718:-]	0.5808	144	7	-18.24	-0.5382
MIMAT0003322	hsa-miR-652	197322	ACSF3	uc010cii.1	BC072391	guguuggGAUCACCGCGGUAa	| || ||||||||	ggaggaaCAAG-GGCGCCAUg	2	15	595	614	[hg19:16:89167664-89167683:+]	0.6939	148	7	-18.6	-0.122
MIMAT0003322	hsa-miR-652	8661	EIF3A	uc009xzg.1	AK309542	guGUUGGGAUC-ACCGCGGUAa	::| || || | |||||||	ggUGAGCCGAGAUAGCGCCAUu	2	20	187	208	[hg19:10:120797484-120797505:-]	0.5077	154	7	-18.42	-0.302
MIMAT0003322	hsa-miR-652	127428	C1orf83	uc001cwt.1	NM_153035	guguuGGGAU-CACCGCGGUAa	| ||| | |||||||	gcuguCACUAGGAAGCGCCAUa	2	17	228	249	[hg19:1:54562374-54562395:+]	0.6172	147	7	-19.02	-0.3505
MIMAT0003322	hsa-miR-652	3214	HOXB4	uc002inp.2	NM_024015	gugUUGGGAUCACCGC-GGUAa	::||: :|||||| ||||	acgGGCCUCGGUGGCGACCAUu	2	19	418	439	[hg19:17:46653645-46653666:-]	0.7175	130	0	-28.38	-0.2185
MIMAT0003322	hsa-miR-652	317716	BASE	uc002wyq.2	BC128240	guGUUGGGAUCACCGCGGUAa	||:|:: |||||||	ucCAGCUUCCACAGCGCCAUg	2	20	1038	1058	[hg19:20:31798086-31798106:+]	0.6058	143	7	-16.58	-0.2263
MIMAT0003322	hsa-miR-652	80195	C10orf57	uc001kbo.3	AL832397	guGUUGGGAUCACCGCGGUaa	||| | :| ||||||	uaCAAAC--GGAAGCGCCAaa	3	20	284	302	[hg19:10:81850644-81850662:+]	0.7236	124	0	-14.79	-0.1155
MIMAT0003322	hsa-miR-652	89953	KLC4	uc003otr.1	AK127018	guguuGGGAUCACCG-CGGUAa	|:| || ||| |||||	auugcCUCGAGCGGCAGCCAUc	2	17	1250	1271	[hg19:6:43027347-43027368:+]	0.7439	124	0	-18.54	-0.1194
MIMAT0003322	hsa-miR-652	159296	NKX2-3	uc009xwj.2	NM_145285	guGUUGGGAUCACCGCGGUAa	|:: |||:| |||||||	ugCGGGCCUGG-AGCGCCAUa	2	20	468	487	[hg19:10:101295946-101295965:+]	0.5574	153	7	-24.28	-0.1668
MIMAT0003322	hsa-miR-652	3316	HSPB2	uc009yyj.2	AK293041	guguugggaucacCGCGGUAa	|||||||	ccuuggagacagaGCGCCAUg	2	9	997	1017	[hg19:11:111789679-111789699:+]	0.6839	140	7	-16.55	-0.1969
MIMAT0003322	hsa-miR-652	338579	LOC338579	uc001jcb.1	AK098688	gugUUGGGA--UCAC-CGCGGUAa	||:: | | || |||||||	uggAAUUAUUGAAUGAGCGCCAUa	2	19	748	771	[hg19:10:45666916-45666939:+]	0.5285	144	7	-13.07	-1.0994
MIMAT0003322	hsa-miR-652	10127	ZNF263	uc002cup.2	CR602060	guguugggaucacCGCGGUAa	|||||||	agggaugaugacuGCGCCAUu	2	9	156	176	[hg19:16:3336167-3336187:+]	0.6101	140	7	-13.07	-0.5594
MIMAT0003322	hsa-miR-652	576	BAI2	uc001btp.1	AK123392	guGUUGGGAUCACCGCGGUAa	|||| | ||||||||	ccCAAC---AUCGGCGCCAUc	2	20	415	432	[hg19:1:32193155-32193172:-]	0.681	147	7	-18.25	-0.2411
MIMAT0003322	hsa-miR-652	84747	UNC119B	uc001tyz.2	NM_001080533	gugUUGGGAUCACCG-CGGUAa	|||| | ||| |||||	cagAACCAUUCAGGCUGCCAUg	2	19	2446	2467	[hg19:12:121160281-121160302:+]	0.5604	122	0	-18.67	-0.2382
MIMAT0003322	hsa-miR-652	80195	C10orf57	uc009xsp.2	AK311563	guGUUGGGAUCACCGCGGUaa	||| | :| ||||||	uaCAAAC--GGAAGCGCCAaa	3	20	386	404	[hg19:10:81850644-81850662:+]	0.7236	124	0	-14.79	-0.1078
MIMAT0003322	hsa-miR-652	90957	DHX57	uc002rrg.2	BC060778	guGUUGGGAUC-ACCGCGGUAa	::| || || | |||||||	aaUGAGCCGAGAUUGCGCCAUu	2	20	347	368	[hg19:2:39081759-39081780:-]	0.5071	154	7	-18.34	-0.1175
MIMAT0003322	hsa-miR-652	161142	FAM71D	uc001xiz.2	BC037380	gugUUGGGAU--CAC-CGCGGUAa	| :|| | ||| |||||||	aggACUCCAAGGGUGAGCGCCAUg	2	19	642	665	[hg19:14:67666316-67666339:+]	0.5438	148	7	-21.49	-0.1111
MIMAT0003322	hsa-miR-652	84077	C3orf20	uc003bzb.1	AK131481	guguugggaUCACCGCGGUAa	||| |||||||	ccuccaagaAGUAGCGCCAUc	2	13	657	677	[hg19:3:14814369-14814389:+]	0.5912	152	7	-16.97	-0.3698
MIMAT0003322	hsa-miR-652	93974	ATPIF1	uc001bpp.2	NM_178190	guguugggaUCAC-CGCGGUAa	| || |||||||	cagaaagaaAUUGAGCGCCAUa	2	13	125	146	[hg19:1:28564433-28564454:+]	0.7282	143	7	-13.53	-1.265
MIMAT0003322	hsa-miR-652	340385	ZNF517	uc003zed.1	NM_213605	gugUUGGGAUC-ACCG-CGGUAa	|:||:||| |||| |||||	gggAGCCUUAGCUGGCUGCCAUg	2	19	456	478	[hg19:8:146034236-146034258:+]	0.4979	137	0	-25.76	-0.1228
MIMAT0003322	hsa-miR-652	1806	DPYD	uc001drv.2	NM_000110	gugUUGGGAUC-ACCGCGGUAa	|| : ||| | || ||||	agaAAAUGUAGUUAGCUCCAUa	2	19	469	490	[hg19:1:97544042-97544063:-]	0.6587	121	0	-8.7	-0.1001
MIMAT0003322	hsa-miR-652	79735	TBC1D17	uc002pqs.2	CR609726	guGUUGG-GAUCAC----CGCGGUAa	|| |: ||:||| |||||||	ugCACCUGCUGGUGGCCUGCGCCAUc	2	20	935	960	[hg19:19:50391006-50391031:+]	0.7482	149	7	-23.27	-0.1013
MIMAT0003322	hsa-miR-652	5737	PTGFR	uc001dim.2	NM_001039585	guguugggaucacCGCGGUAa	|||||||	ucuccaaauuacaGCGCCAUa	2	9	3600	3620	[hg19:1:79005715-79005735:+]	0.4966	140	7	-13.57	-0.3406
MIMAT0003322	hsa-miR-652	10043	TOM1	uc003ano.2	AK097926	guGUUGGGAU-CA---CCGCGGUAa	|||| |: || |||||||	cuCAACAAUGUGUUCCUGCGCCAUg	2	20	1102	1126	[hg19:22:35726445-35726469:+]	0.7679	141	7	-18.1	-0.4836
MIMAT0003322	hsa-miR-652	5383	PMS2L5	uc003txn.3	AK309660	guGUUGGGAU-CAC-CGCGGUAa	| || ||| || |||||||	uuCUACGCUACCUGUGCGCCAUa	2	20	390	412	[hg19:7:72511821-72511843:+]	0.6343	153	7	-22.06	-1.0836
MIMAT0003322	hsa-miR-652	9603	NFE2L3	uc003sxq.2	NM_004289	guguuGGGAUCACCG-CGGUAa	|| | |||| |||||	acuuuCCAUCUUGGCAGCCAUc	2	17	280	301	[hg19:7:26225683-26225704:+]	0.4527	120	0	-17.32	-0.3722
MIMAT0003322	hsa-miR-652	7422	VEGFA	uc003owk.2	AF323587	guGUUGGGAUCACCG-CGGUAa	||||||| | || |||||	gcCAACCCU--U-GCAGCCAUg	2	20	493	511	[hg19:6:43745952-43745970:+]	0.6101	122	0	-20.65	-0.1241
MIMAT0003322	hsa-miR-652	64768	IPPK	uc004asl.1	NM_022755	guguugggauCACCGCGGUAa	| ||||||||	guuuaaagauGAGGCGCCAUa	2	12	2251	2271	[hg19:9:95375843-95375863:-]	0.4834	147	7	-15.61	-0.116
MIMAT0003322	hsa-miR-652	79658	ARHGAP10	uc003ile.1	AK123785	guguUGGGAUCACCG-CGGUAa	|:::|:| ||| |||||	auuuAUUUUGGAGGCAGCCAUa	2	18	471	492	[hg19:4:148779282-148779303:+]	0.5321	125	0	-17.53	-0.7993
MIMAT0003322	hsa-miR-652	9442	MED27	uc004cbe.1	NM_004269	guguugggaUCACCGCGGUAa	|| |||||||	cuuucauaaAGCAGCGCCAUg	2	13	114	134	[hg19:9:134735791-134735811:-]	0.4404	144	7	-15.25	-0.2499
MIMAT0003322	hsa-miR-652	148206	ZNF714	uc010ecp.1	BC037782	guGUUGGGAUC-ACCGCGGUAa	::| || || | |||||||	agUGAGCCAAGAUCGCGCCAUu	2	20	61	82	[hg19:19:21301196-21301217:+]	0.5085	154	7	-18.13	-0.2325
MIMAT0003322	hsa-miR-652	121273	C12orf54	uc009zky.1	AY255794	guGUUGGGAUCAC-CG-CGGUAa	||:|:||:| | || |||||	uuCAGCUCUGGAGAGCAGCCAUc	2	20	551	573	[hg19:12:48888633-48888655:+]	0.5965	130	0	-22.83	-0.3631
MIMAT0003322	hsa-miR-652	5383	PMS2L5	uc003ubm.3	NR_027777	guGUUGGGAU-CAC-CGCGGUAa	| || ||| || |||||||	uuCUACGCUACCUGUGCGCCAUa	2	20	348	370	[hg19:7:74313903-74313925:+]	0.6736	153	7	-22.06	-1.1101
MIMAT0003322	hsa-miR-652	3776	KCNK2	uc009xdm.2	AY552981	guguugggaucacCGCGGUAa	|||||||	uauaugguggaauGCGCCAUg	2	9	3340	3360	[hg19:1:215410366-215410386:+]	0.7423	140	7	-16.34	-0.4084
MIMAT0003322	hsa-miR-652	53346	TM6SF1	uc010bmr.2	BC032007	guguugggAUCACCG-CGGUAa	|:||||| |||||	ccuggugaUGGUGGCAGCCAUa	2	14	478	499	[hg19:15:83788404-83788425:+]	0.7633	125	0	-18.77	-0.4974
MIMAT0003322	hsa-miR-652	1378	CR1	uc009xck.1	X14362	guguuggGAUCACCG-CGGUAa	|||| ||| |||||	ucccuugCUAG-GGCUGCCAUc	2	15	362	382	[hg19:1:207743657-207743677:+]	0.5126	120	0	-19.27	-0.3446
MIMAT0003322	hsa-miR-652	340152	ZC3H12D	uc003qmm.2	NM_207360	guGUUGGGAUCACCG-CGGUAa	| |||| |||| |||||	ccCCACCCCCUUGGCAGCCAUg	2	20	733	754	[hg19:6:149771390-149771411:-]	0.4972	127	0	-22.15	-0.2223
MIMAT0003322	hsa-miR-652	94241	TP53INP1	uc003yhh.2	NM_001135733	guguugggAUCACCGCGGUAa	|||| |||||||	agcuuuuaUAGU-GCGCCAUg	2	14	3009	3028	[hg19:8:95939945-95939964:-]	0.6031	151	7	-16.54	-0.1737
MIMAT0003322	hsa-miR-652	55723	ASF1B	uc002mye.2	NM_018154	guguuGGGAUCACCG-CGGUAa	:|||:| ||| |||||	gcuuuUCCUGGAGGCUGCCAUg	2	17	637	658	[hg19:19:14230613-14230634:-]	0.498	128	0	-21.94	-0.1404
MIMAT0003322	hsa-miR-652	2970	GTF2IP1	uc011keq.1	AK299175	gugUUGGGAU-CACCGC-GGUAa	:|: ||: |||||| ||||	aggGAUGCUGUGUGGCGUCCAUc	2	19	37	59	[hg19:7:72619518-72619540:+]	0.5821	125	0	-20.87	-0.1244
MIMAT0003322	hsa-miR-652	83990	BRIP1	uc002izl.1	AK074713	gugUUGGGAUCACCGCGGUAa	|:|| : | |||||||	gugAGCCAGGAUUGCGCCAUu	2	19	927	947	[hg19:17:59762170-59762190:-]	0.5058	150	7	-17.85	-0.1136
MIMAT0003322	hsa-miR-652	8019	BRD3	uc004cew.2	NM_007371	guguuGGGAUCACCG-CGGUAa	:|| || ||| |||||	uguuuUCCCAGAGGCUGCCAUa	2	17	1414	1435	[hg19:9:136897277-136897298:-]	0.5799	124	0	-19.42	-0.1174
MIMAT0003322	hsa-miR-652	80195	C10orf57	uc001kbn.3	BX537803	guGUUGGGAUCACCGCGGUaa	||| | :| ||||||	uaCAAAC--GGAAGCGCCAaa	3	20	379	397	[hg19:10:81850644-81850662:+]	0.7236	124	0	-14.79	-0.1083
MIMAT0003322	hsa-miR-652	23759	PPIL2	uc002zvi.3	NM_148175	gugUUGGGAUCACCGCGGUAa	||| | |||||||	aagAACAAGAACUGCGCCAUg	2	19	222	242	[hg19:22:22051251-22051271:+]	0.4802	142	7	-13.84	-0.2087
MIMAT0003322	hsa-miR-652	129563	DIS3L2	uc002vsp.1	CR598716	guGUUGGGA--UCA--CCGCGGUAa	||:|||| ||| |||||||	caCAGCCCUCAAGUACAGCGCCAUc	2	20	478	502	[hg19:2:233201226-233201250:+]	0.6645	157	7	-28.44	-0.3586
MIMAT0003322	hsa-miR-652	3352	HTR1D	uc001bgn.2	NM_000864	guGUUGGGAUCACCGCGGUAa	||| : |: |||||||	ccCAA-UAUGCCUGCGCCAUc	2	20	959	978	[hg19:1:23518601-23518620:-]	0.6042	141	7	-14.62	-0.6414
MIMAT0003322	hsa-miR-652	29979	UBQLN1	uc004amv.2	NM_013438	guguugggaucaccGCGGUAa	||||||	caguuauuuuuaauCGCCAUa	2	8	930	950	[hg19:9:86275752-86275772:-]	0.7329	120	6	-10.45	-0.5868
MIMAT0003322	hsa-miR-652	3683	ITGAL	uc002dyi.3	NM_002209	guGUUGGGAUC-ACCGCGGUAa	::| || || | |||||||	agUGAGCCAAGAUUGCGCCAUu	2	20	1223	1244	[hg19:16:30534209-30534230:+]	0.5082	154	7	-18.18	-0.1897
MIMAT0003322	hsa-miR-652	196385	DNAH10	uc010tav.1	BC150622	gugUUGGGA-UCACCGCGGUAa	:::|:| | | |||||||	uugGGUCUUCAUUUGCGCCAUu	2	19	23	44	[hg19:12:124298231-124298252:+]	0.3715	149	7	-15.99	-0.7551
MIMAT0003322	hsa-miR-652	4148	MATN3	uc002rdl.2	NM_002381	guguuggGAUCACCGCGGUAa	||| | | |||||	uuaucuaCUAAUUGAGCCAUu	2	15	285	305	[hg19:2:20192567-20192587:-]	0.624	122	0	-9.6	-0.1177
MIMAT0003322	hsa-miR-652	152687	ZNF595	uc010iay.1	AK309855	guguugggaUCACCGCGGUAa	|||||||||||	guggagugcAGUGGCGCCAUc	2	13	456	476	[hg19:4:67805-67825:+]	0.6798	160	7	-23.2	-0.1954
MIMAT0003322	hsa-miR-652	5663	PSEN1	uc001xnu.2	U40380	guGUUGGGAUCACCG-CGGUAa	|||::||: || |||||	cuCAAUUCUGAAUGCUGCCAUc	2	20	434	455	[hg19:14:73640328-73640349:+]	0.7494	123	0	-18.09	-0.1168
MIMAT0003322	hsa-miR-652	84717	HDGFRP2	uc010dtz.1	AB208892	guguugggaucaCCGCGGUAa	||||||||	gaaaaaaaagaaGGCGCCAUc	2	10	520	540	[hg19:19:4491823-4491832,4493700-4493710:+]	0.5892	145	7	-15.84	-0.1292
MIMAT0003322	hsa-miR-652	2517	FUCA1	uc001bie.2	NM_000147	guGUUGGGAUCACCGCGGUaa	||| :||| ||||||	agCAA-UCUAAAAGCGCCAaa	3	20	507	526	[hg19:1:24171679-24171698:-]	0.5651	133	0	-16.24	-0.199
MIMAT0003322	hsa-miR-652	80262	C16orf70	uc002ere.1	AK022138	guGUUGGGAUC-ACCGCGGUAa	::| |: || | |||||||	agUGAGCUGAGAUAGCGCCAUu	2	20	1976	1997	[hg19:16:67170148-67170169:+]	0.5075	150	7	-15.88	-0.1227
MIMAT0003322	hsa-miR-652	682	BSG	uc002lpd.2	CR622629	guguugGGAUCACCGCGGUAa	:||:|| |||||||	augcugUCUGGUUGCGCCAUu	2	16	468	488	[hg19:19:583130-583150:+]	0.5074	159	7	-21.86	-0.8232
MIMAT0003322	hsa-miR-652	90933	TRIM41	uc003mnd.1	NM_201627	gugUUGGGAUC--ACC-GCGGUAa	|: :||:| ||| ||||||	gagAGAUCUGGAAUGGUCGCCAUg	2	19	1	24	[hg19:5:180662380-180662403:+]	0.6483	121	6	-18.35	-0.7588
MIMAT0003322	hsa-miR-652	57653	KIAA1529	uc011lur.1	AK301827	gugUUGGGAUCACCGC-GGUAa	|::|: :|||||| ||||	aggAGUCUGGGUGGCGACCAUu	2	19	696	717	[hg19:9:100043950-100043951,100049942-100049961:+]	0.7093	130	0	-23.08	-0.3415
MIMAT0003322	hsa-miR-652	57494	RIMKLB	uc009zgf.1	BC033793	guGUUGGGAU-CACCGCGGUAa	|| | ||: | |||||||	gaCAUCACUGUUUUGCGCCAUc	2	20	517	538	[hg19:12:8902544-8902565:+]	0.8428	150	7	-16.46	-0.8659
MIMAT0003322	hsa-miR-652	57494	RIMKLB	uc009zgf.1	BC033793	guguugGGAUCACCGCGGUAa	|| | |||||||	uauucgCCAUGAAGCGCCAUa	2	16	804	824	[hg19:12:8906541-8906561:+]	0.8168	143	7	-14.85	-1.1363
MIMAT0003322	hsa-miR-652	93034	NT5C1B	uc002rdb.1	AK097848	guguugggaucaccGCGGUAa	||||||	uaguagaaauaaaaCGCCAUa	2	8	181	201	[hg19:2:18765018-18765038:-]	0.5646	120	6	-10.97	-0.1979
MIMAT0003322	hsa-miR-652	158435	LOC158435	uc004avy.3	BC064972	guGUUGGGAUCACCGCGGUAa	|| :|| | |||||||	uaCACUCCCAUCAGCGCCAUg	2	20	2200	2220	[hg19:9:98863972-98863992:+]	0.5188	151	7	-20.55	-0.1916
MIMAT0003322	hsa-miR-652	51504	TRMT112	uc001nzt.2	NM_016404	guguugggaucaCCGCGGUaa	|||||||	----uugugccaGGCGCCAgu	3	10	1	17	[hg19:11:64084316-64084332:-]	0.5244	125	0	-15.42	-0.113
MIMAT0003322	hsa-miR-652	126549	ANKLE1	uc010xpn.1	AK299977	guGUUGGGAUCACCGCGGUAa	|| :|| | |||||||	uaCACUCCCACCAGCGCCAUg	2	20	391	411	[hg19:19:17397915-17397935:+]	0.5082	151	7	-20.55	-0.3297
MIMAT0003322	hsa-miR-652	7157	TP53	uc002gih.2	AM076972	guGUUGGGAUC-ACCGCGGUAa	::| || || | |||||||	agUGAGCCGAGAUUGCGCCAUu	2	20	62	83	[hg19:17:7569441-7569462:-]	0.5122	154	7	-18.34	-0.5599
MIMAT0003322	hsa-miR-652	162083	C16orf82	uc010vcm.1	NM_001145545	guGUUGGGAUCAC-CGCGGUAa	|| |: |||| |||||||	acCAUCUGCAGUGAGCGCCAUg	2	20	914	935	[hg19:16:27079695-27079716:+]	0.5396	158	7	-20.63	-0.114
MIMAT0003322	hsa-miR-652	64087	MCCC2	uc003kbs.3	NM_022132	guguUGGGAUCAC-CG-CGGUAa	|| ||: || || |||||	ccucACACUGCUGUGCAGCCAUc	2	18	439	461	[hg19:5:70953126-70953148:+]	0.5229	120	0	-17.58	-0.128
MIMAT0003322	hsa-miR-652	149076	ZNF362	uc001bxc.1	NM_152493	guguugggaucaccGCGGUAa	||||||	uuuaagccuuaacuCGCCAUu	2	8	1195	1215	[hg19:1:33765842-33765862:+]	0.79	120	6	-17.79	-0.1078
MIMAT0003322	hsa-miR-652	153562	MARVELD2	uc003jws.1	DQ682658	gugUUGG--GAUCACCGCGGUaa	|||| ||| | ||||||	aagAACCAGCUA-UAGCGCCAga	3	19	215	236	[hg19:5:68715412-68715433:+]	0.7015	135	0	-15.36	-0.1062
MIMAT0003322	hsa-miR-652	3996	LLGL1	uc002gsp.2	NM_004140	guguugggaUCACCGCGGUAa	| | |||||||	uuuguuaaaAUUAGCGCCAUu	2	13	890	910	[hg19:17:18148110-18148130:+]	0.6389	144	7	-13.57	-1.3028
MIMAT0003322	hsa-miR-652	64127	NOD2	uc010cbn.1	AY187240	guguUGGGAU-CACCGCGGUAa	|||: | | |||||||	cuguACCUGAGGAAGCGCCAUc	2	18	714	735	[hg19:16:50745182-50745203:+]	0.6481	148	7	-18.89	-0.2224
MIMAT0003322	hsa-miR-652	80195	C10orf57	uc009xsn.2	AK309425	guGUUGGGAUCACCGCGGUaa	||| | :| ||||||	uaCAAAC--GGAAGCGCCAaa	3	20	132	150	[hg19:10:81850644-81850662:+]	0.7236	124	0	-14.79	-0.1278
MIMAT0003322	hsa-miR-652	7422	VEGFA	uc003owd.2	NM_001025369	guguugggaucaccGCGGUAa	||||||	cuuggaauuggauuCGCCAUu	2	8	261	281	[hg19:6:43752544-43752564:+]	0.7763	120	6	-14.9	-0.1227
MIMAT0003322	hsa-miR-652	91977	MYOZ3	uc003lsr.2	NM_133371	guGUUGGGAUCACCG-CGGUAa	::| ::|:| ||| |||||	cuUGAAUUUGGGGGCUGCCAUu	2	20	2209	2230	[hg19:5:150058646-150058667:+]	0.5692	123	0	-17.48	-0.2897
MIMAT0003322	hsa-miR-652	85453	TSPYL5	uc003yhy.2	NM_033512	gugUUGGGAUCACCG-CGGUAa	||||| | ||| |||||	auaAACCCCA-AGGCAGCCAUg	2	19	1466	1486	[hg19:8:98287333-98287353:-]	0.5365	124	0	-18.76	-0.1436
MIMAT0003322	hsa-miR-652	124925	SEZ6	uc010cry.1	NM_001098635	guGUUGGGAUCACCGCGGUAa	:| :||| |||||||	ggUACUCCUCACAGCGCCAUc	2	20	411	431	[hg19:17:27282536-27282556:-]	0.5855	147	7	-17.3	-0.2656
MIMAT0003322	hsa-miR-652	84958	SYTL1	uc001bnx.2	AK074154	guGUUGGGAUCACCGCGG-UAa	||:| : | ||||||| ||	uuCAGCGUGACUGGCGCCUAUa	2	20	1796	1817	[hg19:1:27678235-27678256:+]	0.5455	127	0	-18.9	-0.1121
MIMAT0003322	hsa-miR-652	9144	SYNGR2	uc010dhi.1	CR614467	guGUUGGGAU-C-ACCG-CGGUAa	|:||:||: | ||| |||||	gcCGACUCUGUGAGGGCAGCCAUc	2	20	213	236	[hg19:17:76167677-76167700:+]	0.6442	121	0	-23.56	-0.1355
MIMAT0003322	hsa-miR-652	650655	ABCA17P	uc002cqb.1	BC042853	gugUUGG--GAUCACCG-CGGUAa	:||| ||| | || |||||	aaaGACCUGCUACUAGCUGCCAUg	2	19	725	748	[hg19:16:2411643-2411666:+]	0.6293	121	0	-13.5	-0.4994
MIMAT0003322	hsa-miR-652	56243	KIAA1217	uc010qda.1	AK303905	guGUUGGGAUCACCGCGGUAa	||| || | |||||||	ucCAAGCCCA--AGCGCCAUu	2	20	998	1016	[hg19:10:24762393-24762411:+]	0.7605	148	7	-19.49	-0.8971
MIMAT0003322	hsa-miR-652	199990	C1orf86	uc001aiy.2	NM_182533	guguugggaucacCGCGGUAa	|||||||	-------------GCGCCAUc	2	9	1	8	[hg19:1:2121140-2121147:-]	0.5478	140	7	-11.19	-0.184
MIMAT0003322	hsa-miR-652	286527	TMSB15B	uc004eln.1	AK090973	gugUUGGGAUCACCGCGGUAa	|: || | ||||||||	gagAGACCAA--GGCGCCAUu	2	19	1180	1198	[hg19:X:103186372-103186390:+]	0.5082	147	7	-20.09	-0.1456
MIMAT0003322	hsa-miR-652	6715	SRD5A1	uc011cml.1	AK297208	guGUUGGGAU--CACCGCG-GUAa	::||::|| |||||| |||	uaUGACUUUACCCUGGCGCACAUg	2	20	911	934	[hg19:5:6645348-6645371:+]	0.532	122	0	-19.61	-0.1225
MIMAT0003322	hsa-miR-652	123355	LRRC28	uc010urs.1	AK293832	guGUUGGGAU-CAC--CGCGGUAa	| |: || ||| |||||||	guCUAUGGUAUGUGCCGCGCCAUc	2	20	563	586	[hg19:15:99874245-99874268:+]	0.796	145	7	-14.62	-0.2606
MIMAT0003322	hsa-miR-652	26223	FBXL21	uc003lbc.2	BC044938	guGUUG-GGAUCACCG-CGGUAa	:||: ||| |||| |||||	caUAAUACCUCCUGGCAGCCAUg	2	20	770	792	[hg19:5:135276562-135276584:+]	0.4088	126	0	-22.3	-0.1024
MIMAT0003322	hsa-miR-652	54970	TTC12	uc001pnw.2	BC032355	guGUUGGGAUCACCGCGGUAa	||: :| | | |||||||	ggCAGGUC-ACU-GCGCCAUu	2	20	47	65	[hg19:11:113185297-113185315:+]	0.5347	143	7	-17.55	-0.1593
MIMAT0003322	hsa-miR-652	54970	TTC12	uc001pnw.2	BC032355	guguugggAUCACCGCGGUAa	|| |||||||	auggaaaaUACCAGCGCCAUc	2	14	2336	2356	[hg19:11:113239097-113239117:+]	0.5295	141	7	-13.84	-0.2631
MIMAT0003322	hsa-miR-652	157739	TDH	uc003wtt.1	AY101187	guGUUGGGAUCACCGCGGUAa	| || |: |||||||	acCUACAAUGUCAGCGCCAUg	2	20	696	716	[hg19:8:11222384-11222404:+]	0.7869	143	7	-15.32	-0.8712
MIMAT0003322	hsa-miR-652	220107	DLEU7	uc001vex.2	NM_198989	guguugggaucacCGCGGUaa	||||||	cuccgauuggaacGCGCCAca	3	9	189	209	[hg19:13:51287144-51287164:-]	0.7018	120	0	-13.16	-0.1353
MIMAT0003322	hsa-miR-652	51747	LUC7L3	uc002isq.2	AK225980	guguugggaucaccGCGGUAa	||||||	--------uauaguCGCCAUu	2	8	1	13	[hg19:17:48828299-48828311:+]	0.6369	120	6	-12.84	-0.1803
MIMAT0003322	hsa-miR-652	3776	KCNK2	uc001hkp.2	AK123409	guguugggaucacCGCGGUAa	|||||||	uauaugguggaauGCGCCAUg	2	9	3409	3429	[hg19:1:215410366-215410386:+]	0.7423	140	7	-16.34	-0.3955
MIMAT0003322	hsa-miR-652	100272146	LOC100272146	uc010wks.1	NR_027416	guguuGGGAUCACCG-CGGUAa	|| | |||| |||||	acuuuCCAUCUUGGCAGCCAUc	2	17	2964	2985	[hg19:17:45503806-45503827:+]	0.5043	120	0	-17.32	-0.184
MIMAT0003322	hsa-miR-652	653145	ANXA8	uc010qgh.1	AK300139	guguugggaucaccGCGGUAa	||||||	acgaaaaauucucuCGCCAUc	2	8	584	604	[hg19:10:48271099-48271119:+]	0.5238	120	6	-14.83	-0.1206
MIMAT0003322	hsa-miR-652	50964	SOST	uc002iec.1	NM_025237	gugUUGGGAUCAC-CG-CGGUAa	::||| || | || |||||	gcaGGCCCGAGGGAGCAGCCAUc	2	19	1056	1078	[hg19:17:41831632-41831654:-]	0.5155	121	0	-19.89	-0.1203
MIMAT0003322	hsa-miR-652	157739	TDH	uc003wts.1	AK057762	guGUUGGGAUCACCGCGGUAa	| || |: |||||||	acCUACAAUGUCAGCGCCAUg	2	20	801	821	[hg19:8:11222384-11222404:+]	0.7869	143	7	-15.32	-0.7768
MIMAT0003322	hsa-miR-652	25819	CCRN4L	uc003ihk.1	BC077723	guGUUGGGAUC-ACCGCGGUAa	::| |: || | |||||||	agUGAGCUGAGAUUGCGCCAUu	2	20	469	490	[hg19:4:139965010-139965031:+]	0.5018	150	7	-15.8	-0.3802
MIMAT0003322	hsa-miR-652	5396	PRRX1	uc001ghe.2	NM_006902	gugUUGGGA-UCACCGCGGUAa	:|| || | |||||||	gaaGACACUGAAAAGCGCCAUg	2	19	3	24	[hg19:1:170699475-170699489,170705189-170705195:+]	0.7889	145	7	-14.63	-0.2082
MIMAT0003322	hsa-miR-652	4297	MLL	uc001pte.1	S78570	guguUGGGAUCACCGCGGUaa	::| |: | ||||||	cuguGUCAUGAUUGCGCCAag	3	18	915	935	[hg19:11:118360931-118360951:+]	0.8351	129	0	-10.55	-0.117
MIMAT0003322	hsa-miR-652	64595	TTTY15	uc004fss.2	NR_001545	guguugggaucacCGCGGUAa	|||||||	-------------GCGCCAUa	2	9	1	8	[hg19:Y:14774298-14774305:+]	0.6516	140	7	-10.96	-0.1676
MIMAT0003322	hsa-miR-652	154664	ABCA13	uc003top.2	BX647560	guguugggaUCA-CCGCGGUAa	||| |||||||	auuuaaaaaAGUCAGCGCCAUa	2	13	218	239	[hg19:7:48267244-48267265:+]	0.517	143	7	-13.23	-0.9326
MIMAT0003322	hsa-miR-652	403340	MGC70870	uc002kgk.3	NR_003682	guguugggAUCA-CCGCGGUAa	| || ||||||||	aaacgaagUCGUGGGCGCCAUg	2	14	774	795	[hg19:17_gl000205_random:117396-117417:+]	0.7772	148	7	-20.27	-0.1571
MIMAT0003322	hsa-miR-652	26017	FAM32A	uc002ndt.2	NM_014077	guguugggaUC-ACCGCGGUAa	|| | |||||||	aggguaaggAGCUAGCGCCAUg	2	13	369	390	[hg19:19:16302135-16302156:+]	0.5616	143	7	-13.11	-0.1524
MIMAT0003322	hsa-miR-652	22890	ZBTB1	uc010aqg.2	NM_001123329	guguugggaucaccGCGGUAa	||||||	aaauugcaguuuauCGCCAUa	2	8	1080	1100	[hg19:14:64991444-64991464:+]	0.5535	120	6	-11.25	-0.1879
MIMAT0003322	hsa-miR-652	9211	LGI1	uc001kje.2	CR621328	gugUUGGGAUCACCG-CGGUAa	||::|| ||||| |||||	ccaAAUUCU-GUGGCUGCCAUc	2	19	1126	1146	[hg19:10:95557565-95557585:+]	0.6951	132	0	-22.2	-0.5349
MIMAT0003322	hsa-miR-652	10250	SRRM1	uc010oem.1	AK293576	guGUUGGGAUC-ACCGCGGUAa	|:| ||||| ||||||||	cuCGA-CCUAGACGGCGCCAUa	2	20	563	583	[hg19:1:24979086-24979106:+]	0.7326	160	7	-25.5	-0.6341
MIMAT0003322	hsa-miR-652	10250	SRRM1	uc010oem.1	AK293576	gugUUGGGAUC-ACCG-CGGUAa	|:||| || ||| |||||	ccaAGCCCAAGAAGGCGGCCAUc	2	19	619	641	[hg19:1:24979426-24979448:+]	0.7397	125	0	-20.68	-0.2384
MIMAT0003322	hsa-miR-652	6939	TCF15	uc002wdz.2	NM_004609	guguuGGGAUCACCGCGGUAa	|:|| ||||||||	gccccCUCUCCGGGCGCCAUa	2	17	479	499	[hg19:20:584736-584756:-]	0.4442	152	7	-21.79	-0.1452
MIMAT0003322	hsa-miR-652	401074	LOC401074	uc003dpu.2	BC039495	guguuGGGAUCACCGCGGUAa	|| | | |:|||||	uugcuCCACAAU-GUGCCAUa	2	17	1334	1353	[hg19:3:75728337-75728356:+]	0.9189	126	0	-13.42	-0.2198
MIMAT0003322	hsa-miR-652	51501	C11orf73	uc001pbt.2	CR592099	guguugggAUCACCGCGGUAa	|| || ||||||	uuuuguuaUAUUGUCGCCAUu	2	14	133	153	[hg19:11:86055942-86055962:+]	0.5624	125	6	-11.93	-0.1507
MIMAT0003322	hsa-miR-652	7363	UGT2B4	uc003hel.3	AY529122	guguugggaucacCGCGGUAa	|||||||	uugaauuugucauGCGCCAUa	2	9	61	81	[hg19:4:70346528-70346548:-]	0.6037	140	7	-12.84	-1.1415
MIMAT0003322	hsa-miR-652	51545	ZNF581	uc002qlq.2	NM_016535	guguugggaucacCGCGGUAa	|||||||	ucgucaggaaucuGCGCCAUc	2	9	332	352	[hg19:19:56156863-56156883:+]	0.5269	140	7	-14.77	-0.1536
MIMAT0003322	hsa-miR-652	5663	PSEN1	uc001xnt.1	AF416717	guGUUGGGAUCACCG-CGGUAa	|||::||: || |||||	cuCAAUUCUGAAUGCUGCCAUc	2	20	446	467	[hg19:14:73640328-73640349:+]	0.7494	123	0	-18.09	-0.8853
MIMAT0003322	hsa-miR-652	3670	ISL1	uc003jor.2	NM_002202	guguugggaucacCGCGGUAa	|||||||	augugaaaucaaaGCGCCAUa	2	9	1038	1058	[hg19:5:50690482-50690502:+]	0.766	140	7	-13.02	-1.3347
MIMAT0003322	hsa-miR-652	84909	C9orf3	uc004avc.2	CR592311	gugUUGGGAUCA-CCGCGGUAa	|: || ||| ||||||||	augAGACC-AGUGGGCGCCAUu	2	19	134	154	[hg19:9:97849358-97849378:+]	0.4788	155	7	-23.07	-0.521
MIMAT0003322	hsa-miR-652	55069	C7orf42	uc010lah.2	BC010519	guGUUGGGAUCA-CCGCGGUAa	::|:| || |||||||	caUGAUCAGCGUAAGCGCCAUg	2	20	333	354	[hg19:7:66406921-66406942:+]	0.8002	142	7	-15.9	-0.1291
MIMAT0003322	hsa-miR-652	5023	P2RX1	uc002fww.2	NM_002558	guguuggGAUCACCG-CGGUAa	:||||||| |||||	cguguggUUAGUGGCUGCCAUa	2	15	467	488	[hg19:17:3800620-3800641:-]	0.5429	130	0	-21.51	-0.1293
MIMAT0003322	hsa-miR-652	440423	SUZ12P	uc002hfp.2	NR_024187	guGUUGGGAUC-ACCGCGGUAa	::| || || | |||||||	agUGAGCCAAGAUUGCGCCAUu	2	20	825	846	[hg19:17:29085292-29085313:+]	0.5083	154	7	-18.18	-0.5022
MIMAT0003322	hsa-miR-652	54968	TMEM70	uc003yab.2	NM_017866	gugUUGGGAUCACCG-CGGUAa	|| ||| | || |||||	aggAAGCCUUGCAGCAGCCAUg	2	19	485	506	[hg19:8:74894341-74894362:+]	0.5207	122	0	-15.93	-0.1066
MIMAT0003322	hsa-miR-652	401074	LOC401074	uc003dpv.2	BC111371	guguuGGGAUCACCGCGGUAa	|| | | |:|||||	uugcuCCACAAU-GUGCCAUa	2	17	1173	1192	[hg19:3:75728337-75728356:+]	0.9189	126	0	-13.42	-0.24
MIMAT0003322	hsa-miR-652	51535	PPHLN1	uc010skr.1	AK303612	guguUGGGAUCACCGCG-GUAa	|||: | | |||| |||	ucucACCUAAUUAGCGCACAUg	2	18	382	403	[hg19:12:42839293-42839314:+]	0.5075	121	0	-12.99	-0.264
MIMAT0003322	hsa-miR-652	4771	NF2	uc011akq.1	AK297116	gugUUGGGA-UCAC--CGCGGUAa	::|::| || | |||||||	cagGGCUUUCAGGGAAGCGCCAUc	2	19	3620	3643	[hg19:22:30094418-30094441:+]	0.5667	144	7	-18.37	-0.1858
MIMAT0003322	hsa-miR-652	55572	FOXRED1	uc010sbo.1	AK298010	guGUUGGG-AUC-ACCGCGGUAa	||:||: |:| |||||||	acCAGCCUGUGGAAUGCGCCAUu	2	20	567	589	[hg19:11:126145979-126146001:+]	0.7333	149	7	-23.23	-0.5983
MIMAT0003322	hsa-miR-652	4122	MAN2A2	uc010uqn.1	AK299213	gugUUGGGAUCA-CCGCG-GUAa	::||||:|| |||| |||	ccaGGCCCUGGUCUGCGCUCAUu	2	19	868	890	[hg19:15:91461529-91461551:+]	0.6996	125	0	-24.15	-0.1834
MIMAT0003322	hsa-miR-652	63917	GALNT11	uc011kvn.1	AK296097	guGUUGGGAUC-ACC-GCGGUAa	||:|||| | ||| ||||||	ugCAGCCCUUGCUGGCCGCCAUc	2	20	746	768	[hg19:7:151805174-151805196:+]	0.7519	138	6	-27.3	-0.116
MIMAT0003322	hsa-miR-652	283767	GOLGA6L1	uc010uaj.1	BC127816	gugUUG-GGAUCACCG-CGGUAa	|:| |||:| || |||||	--gAGCACCUGGAAGCUGCCAUc	2	19	1	21	[hg19:15:28807182-28807202:+]	0.5451	121	0	-18.99	-0.3786
MIMAT0003322	hsa-miR-652	285671	RNF180	uc003jti.2	NM_001113561	gugUUGGGA-UCACCG-CGGUAa	|||::| | | || |||||	aagAACUUUAAAUUGCAGCCAUu	2	19	1568	1590	[hg19:5:63667209-63667231:+]	0.532	121	0	-14.54	-0.2101
MIMAT0003322	hsa-miR-652	284948	SH2D6	uc002spp.2	BC110073	guguuGGGAUCACCG-CGGUAa	||: ||||| |||||	cuucuCCUCCGUGGCGGCCAUg	2	17	797	818	[hg19:2:85663591-85663612:+]	0.7504	124	0	-20.29	-0.3528
MIMAT0003322	hsa-miR-652	5383	PMS2L5	uc011kep.1	BC152850	guGUUGGGAU-CAC-CGCGGUAa	| || ||| || |||||||	uuCUACGCUACCUGUGCGCCAUa	2	20	223	245	[hg19:7:72511821-72511843:+]	0.6343	153	7	-22.06	-1.1291
MIMAT0003322	hsa-miR-652	27240	SIT1	uc003zxe.1	NM_014450	guGUUGGGAUC--ACCGCGGUAa	|| || || ||||||||	agCACCCAAAGACGGGCGCCAUu	2	20	74	96	[hg19:9:35649749-35649771:-]	0.549	150	7	-24.24	-0.1116
MIMAT0003322	hsa-miR-652	5387	PMS2L3	uc003udq.2	NM_001003686	guGUUGGGAU-CAC-CGCGGUAa	| || ||| || |||||||	uuCUACGCUACCUGUGCGCCAUa	2	20	286	308	[hg19:7:75140279-75140301:-]	0.5141	153	7	-22.06	-1.0064
MIMAT0003322	hsa-miR-652	4147	MATN2	uc003yib.1	AK075489	guGUUGGGAUC-ACCGCGGUAa	::| |: || | |||||||	agUGAGCUGAGAUUGCGCCAUu	2	20	416	437	[hg19:8:99016456-99016477:+]	0.5026	150	7	-15.8	-0.2374
MIMAT0003322	hsa-miR-652	161142	FAM71D	uc010tsv.1	AK302154	gugUUGGGAU--CAC-CGCGGUAa	| :|| | ||| |||||||	aggACUCCAAGGGUGAGCGCCAUg	2	19	645	668	[hg19:14:67666316-67666339:+]	0.5438	148	7	-21.49	-0.1109
MIMAT0003322	hsa-miR-652	84984	C3orf34	uc011btw.1	NM_032898	guGUUGGGAUC-ACCGCGGUAa	::| || || | |||||||	agUGAGCCGAGAUCGCGCCAUu	2	20	444	465	[hg19:3:196433957-196433978:-]	0.5099	154	7	-18.29	-0.129
MIMAT0003322	hsa-miR-652	51362	CDC40	uc003pua.2	NM_015891	guguugGGAUCACCG-CGGUAa	||||| || |||||	acauugCCUAGCUGCUGCCAUu	2	16	1774	1795	[hg19:6:110553108-110553129:+]	0.5721	123	0	-21.66	-0.2903
MIMAT0003322	hsa-miR-652	5664	PSEN2	uc001hqk.2	U34349	guguUGGGAUCACCGCGGUAa	|:|||: ||||||||	ggucAUCCUG--GGCGCCAUc	2	18	965	983	[hg19:1:227076722-227076740:+]	0.7676	154	7	-22.35	-0.148
MIMAT0003322	hsa-miR-652	6998	TDGF3	uc004eos.1	NR_002718	gugUUGGGAUCACCGCGGUAa	|| |:|: |||||||	---AAGCUUG--CGCGCCAUg	2	19	1	16	[hg19:X:109763540-109763555:+]	0.7079	143	7	-13.92	-0.4594
MIMAT0003322	hsa-miR-652	5387	PMS2L3	uc003udp.2	NM_005395	guGUUGGGAU-CAC-CGCGGUAa	| || ||| || |||||||	uuCUACGCUACCUGUGCGCCAUa	2	20	101	123	[hg19:7:75140279-75140301:-]	0.5141	153	7	-22.06	-1.0383
MIMAT0003322	hsa-miR-652	390927	ZNF793	uc010efo.2	CR616392	guGUUGGGAUC-ACCGCGGUAa	::| || || | |||||||	agUGAGCCAAGAUCGCGCCAUu	2	20	119	140	[hg19:19:38033236-38033257:+]	0.5101	154	7	-18.13	-0.1234
MIMAT0003322	hsa-miR-652	339390	CLEC4G	uc002mhp.3	NM_198492	guguUGGGAUCAC--CGC-GGUAa	:||||:| | ||| ||||	caguGCCCUGGAGCCGCGCCCAUu	2	18	8	31	[hg19:19:7794221-7794244:-]	0.5826	120	0	-20.55	-0.2859
MIMAT0003322	hsa-miR-652	10110	SGK2	uc002xkt.2	BC006523	guguugggaucacCGCGGUAa	|||||||	gcugagguggccaGCGCCAUu	2	9	558	578	[hg19:20:42199317-42199337:+]	0.8165	140	7	-17.25	-0.2288
MIMAT0003322	hsa-miR-652	201799	TMEM154	uc003imw.1	NM_152680	guguUGGGAUCACCGCG-GUAa	|||: | |||||| |||	----ACCUGAAUGGCGCUCAUg	2	18	1	18	[hg19:4:153549680-153549697:-]	0.6273	129	0	-18.75	-0.8796
MIMAT0003322	hsa-miR-652	9533	POLR1C	uc003ovn.2	NM_203290	guguuggGAUCACCGCGGUAa	:|| |:|||||	cauuuugUUAAAUGUGCCAUa	2	15	130	150	[hg19:6:43489168-43489188:+]	0.6157	126	0	-12	-0.1024
