# Supplementary material for: Expression of miR-652-3p and Effect on Apoptosis and Drug Sensitivity in Pediatric Acute Lymphoblastic Leukemia
Source: Biomed Res Int. 2018 Jun 5;2018:5724686. doi: 10.1155/2018/5724686 (PMC6008837; doi:10.1155/2018/5724686)
Supplement: Supplementary Materials — Supplementary Table 1: the expression profiles of circulating miRNAs were analyzed and compared among healthy controls and pediatric patients with ALL at new diagnosis (ND), complete remission (CR), and relapse (RE), using the qRT-PCR-based TaqMan low-density miRNA arrays. Supplementary Table 2: summary of the target prediction for miR-652-3p. Supplementary Table 3: the possible biological targets of miR-652-3p predicted by Target Scan software. Supplementary Table 4: the possible biological targets of miR-652-3p predicted by microRNA.org database. Supplementary Table 5: the possible biological targets of miR-652-3p predicted by miRDB database. [file 5724686.f1.zip › Supplementary Table 5 Target prediction by miRDB.xlsx]

## Sheet: Supplementary Table 5
Target Rank	Target Score	miRNA Name	Gene Symbol	Gene Description
1	86	hsa-miR-652-3p	NPTN	neuroplastin
2	83	hsa-miR-652-3p	TNRC6A	trinucleotide repeat containing 6A
3	82	hsa-miR-652-3p	KCTD10	potassium channel tetramerization domain containing 10
4	66	hsa-miR-652-3p	TGFBRAP1	transforming growth factor, beta receptor associated protein 1
5	63	hsa-miR-652-3p	CAPZB	capping protein (actin filament) muscle Z-line, beta
6	60	hsa-miR-652-3p	FAM71F2	family with sequence similarity 71, member F2
7	56	hsa-miR-652-3p	EOMES	eomesodermin
8	52	hsa-miR-652-3p	ISL1	ISL LIM homeobox 1
9	52	hsa-miR-652-3p	VCPIP1	valosin containing protein (p97)/p47 complex interacting protein 1
10	50	hsa-miR-652-3p	LLGL1	lethal giant larvae homolog 1 (Drosophila)
